# Supplementary material for: Spatiotemporal analysis of glioma heterogeneity reveals COL1A1 as an actionable target to disrupt tumor progression
Source: PubMed Central journal article supplement (PMC9232499; doi:10.1038/s41467-022-31340-1), 2022-06-24
Supplement: 41467_2022_31340_MOESM1_ESM.pdf [file 41467_2022_31340_MOESM1_ESM.pdf]

# Supplementary Information

## **Spatiotemporal analysis of glioma heterogeneity reveals Col1A1 as an actionable target to disrupt tumor progression**

Andrea Comba, Syed M. Faisal, Patrick J. Dunn, Anna E. Argento, Todd C. Hollon, Wajd N. Al-Holou, Maria Luisa Varela, Daniel B. Zamler, Gunnar L Quass, Pierre F. Apostolides, Clifford Abel II, Christine E. Brown, Phillip E. Kish, Alon Kahana, Celina G. Kleer, Sebastien Motsch, Maria G Castro, Pedro R. Lowenstein, \*

\*Correspondence to: [pedrol@umich.edu](mailto:pedrol@umich.edu)

### **This file includes:**

Supplementary Methods

Supplementary Figures S1-S37

Supplementary Tables S1, S2, S3, S4, S6, S6, S7

### **Other Supplementary Data Files:**

Movies #1 to #17

Supplementary Data 1

Supplementary Data 2

## 29 SUPPLEMENTARY METHODS

30

### 31 Craniotomy and cranial window implantation

32 Mice were anesthetized using an intraperitoneal injection of injectable anesthetics  
33 ketamine and dexmedetomidine. One dose of carprofen was given pre-operatively, and  
34 another dose was given 24hr post-surgery. Eye ointment was applied prior to surgery,  
35 and hairs overlying the skull were clipped with a hair-clipper. Following anesthesia  
36 induction, the mouse was placed in a stereotactic apparatus and betadine disinfectant  
37 was applied to the incision site. The skin was cut, retracted and periosteum, as well as  
38 musculature on the surface of the skull, was gently scraped to ensure entire cranium dry  
39 and rough. Then, a craniotomy was made over the right hemisphere in between the  
40 bregma and lambda (size, 3x3 mm; center relative to Bregma: lateral right, 0.5mm;  
41 posterior, 0.5mm). Multiple rounds of slow and delicate drilling were performed to ensure  
42 that underlying brain matter did not overheat. The skull was moistened with chilled sterile  
43 saline solution in between rounds of drilling to further reduce heat and swelling. Once the  
44 edges of the craniotomy are thin enough, the skull fragment in a single piece was then  
45 removed using fine forceps or a 26G needle. Intracranial injection of  $5 \times 10^4$  GFP<sup>+</sup> NPA or  
46 NPAsCOL1A1 glioma cells were implanted at a depth of 0.8mm ventral through the  
47 craniotomy overlying the brain cortex of B6.129(Cg)-Gt(ROSA)26Sortm4(ACTB-  
48 tdTomato-EGFP)Luo/J using a Hamilton syringe in a volume of 1ul over the period of  
49 5min. These tdTomato mice were utilized to identify (in red) normal brain tissue, and thus  
50 establish tumor borders.

51 Following the injection, imaging window was constructed from two layers of standard  
52 microscope cover glass (Electron Microscopy Sciences), of which one was small (3mm)  
53 equal to the size of the craniotomy and another was large (5mm), which were joined with  
54 an ultraviolet curable optical adhesive (NOR-71, Norland). Two layered coverslip was  
55 carefully placed over the exposed brain filled with saline to facilitate visual access to tumor  
56 and brain during the imaging. A larger piece was attached to the cranium and a smaller  
57 insert was fitted snugly into the craniotomy. The cyanoacrylate-based adhesive (Krazy  
58 glue) was spread with a needle towards the edges of the larger coverslip to avoid leeching  
59 of the glue underneath of the coverslip obscuring the brain. To permanently secure the  
60 coverslip on the skull, the coverslip was held in place by gentle pressure from a blunt

61 needle of the syringe. A thin layer of glue was then applied over the entire surface of the  
62 exposed skull except for the location of the craniotomy. Once the adhesive was set, the  
63 blunt needle was slowly lifted away, and the coverslip was further reinforced to the skull  
64 with dental cement. A lightweight, metallic headbar was positioned on the skull posterior  
65 to the cranial window and affixed using dental cement to stabilize the imaging plane and  
66 minimize motion artifacts during the time-lapse imaging. A dental acrylic well was created  
67 around the cranial window to immerse the imaging objective. Upon hardening of the  
68 dental cement, the animal was removed from and allowed to recover on a heating pad in  
69 its home cage while under constant supervision. The animal was placed in a new home  
70 cage with only one animal per cage and allowed to recover. The animals were recovered  
71 from anesthesia using Atipamezole via intra-peritoneal injection (1.0 mg/Kg) to reverse  
72 Ketamine/Xylazine, and a single subcutaneous injection of Buprenorphine (0.1mg/kg  
73 subcutaneous) was administered as post-operative pain relief. Water-soaked chow in  
74 ceramic crock was placed on the cage floor post-op. The following day the animal was  
75 received a second dose of carprofen for pain relief.

76

#### 77 **Two photon intravital live imaging *in vivo*:**

78 One-week NPA tumor cells' injection and cranial window implantation, and two-weeks  
79 post NPAsCOL1A1 implantation, mice were monitored for tumor growth using an IVIS  
80 bioluminescence imaging system. Mice with positive bioluminescent signal were placed  
81 in the glass jar and anesthesia was induced using isoflurane (3%). After anesthesia was  
82 achieved, mouse was transported to the multiphoton imaging platform and held in place  
83 using the headbar and headbar clamp. The breadboard (Thorlabs) was fitted with a nose  
84 cone for applying inhalational isoflurane anesthesia while the mouse was placed in the  
85 headbar clamp. Water base immersion oil was used to fill the dental acrylic well and the  
86 objective of the microscope was lowered towards the cranial window until it was situated  
87 just beneath the surface layer of oil. The animal was placed on a heating pad to maintain  
88 physiologic body temperature regulated by a rectal thermal probe (Stoelting), under  
89 continuous light anesthesia with isoflurane (1%). Dehydration was prevented by giving  
90 300µl isotonic saline every three hours using a catheter placed subcutaneously. Eyes  
91 were lubricated with eye-ointment to prevent drying while under anesthesia. The vitals of

92 the mice were monitored using a mouse thigh sensor with MouseOX Plus (Star Life  
93 Sciences Corp). To visualize glioma dynamics in real-time in the living animal with a  
94 Bruker Optima two-photon microscope, using a Chameleon Ti-sapphire laser (Coherent)  
95 tuned to 920 nm and attenuated with a Pockels cell to adjust the power at the sample so  
96 that approximately the same signal level could be achieved at a constant frame rate  
97 starting from 150mW for the surface to 300mW at imaging depths of 300-330  $\mu\text{m}$ . The  
98 images were acquired with a 20X water immersion objective (Olympus, NA 1.0). To avoid  
99 imaging at the brain surface, first we acquired high-resolution 3D z-stacks spanning 0-  
100 330  $\mu\text{m}$  depth from the surface of the brain. Z-stacks were then imported to Imaris viewer  
101 version 9.8 (Bitplane, Imaris, Oxford Instruments, MA, USA) to obtain 3D images. We  
102 then used Orthoslicer3D to reveal the depth of the imaging position in relation to the  
103 surface of the brain for time-lapse data acquisition. Images within the cortex were taken  
104 of the GFP+ tumor (peak excitation: 700nm) and TdTomato brain (peak excitation:  
105 920nm) every 5min for up to 8-12 hours. Emitted fluorescence was split with a dichroic  
106 mirror to separate green (GFP) and red (Tdtomato) channels. Once imaging was  
107 complete, animals were removed from the stereotactic frame and allowed to recover in a  
108 clean cage under a heating lamp.

109

### 110 **Mathematical analysis of tumor cell movement**

111 We used as parameters for the cell size (called 'blob') 20 $\mu\text{m}$  and a threshold of 1 together  
112 with the DoG method (Difference of Gaussian detectors). We then obtained for each  
113 experiment several paths for many different cells. To reduce the erratic behavior, we  
114 filtered the trajectories. From the data obtained with TrackMate, we then smoothed out  
115 the paths which allowed to estimate the velocity of each cell. We simply use a Gaussian  
116 Kernel as a filter (with standard deviation  $\sigma = 2$  and a stencil of 9 points). Thus, we had  
117 an estimation of the positions  $x_i(t)$  and velocities  $v_i(t)$  of the cells  $i$ . From the velocity  $v_i(t)$ ,  
118 we also deduced the velocity direction  $\theta_i(t)$ .

119 After obtaining these parameters we applied several statistics to investigate cell behavior.  
120 Each cell is characterized by a position  $x_i \in \mathbb{R}^2$  and a velocity  $v_i \in \mathbb{R}^2$ . The velocity vector  
121  $v$  can be decomposed into a speed (scalar)  $c = |v|$  and angle direction  $\theta$  such that  $v = c$   
122  $(\cos \theta, \sin \theta)$ . We utilized three statistics to visualize the distribution of velocity: (i)



123 distribution of velocity angle  $\theta$  (provides indication of the overall direction of the cells); (ii)  
 124 distribution of speed  $c$  and (iii) distribution of the velocity vector  $v = (v_x, v_y)$ . Since  $v$  is a  
 125 vector, we need to plot a 'heatmap' to visualize its distribution.

126 To understand the organization of oncostream dynamics we analyzed the cell-cell  
 127 correlation using two further statistics using pair wise information: (i) Neighbor density:  
 128 taking a reference cell  $x_i$ , we estimate the probability to have another cell  $x_j$  nearby, and,  
 129 (ii) velocity correlation: depending on the position of a nearby  $x_j$ , estimate the correlation:  
 130  $\omega_i \cdot \omega_j$  where  $\omega_i$  (resp.  $\omega_j$ ) is the (normalized) velocity direction of cell  $i$  (resp.  $j$ ). A  
 131 correlation of  $+1/-1$  indicates that cells are moving in the same/opposite direction,  
 132 whereas 0 indicates that they move in orthogonal direction. Orthogonal direction is when  
 133  $\omega_i \cdot \omega_j = 0$ . Details on how to estimate numerically the correlation functions are described  
 134 in **Fig. S17 A, B, C**.

135

### 136 **Classification of glioma migration patterns**

137 Our data-set consists of cell orientations  $\theta_n \in [0, 2\pi)$  with  $n = 1..N$  indexing the cells and  
 138  $N$  being the total number of cells in a given zone. Zones were defined by either varying  
 139 density, alignment, geographical distribution, and/or movement patterns of cells for each  
 140 experiment. We build a criteria to decide whether the underlying distribution of  
 141 orientations  $\theta$  is *more like* a flock, a stream or a swarm. With this aim, we define three  
 142 types of distributions  $\rho_{flock}$ ,  $\rho_{stream}$  and  $\rho_{swarm}$  and use *likelihood* estimation to determine  
 143 which distribution is more likely (given the data-set  $\{\theta_n\}_{n=1..N}$ ). First, we present the three  
 144 distributions used to describe a flock, a stream and a swarm.

145 **Flock: wrapped normal distribution.** In a flock, the distribution of orientations should  
 146 be *uni-modal*, i.e. the orientations are centered around a given direction denoted  $\bar{\theta}$ . Thus,  
 147 we use for  $\rho_{flock}$  a *wrapped* Gaussian distribution:

$$148 \quad \rho_{flock}(\theta; \bar{\theta}, \sigma) = \frac{1}{\sigma\sqrt{2\pi}} \sum_{k=-\infty}^{\infty} e^{-\frac{|\theta - \bar{\theta} + 2\pi k|^2}{2\sigma^2}}, \quad (1)$$

149 where  $\bar{\theta}$  represents the 'peak' of the distribution and  $\sigma$  measures its spreading. Summing  
 150 in  $k$  is necessary to ensure that the distribution  $\rho_{flock}$  is  $2\pi$  periodic in  $\theta$ . The two free

151 parameters  $\bar{\theta}$  and  $\sigma$  of the distribution are determined by maximizing the *likelihood*, i.e. by  
 152 determining  $\bar{\theta}_*$  and  $\sigma_*$  the maximizers of the following quantity:

$$153 \quad \bar{\theta}_*, \sigma_* = \operatorname{argmax}_{\bar{\theta}, \sigma} \mathcal{L}(\bar{\theta}, \sigma) \quad \text{with} \quad \mathcal{L}(\bar{\theta}, \sigma) = \prod_{n=1}^N \rho_{flock}(\theta_n; \bar{\theta}, \sigma). \quad (2)$$

154 After some standard computations (taking the log), we find an explicit solution:

$$155 \quad \bar{\theta}_* = \operatorname{Arg}(\bar{\mathbf{z}}) \quad , \quad \sigma_*^2 = -\ln R_e^2$$

$$156 \quad \text{with} \quad \bar{\mathbf{z}} = \frac{1}{N} \sum_{n=1}^N i\theta_n \quad (\text{using complex number}) \quad \text{and} \quad R_e^2 = \frac{N}{N-1} \left( |\bar{\mathbf{z}}|^2 - \frac{1}{N} \right).$$

157 **Stream: symmetric wrapped normal distribution.** In a stream, the distribution of  
 158 orientations is only  $\pi$  periodic since the distribution of cells moving in both directions inside  
 159 the stream should be alike. Thus, we use for  $\rho_{stream}$  a symmetric version of  $\rho_{flock}$ :

$$160 \quad \rho_{stream}(\theta; \bar{\theta}, \sigma) = \frac{1}{2} \left( \rho_{flock}(\theta; \bar{\theta}, \sigma) + \rho_{flock}(\theta + \pi; \bar{\theta}, \sigma) \right) \quad (3)$$

161 where  $\rho_{flock}(\theta; \bar{\theta}, \sigma)$  is defined in (Eq. 1). The estimation of the two free parameters  $\bar{\theta}$   
 162 and  $\sigma$  can be estimated as previously by maximizing the likelihood. We notice for that the  
 163 following identity:

$$164 \quad \begin{aligned} \rho_{stream}(\theta; \bar{\theta}, \sigma) &= \frac{1}{2\sigma\sqrt{2\pi}} \sum_{k=-\infty}^{\infty} \left( -\frac{|\theta - \bar{\theta} + 2\pi k|^2}{2\sigma^2} + -\frac{|\theta - \bar{\theta} + 2\pi k + 2\pi|^2}{2\sigma^2} \right) \\ &= \frac{1}{2\sigma\sqrt{2\pi}} \sum_{k=-\infty}^{\infty} \left( -\frac{|2\theta - 2\bar{\theta} + 4\pi k|^2}{2(2\sigma)^2} + -\frac{|2\theta - 2\bar{\theta} + 4\pi k + 2\pi|^2}{2(2\sigma)^2} \right) \\ &= \frac{1}{2\sigma\sqrt{2\pi}} \sum_{k=-\infty}^{\infty} -\frac{|2\theta - 2\bar{\theta} + 2\pi k|^2}{2(2\sigma)^2} = \rho_{flock}(2\theta; 2\bar{\theta}, 2\sigma). \end{aligned} \quad (4)$$

165 Thus, the parameters  $\bar{\theta}_*$  and  $\sigma_*$  for the stream distribution are estimated using with

$$166 \quad \bar{\mathbf{z}}_2 = \frac{1}{N} \sum_{n=1}^N i2\theta_n \quad \text{in lieu of } \bar{\mathbf{z}}.$$

167 **Swarm: uniform distribution.** In a swarm, the orientations of the cells are 'random'  
 168 meaning that all directions are equally probable. Thus, the distribution  $\rho_{swarm}$  is simply  
 169 constant:

$$170 \rho_{swarm}(\theta) = \frac{1}{2\pi}.$$

171 There is no free parameters. The normalization  $2\pi$  is to make sure that the distribution

$$172 \text{ satisfies } \int_0^{2\pi} \rho_{swarm}(\theta) d\theta = 1.$$

173 **Model selection.** Since we have now three distributions  $\rho_{flock}$ ,  $\rho_{stream}$  and  $\rho_{swarm}$ , we  
 174 can determine the likelihood of our data-set  $\{\theta_n\}_{n=1..N}$  in each case. The higher the  
 175 likelihood, the higher the chance the model (flock, stream or flock) is selected. However,  
 176 this strategy will never select a swarm since there is no free parameter in  $\rho_{swarm}$  and a  
 177 flock or stream distribution can be made uniform with  $\sigma$  large. One could penalize having  
 178 free parameters in  $\rho_{flock}$  and  $\rho_{stream}$  using information criterion (e.g. AIC, BIC) but even  
 179 then swarm distributions are not selected, a flock or a stream will always be selected.

180 For this reason, we *fix* a priori the value of  $\sigma$  for the flock and stream distribution  $\rho_{flock}$   
 181 and  $\rho_{stream}$ . In other words, a distribution will be considered a flock if the distribution is  
 182 not "too" flat. We choose:

$$183 \sigma_{flock}^2 = 2 \quad , \quad \sigma_{stream}^2 = 1. \tag{5}$$

184 We give an illustration with the experiment "scene 5" zone D in figure 3. The associated  
 185 log-likelihood gives:

$$186 \ln(\mathcal{L}_{flock}) = -46798.93, \quad \ln(\mathcal{L}_{stream}) = -43583.16, \quad \ln(\mathcal{L}_{swarm}) = -43732.28. \tag{6}$$

187 Thus, in this example, we select a stream formation since the log-likelihood is the highest.

188  
 189  
 190

191 **Analysis of the tumor borders**

192 **Phase separation.** We denote  $h(x, y)$  the original image of green intensity where  $(x, y)$   
193 is a position (pixel position) and  $h(x, y) \in [0,1]$  the intensity of green color (i.e. 1 indicate  
194 a tumor, 0 no tumor). We want to separate the image into two regions: inside the tumor  
195 (“+1”) and outside (“-1”).

196 To do so, we define a threshold  $h_* = .12$  and then apply the Allen-Cahn equation to the  
197 function  $c_0(x, y) = h(x, y) - h_*$ :

198 
$$\partial_t c = c(1 - c^2) + \gamma \Delta c \tag{7}$$

199 where  $\gamma = .5$  is the diffusion parameter to *smooth* the distribution. The source term “ $c(1 -$   
200  $c^2)$ ” makes the function  $c(x, y, t)$  converge to either  $-1$  or  $+1$ . The dynamics (7) can be  
201 interpreted as a gradient flow with respect to the energy:

202 
$$\mathcal{E}[c] = \int_{\mathbb{R}^2} \frac{1}{4} (c^2 - 1)^2 + \frac{\gamma}{2} |\nabla c|^2 \, d\mathbf{x}. \tag{8}$$

203 We present in Supplementary Figure S28 the evolution of the  $c(x, y, t)$  over time,  
204 transitioning from a representative original image (in red/blue scale instead of green) into  
205 a *binary* image with only two values  $-1$  and  $+1$ .

206 **Statistic of the border.** Once the image has been split into two regions (using Allen-  
207 Cahn equation), we investigate the sinuosity of the border. The sinuosity is defined as the  
208 ratio between the length of the curve  $L$  and the distance joining the end points of the curve  
209 (see Figure 8H-I). The more ‘sinuous’ a curve is, the large the sinuosity. We create a  
210 boxplot computing the sinuosity for all the experiments regrouping the experiments  
211 with/without collagen.

212

## Supplementary Tables

**Supplementary Table 1. Analysis of oncostreams on TCGA glioma diagnostic slides from the Genomic Data Commons Portal**

| TCGA Manual analysis |            |              |             |             |
|----------------------|------------|--------------|-------------|-------------|
| Grade                | Recurrence | Total Tumors | OS Positive | OS Negative |
| <b>GBM-Grade IV</b>  | Primary    | 100          | <b>47</b>   | 53          |
| <b>LGG-Grade III</b> | Primary    | 70           | <b>6</b>    | 64          |
| <b>LGG-Grade II</b>  | Primary    | 50           | <b>0</b>    | 50          |

**Supplementary Table 2. Summary results of oncostreams detection using manually histopathological analysis and deep learning segmentation**

| Accuracy of methodologies for Oncostreams analysis |                      |             |          |             |                |
|----------------------------------------------------|----------------------|-------------|----------|-------------|----------------|
| Tumor                                              | Method               | Oncostreams |          | Concordance |                |
|                                                    |                      | Positive    | Negative | Images #    | Percentage (%) |
| GBM - Grade IV                                     | <b>Manually</b>      | 77          | 32       | 88/109      | 80.7           |
|                                                    | <b>Deep Learning</b> | 78          | 31       |             |                |
| LGG - Grade III                                    | <b>Manually</b>      | 29          | 97       | 113/126     | 89.7           |
|                                                    | <b>Deep Learning</b> | 24          | 102      |             |                |
| LGG - Grade II                                     | <b>Manually</b>      | 0           | 61       | 60/61       | 98.4           |
|                                                    | <b>Deep Learning</b> | 1           | 60       |             |                |

**Supplementary Table 3. Enriched Gene Ontologies (GOs) biological process within oncostream fascicles**

| <b>GO ID</b> | <b>Go Name</b>                                          | <b>countDE</b> | <b>countAll</b> | <b>pv_fdr</b> |
|--------------|---------------------------------------------------------|----------------|-----------------|---------------|
| GO:0030335   | positive regulation of cell migration                   | 9              | 561             | 0.000845      |
| GO:2000147   | positive regulation of cell motility                    | 9              | 584             | 0.000845      |
| GO:0040017   | positive regulation of locomotion                       | 9              | 600             | 0.000845      |
| GO:0051272   | positive regulation of cellular component movement      | 9              | 604             | 0.000845      |
| GO:0030334   | regulation of cell migration                            | 10             | 932             | 0.002304      |
| GO:2000145   | regulation of cell motility                             | 10             | 982             | 0.002731      |
| GO:0040012   | regulation of locomotion                                | 10             | 1029            | 0.003686      |
| GO:0051270   | regulation of cellular component movement               | 10             | 1072            | 0.004748      |
| GO:0006950   | response to stress                                      | 18             | 3567            | 0.006971      |
| GO:0032963   | collagen metabolic process                              | 4              | 111             | 0.007461      |
| GO:0016477   | cell migration                                          | 11             | 1488            | 0.011264      |
| GO:0040011   | locomotion                                              | 12             | 1842            | 0.01536       |
| GO:0048870   | cell motility                                           | 11             | 1647            | 0.022187      |
| GO:0051674   | localization of cell                                    | 11             | 1647            | 0.022187      |
| GO:0051240   | positive regulation of multicellular organismal process | 12             | 1973            | 0.022674      |
| GO:0030198   | extracellular matrix organization                       | 5              | 301             | 0.022674      |
| GO:0043062   | extracellular structure organization                    | 5              | 302             | 0.022674      |
| GO:0009605   | response to external stimulus                           | 14             | 2673            | 0.027927      |
| GO:0006952   | defense response                                        | 10             | 1521            | 0.040737      |

**Supplementary Table 4. Pathways of the Network for COL1A1**

| <b>Pathways of the Network including Col1a1</b>         | <b>p-value</b> | <b>FDR</b> | <b>Genes</b>                                    | <b>minusLOGFDR</b> |
|---------------------------------------------------------|----------------|------------|-------------------------------------------------|--------------------|
| Relaxin signaling pathway(K)                            | 2.96E-07       | 2.52E-05   | Mapk3,Jun,Fos,Mmp9,Nfkb1,Col1a1,Acta2           | 4.598823558        |
| AGE-RAGE signaling pathway in diabetic complications(K) | 2.31E-05       | 3.99E-04   | Mapk3,Jun,Stat3,Nfkb1,Col1a1                    | 3.398907391        |
| Focal adhesion(K)                                       | 5.91E-04       | 3.55E-03   | Fyn,Mapk3,Jun,Col1a1,Ctnnb1                     | 2.450138812        |
| Human papillomavirus infection(K)                       | 1.01E-03       | 5.07E-03   | Hdac2,Mapk3,Isg15,Nfkb1,Col1a1,Ctnnb1           | 2.29537768         |
| Extracellular matrix organization(R)                    | 2.00E-03       | 7.99E-03   | Adamts2,Mmp9,Mmp10,Col1a1,Tll1                  | 2.097529324        |
| RNA Polymerase II Transcription(R)                      | 2.69E-03       | 9.98E-03   | Hdac2,Irak1,Ubc,Mapk3,Jun,Fos,Col1a1,Sp1,Ctnnb1 | 2.00075198         |
| VEGFR3 signaling in lymphatic endothelium(N)            | 3.43E-03       | 0.0103     | Mapk3,Col1a1                                    | 1.987162775        |
| Platelet activation(K)                                  | 8.79E-03       | 0.0213     | Fyn,Mapk3,Col1a1                                | 1.671620397        |
| Beta3 integrin cell surface interactions(N)             | 9.77E-03       | 0.0213     | Cyr61,Col1a1                                    | 1.671620397        |
| Integrin signalling pathway(P)                          | 0.0172         | 0.0343     | Fyn,Mapk3,Col1a1                                | 1.46470588         |
| IL4-mediated signaling events(N)                        | 0.0207         | 0.0414     | Col1a1,Sp1                                      | 1.382999659        |
| Amoebiasis(K)                                           | 0.0434         | 0.0472     | Nfkb1,Col1a1                                    | 1.326058001        |



**Supplementary Table 5. Pathways of the Modules**

| Module | GeneSet                                                                  | FDR    | Nodes      | NegLOGFDR   |
|--------|--------------------------------------------------------------------------|--------|------------|-------------|
| M1     | Alzheimer disease-presenilin pathway(P)                                  | 0.0461 | Acta2,Mmp9 | 1.336299075 |
|        | Leukocyte transendothelial migration(K)                                  | 0.0461 | Cdh5,Mmp9  | 1.336299075 |
|        | Relaxin signaling pathway(K)                                             | 0.0461 | Acta2,Mmp9 | 1.336299075 |
|        | Fluid shear stress and atherosclerosis(K)                                | 0.0461 | Cdh5,Mmp9  | 1.336299075 |
|        | Effects of Botulinum toxin(N)                                            | 0.0461 | Syt1       | 1.336299075 |
|        | Synaptic vesicle trafficking(P)                                          | 0.0461 | Syt1       | 1.336299075 |
|        | Extracellular matrix organization(R)                                     | 0.0461 | Mmp9,Mmp10 | 1.336299075 |
|        | Syndecan-1-mediated signaling events(N)                                  | 0.0461 | Mmp9       | 1.336299075 |
|        | Wnt signaling pathway(P)                                                 | 0.0461 | Acta2,Cdh5 | 1.336299075 |
|        | Nicotinic acetylcholine receptor signaling pathway(P)                    | 0.0461 | Acta2      | 1.336299075 |
|        | S1P2 pathway(N)                                                          | 0.0461 | Cdh5       | 1.336299075 |
|        | Osteopontin-mediated events(N)                                           | 0.0461 | Mmp9       | 1.336299075 |
|        | amb2 Integrin signaling(N)                                               | 0.0461 | Mmp9       | 1.336299075 |
|        | Syndecan-4-mediated signaling events(N)                                  | 0.0461 | Mmp9       | 1.336299075 |
|        | Validated transcriptional targets of AP1 family members Fra1 and Fra2(N) | 0.0461 | Mmp9       | 1.336299075 |

| Module | GeneSet                                                                       | FDR    | Nodes | NegLOGFDR   |
|--------|-------------------------------------------------------------------------------|--------|-------|-------------|
| M2     | Beta5 beta6 beta7 and beta8 integrin cell surface interactions(N)             | 0.0405 | Cyr61 | 1.392544977 |
|        | Beta2 integrin cell surface interactions(N)                                   | 0.0405 | Cyr61 | 1.392544977 |
|        | Primary immunodeficiency(K)                                                   | 0.0405 | Ciita | 1.392544977 |
|        | Beta3 integrin cell surface interactions(N)                                   | 0.0405 | Cyr61 | 1.392544977 |
|        | RhoA signaling pathway(N)                                                     | 0.0405 | Cyr61 | 1.392544977 |
|        | Antimicrobial peptides(R)                                                     | 0.0405 | Lcn2  | 1.392544977 |
|        | Iron uptake and transport(R)                                                  | 0.0405 | Lcn2  | 1.392544977 |
|        | AP-1 transcription factor network(N)                                          | 0.0405 | Cyr61 | 1.392544977 |
|        | Interferon gamma signaling(R)                                                 | 0.0405 | Ciita | 1.392544977 |
|        | Antigen processing and presentation(K)                                        | 0.0405 | Ciita | 1.392544977 |
|        | Regulation of nuclear beta catenin signaling and target gene transcription(N) | 0.0405 | Cyr61 | 1.392544977 |
|        | IL-17 signaling pathway(K)                                                    | 0.0405 | Lcn2  | 1.392544977 |
|        | Post-translational protein phosphorylation(R)                                 | 0.0464 | Cyr61 | 1.333482019 |
|        | Interleukin-4 and Interleukin-13 signaling(R)                                 | 0.0481 | Lcn2  | 1.317854924 |
|        | Toxoplasmosis(K)                                                              | 0.049  | Ciita | 1.30980392  |

| Module | GeneSet                                | FDR    | Nodes | NegLOGFDR   |
|--------|----------------------------------------|--------|-------|-------------|
| M3     | Ether lipid metabolism(K)              | 0.0581 | Enpp2 | 1.235823868 |
|        | Interferon gamma signaling(R)          | 0.0581 | Gbp1  | 1.235823868 |
|        | Glycerophospholipid biosynthesis(R)    | 0.0581 | Pla1a | 1.235823868 |
|        | NOD-like receptor signaling pathway(K) | 0.0581 | Gbp1  | 1.235823868 |
|        | Ras signaling pathway(K)               | 0.0796 | Pla1a | 1.099086932 |

| Module | GeneSet                                                                   | FDR      | Nodes | NegLOGFDR   |
|--------|---------------------------------------------------------------------------|----------|-------|-------------|
| M4     | Reelin signalling pathway(R)                                              | 7.08E-03 | Vldlr | 2.150236727 |
|        | Reelin signaling pathway(N)                                               | 7.42E-03 | Vldlr | 2.12976001  |
|        | Lissencephaly gene (LIS1) in neuronal migration and development(N)        | 7.42E-03 | Vldlr | 2.12976001  |
|        | EPHA forward signaling(N)                                                 | 7.42E-03 | Epha4 | 2.12976001  |
|        | Urokinase-type plasminogen activator (uPA) and uPAR-mediated signaling(N) | 7.42E-03 | Vldlr | 2.12976001  |
|        | Plasma lipoprotein assembly, remodeling, and clearance(R)                 | 0.012    | Vldlr | 1.920818754 |
|        | EPH-Ephrin signaling(R)                                                   | 0.0152   | Epha4 | 1.818156412 |
|        | Axon guidance(K)                                                          | 0.0307   | Epha4 | 1.512861625 |

| Module | GeneSet                                                 | FDR      | Nodes               | NegLOGFDR   |
|--------|---------------------------------------------------------|----------|---------------------|-------------|
| M5     | Extracellular matrix organization(R)                    | 2.12E-04 | Col1a1,Adamts2,Tll1 | 3.67434069  |
|        | VEGFR3 signaling in lymphatic endothelium(N)            | 0.026    | Col1a1              | 1.585026652 |
|        | Beta3 integrin cell surface interactions(N)             | 0.026    | Col1a1              | 1.585026652 |
|        | IL4-mediated signaling events(N)                        | 0.026    | Col1a1              | 1.585026652 |
|        | Beta1 integrin cell surface interactions(N)             | 0.026    | Col1a1              | 1.585026652 |
|        | ECM-receptor interaction(K)                             | 0.026    | Col1a1              | 1.585026652 |
|        | Protein digestion and absorption(K)                     | 0.026    | Col1a1              | 1.585026652 |
|        | Amoebiasis(K)                                           | 0.026    | Col1a1              | 1.585026652 |
|        | AGE-RAGE signaling pathway in diabetic complications(K) | 0.026    | Col1a1              | 1.585026652 |
|        | Platelet activation(K)                                  | 0.0323   | Col1a1              | 1.490797478 |
|        | Binding and Uptake of Ligands by Scavenger Receptors(R) | 0.0325   | Col1a1              | 1.488116639 |
|        | Relaxin signaling pathway(K)                            | 0.0341   | Col1a1              | 1.467245621 |
|        | Integrin signalling pathway(P)                          | 0.0413   | Col1a1              | 1.384049948 |

| Module | GeneSet                     | FDR    | Nodes   | NegLOGFDR   |
|--------|-----------------------------|--------|---------|-------------|
| M6     | Neutrophil degranulation(R) | 0.0374 | S100a11 | 1.427128398 |

**Supplementary Table 6–List of antibodies used for immuno-histochemistry analysis**

| <b>Primary antibody name</b>                            | <b>Company</b>              | <b>Catalog #</b> | <b>Host</b> | <b>Dilution</b> |
|---------------------------------------------------------|-----------------------------|------------------|-------------|-----------------|
| Anti-Nuclei Antibody, Clone 235-1 (HuNu)                | Millipore<br>Sigma          | MAB1281          | Mouse       | 1:100           |
| Anti-Green Fluorescent Protein (GFP)                    | Rockland                    | 600-101-215      | Goat        | 1:1000          |
| Anti-Alpha Smooth Muscle Actin ( $\alpha$ -SMA/ACTA2)   | Abcam                       | ab5694           | Rabbit      | 1:500           |
| Anti-Glial Fibrillary Acidic Protein (GFAP)             | Millipore<br>Sigma          | AB5804           | Rabbit      | 1:1000          |
| Anti-Neurofilament-L (C28e10)                           | Cell Signaling              | 2837             | Rabbit      | 1:100           |
| Anti-E-Cadherin (24E10)                                 | Cell Signaling              | 3195             | Rabbit      | 1:400           |
| Anti-N-Cadherin                                         | Abcam                       | AB18203          | Rabbit      | 1:1000          |
| Anti-Nestin                                             | Novus                       | NB100-1604       | Chicken     | 1:800           |
| Anti Sox2                                               | Invitrogen                  | MA1-014          | Mouse       | 1:200           |
| Anti-Iba1 Antibody [EPR16588]                           | Abcam                       | ab178846         | Rabbit      | 1:500           |
| Anti-BrdU (Bu20a)                                       | Cell Signaling              | 5292             | Mouse       | 1:200           |
| Anti-Collagen I                                         | Abcam                       | ab34710          | Rabbit      | 1:500           |
| Anti-Collagen 1A1                                       | Thermo Fisher<br>Scientific | PA5-29569        | Rabbit      | 1:500           |
| Anti-Fibronectin                                        | Abcam                       | ab2413           | Rabbit      | 1:1000          |
| Anti-CD68                                               | Abcam                       | ab125212         | Rabbit      | 1:1000          |
| Anti-CD31                                               | Cell Signaling              | 77699            | Rabbit      | 1:100           |
| Anti-Survivin                                           | Cell Signaling              | 2808             | Rabbit      | 1:500           |
| Anti-PCNA                                               | Cell Signaling              | 2586             | Mouse       | 1:1000          |
| Anti-Cleaved Caspase 3                                  | Cell Signaling              | 9661             | Rabbit      | 1:400           |
| Anti-TdTomato                                           | SICGEN                      | AB8181-200       | Goat        | 1:200           |
| Anti-Glial Fibrillary Acidic Protein (GFAP)             | EMD Millipore               | AB5541           | Chicken     | 1:500           |
| Anti-Green Fluorescent Protein (GFP)                    | Abcam                       | AB290            | Rabbit      | 1:500           |
| <b>Secondary antibody name</b>                          | <b>Company</b>              | <b>Catalog #</b> | <b>Host</b> | <b>Dilution</b> |
| Polyclonal Goat Anti-Rabbit Immunoglobulins/Biotin      | Agilent                     | E043201-6        | Goat        | 1:1000          |
| Polyclonal Goat Anti-Mouse Immunoglobulins/Biotinylated | Agilent                     | E0433            | Goat        | 1:1000          |
| Goat Anti-Chicken IgY Antibody (H+L), Biotinylated      | Vector<br>Laboratories      | BA-9010-1.5      | Goat        | 1:1000          |
| Alexa Fluor 555 Goat anti-Chicken IgY (H+L)             | Invitrogen                  | A21437           | Donkey      | 1:1000          |

|                                                     |                              |             |        |        |
|-----------------------------------------------------|------------------------------|-------------|--------|--------|
| Alexa Fluor Plus 488 Donkey anti-Rabbit IgG (H+L)   | Invitrogen                   | A32790      | Donkey | 1:1000 |
| Alexa Fluor Plus 488 Donkey anti-Goat IgG (H+L)     | Invitrogen                   | A32814      | Donkey | 1:1000 |
| Alexa Fluor Plus 555 Donkey anti-Rabbit IgG (H+L)   | Invitrogen                   | A32794      | Donkey | 1:1000 |
| Alexa Fluor Plus 647 Donkey anti-Goat IgG (H+L)     | Invitrogen                   | A21447      | Donkey | 1:1000 |
| Alexa Fluor 594 Donkey anti-Chicken IgY (IgG) (H+L) | Jackson Immuno-Research Labs | 703-585-155 | Donkey | 1:1000 |
| Alexa Fluor 488 Donkey Anti-Mouse IgG (H+L)         | Invitrogen                   | A21202      | Donkey | 1:1000 |

**Supplementary Table 7- IOU values over the testing set.**

| Dataset  | Number of Slides | IOU (% , mean) | IOU (% , sd) | Range (%)   |
|----------|------------------|----------------|--------------|-------------|
| Mouse    | 30               | 76.6           | 14.2         | 41.1 - 94.4 |
| TCGA II  | 11               | 100*           | 0            | 100         |
| TCGA III | 11               | 73.6           | 11.7         | 54.9 - 87.9 |
| TCGA IV  | 12               | 75.5           | 12.7         | 52.6 - 97.3 |
| All      | 64               | 80.3           | 11.2         | 52.9 - 100  |

\* No oncostreams were present in TCGA II data and our model did not have any false positive errors for this dataset

## **Other Supplementary information**

### **Supplementary Data 1. Oncostreams analysis using TCGA-GBM and TCGA-LGG histological tissues database**

### **Supplementary Data 2. Oncostreams' differentially gene expression analysis**

#### **Movies 1 to 4. Glioma dynamics at the tumor core.**

Time-lapse confocal imaging of explant brain slice cultures of NPA glioma cores. Movement of tumor cells GFP positive (green) were analyzed within the tumor core. Imaging was obtained every 10 minutes for the duration of 293 cycles.

#### **Movies 5 to 9. Glioma dynamics at the tumor border.**

Glioma dynamic at the tumor border were analyzed using explant slice cultures glioma model by intracranial implantation of GFP positive NPA cells into the striatum of B6.129(Cg)-Gt(ROSA)26Sortm4(ACTB-tdTomato-EGFP)Luo/J- transgenic mice. Normal brain parenchyma is visualized in red. Imaging was obtained every 10 minutes for the duration of 186 cycles.

#### **Movies 10 to 13. Glioma dynamics of NPAsCOL1A1 tumors**

Cell glioma dynamic of NPA-ShCOL1A1 tumors were analyzed using explant slice cultures glioma model by intracranial implantation of GFP positive NPAsCOL1A1 cells into the striatum of B6.129(Cg)-Gt(ROSA)26Sortm4(ACTB-tdTomato-EGFP)Luo/J- transgenic mice. Normal brain parenchyma is visualized in red. Imaging was obtained every 10 minutes for the duration of 220 cycles.

#### **Movies 14-16. *In vivo* NPA glioma dynamics patterns employing 2-Photon intravital imaging**

GFP positive NPA glioma cells were intracranially implanted into the cortex of the brain of B6.129(Cg)-Gt(ROSA)26Sortm4(ACTB-tdTomato-EGFP)Luo/J- transgenic mice. Glioma dynamics patterns were evaluated by time-lapse intravital imaging using a two-photon microscope. Normal brain parenchyma is visualized in red and the glioma cells in green. Images were obtained every 5 minutes.

#### **Movie 17. *In vivo* NPAsCOL1A1 glioma dynamics patterns employing 2-Photon intravital imaging**

GFP positive NPAsCOL1A1 glioma cells were intracranially implanted into the cortex of the brain of B6.129(Cg)-Gt(ROSA)26Sortm4(ACTB-tdTomato-EGFP)Luo/J- transgenic mice. Glioma dynamics patterns were evaluated by time-lapse intravital imaging using a two-photon microscope. Normal brain parenchyma is visualized in red and the glioma cells in green. Images were obtained every 5 minutes.



**Fig. S1**

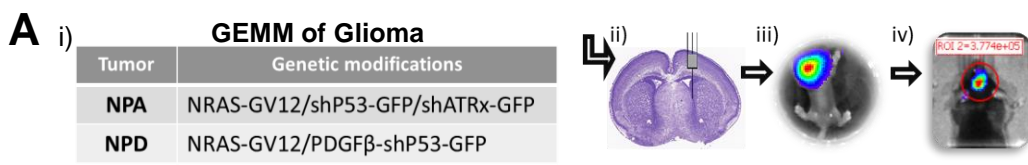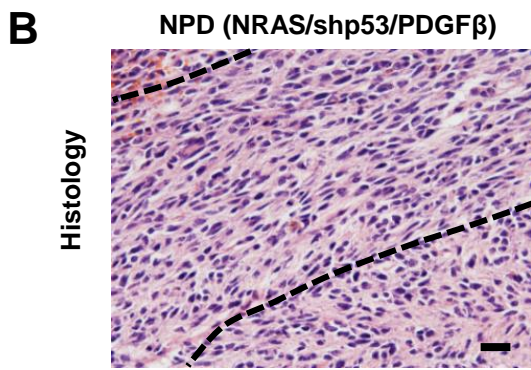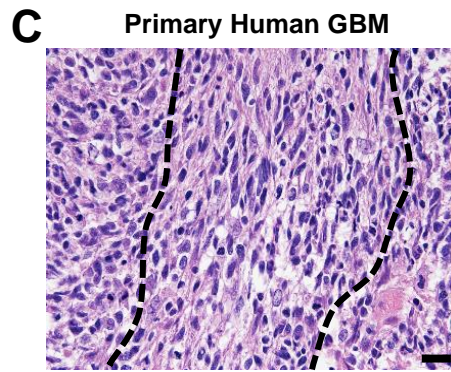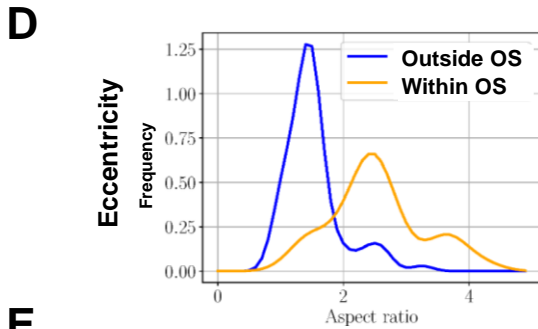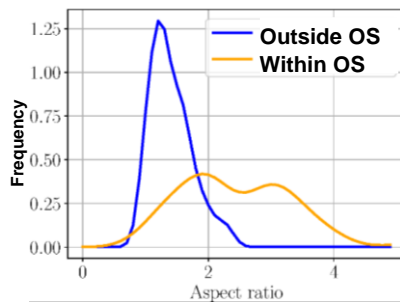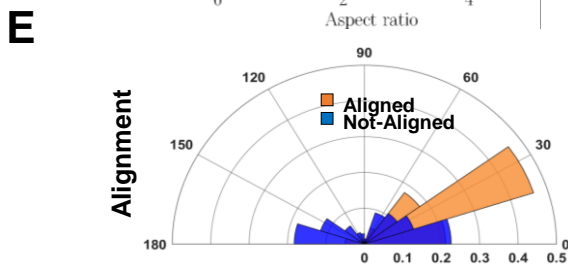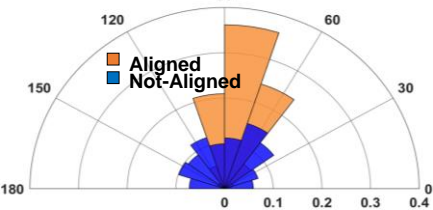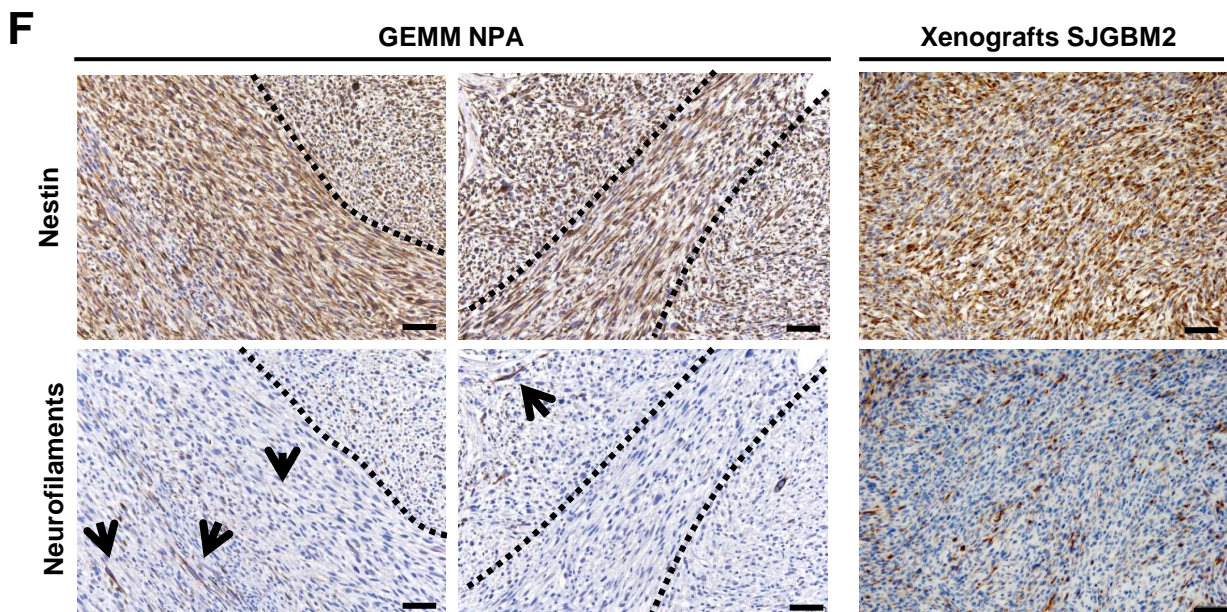

**Fig. S1: Oncostream characterization in mouse and human glioma tissue. A)** Schematic representation of the genetically engineered mouse models (GEMM) of glioma generated using the Sleeping Beauty transposase system; i) genetic makeup of NPA and NPD gliomas, ii) plasmid injection into the lateral ventricle of neonatal mice, iii) bioluminescence imaging of a neonatal mouse 1 day post-injection, iv) bioluminescence detection at 70 days post-injection. **B-C)** Representative Hematoxylin and Eosin 5  $\mu\text{m}$  of 5 independent tumor sections from gliomas showing that elongated glioma cells forming oncostreams (dotted line) are present in NPD (NRAS/shp53/PDGF $\beta$ ) GEMM, and in human glioma tissue. Scale bars: 50  $\mu\text{m}$ . **D)** Cellular eccentricity and alignment analysis on glioma GEMM (NPD) and human glioma representative images. Histograms of cellular aspect ratio (**D**) and cellular alignment (**E**) shows cells within oncostreams are elongated and aligned, whereas outside of oncostreams, they are rounded and not-aligned. **F)** Immunohistochemistry staining for Neurofilaments-L and Nestin in three independent tumors GEMM-NPA model and xenograft models (SJGBM2 human cells), showing that oncostreams are not specially organized alongside brain axonal pathways. Scale bars: 50  $\mu\text{m}$ . Arrowheads indicate the presence of Neurofilaments immunoreactivity.



Fig. S2

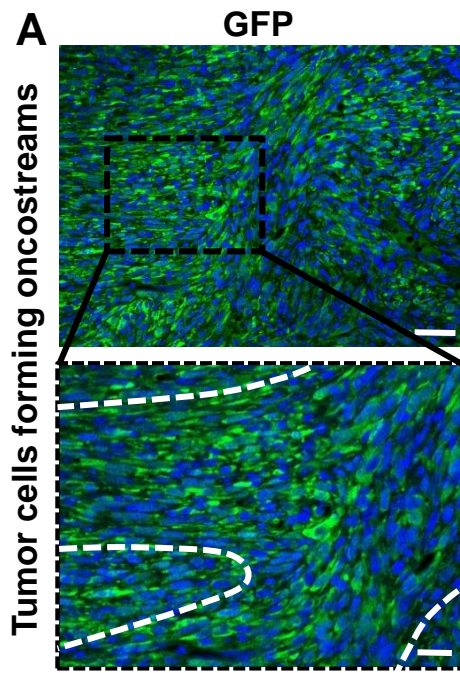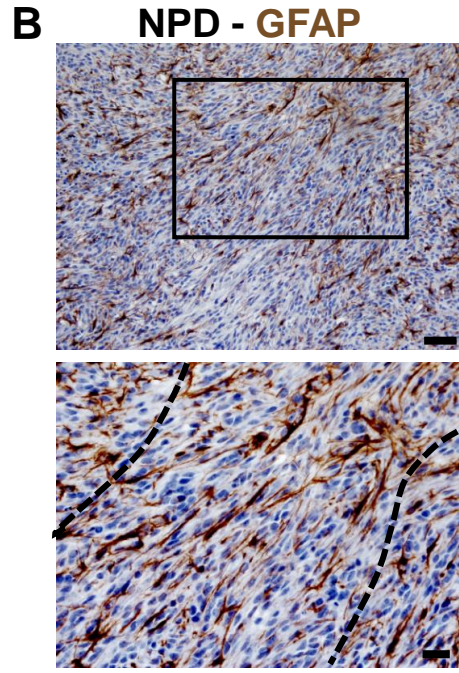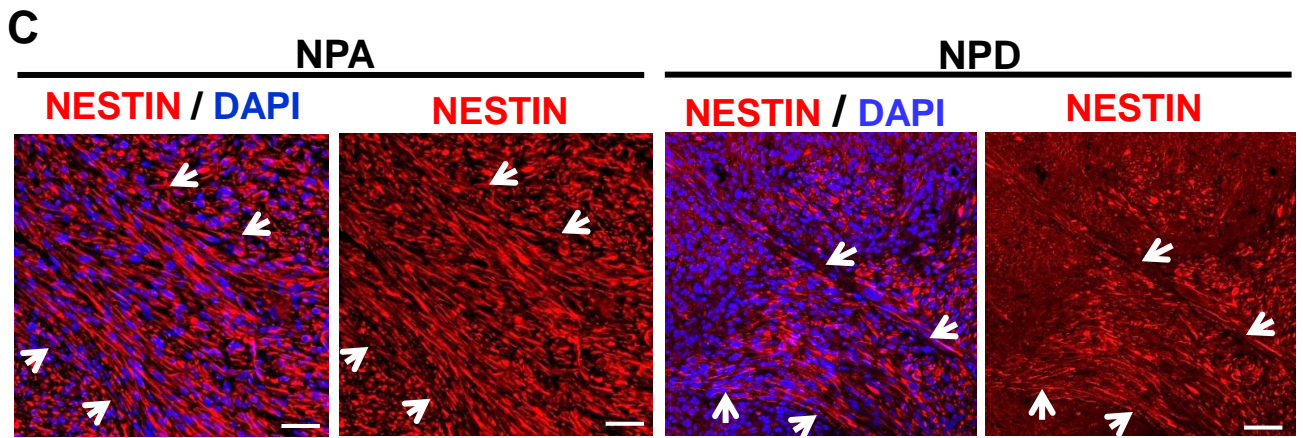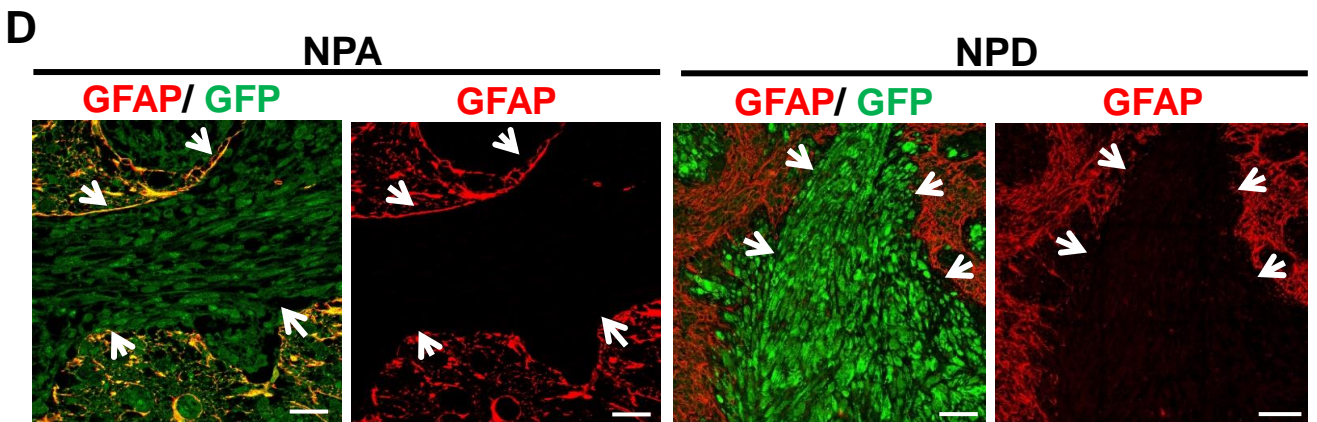



**Fig. S2: Oncostreams are formed by aligned tumor cells and include cells from the tumor microenvironment.**

Oncostreams' cellular heterogeneity was analyzed by immunofluorescence staining in three independent tumor samples of each model. **A)** GFP expression in NPA tumors show oncostreams formed by tumor cells (green = tumor cells; and blue = DAPI stained nuclei). Scale bar: 100  $\mu\text{m}$  (top) and 50  $\mu\text{m}$  (bottom). **B)** Immunohistochemistry analysis on GEMM of glioma (NPD) shows alignment of GFAP+ cells within oncostreams. Scale bars: 50  $\mu\text{m}$  (top) and 20  $\mu\text{m}$  (bottom). **C)** Representative confocal images of GEMM NPA and NPD glioma illustrates the presence of Nestin (red) within oncostreams. Nestin is a highly expressed marker in glioblastomas and expression correlate with tumor prognosis. Nuclei were stained with DAPI (left). Scale bar: 50  $\mu\text{m}$ . **D)** Confocal images of GEMM NPA and NPD glioma show the expression of GFP+ (green) in tumor cells within streams, and tumor microenvironment GFAP+ cells (red) surrounding the oncostream (right panel). GFAP, is expressed by reactive astrocytes or neoplastic astrocytes. Oncostreams either display GFAP+ cells throughout the structures (Fig. S2B) or surrounding the oncostreams (Fig. S2D). GFAP+ cells within oncostreams most likely are tumor cells, while GFAP+ cells surrounding oncostreams are reactive astrocytes. Scale bar: 50  $\mu\text{m}$ . Arrowheads indicate oncostreams areas surrounded by GFAP cells.

**Fig. S3**

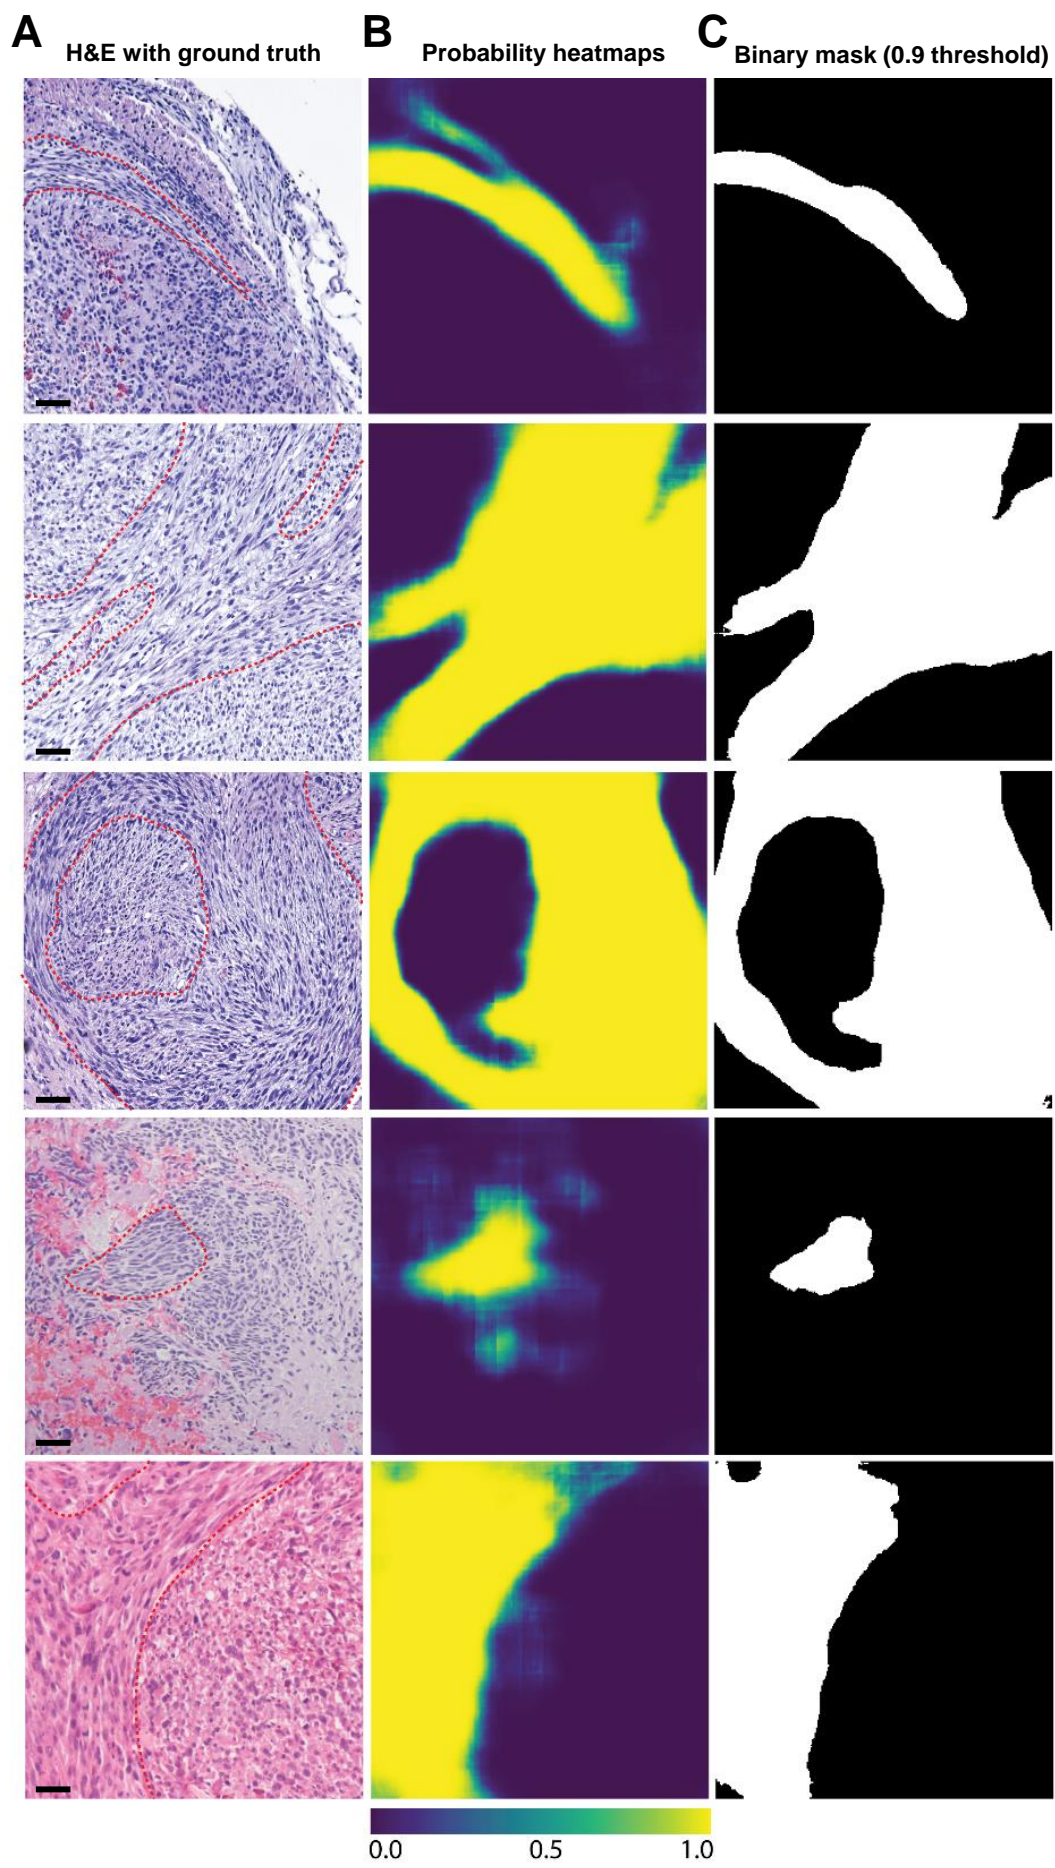

**Fig. S3: A deep learning model identifies oncostreams in mouse glioma H&E histological images.**

**A-C)** We implemented a U-Net architecture to provide semantic segmentation of oncostream fascicles in glioma histological sections. Independent tumor images (n=105) were used, and the experiment was repeated 6 times as shown in Fig. S4. **A)** Mouse Hematoxylin and Eosin (H&E) images are shown with oncostreams manually segmented (stippled/dashed red lines). Scale bar: 50  $\mu\text{m}$ . **B)** Model output is a semantic segmentation probability heatmap with each pixel being assigned a probability of being within an oncostream (foreground, yellow), or not (background, deep purple). Probability heatmaps for each corresponding H&E images are shown. **C)** Probability heatmaps can be converted to binary masks (foreground versus background) using probability thresholding. Oncostream binary masks with probability threshold of  $>0.9$  are shown. Threshold was tuned during validation as a hyperparameter.

**Fig. S4****A Mouse glioma tissue**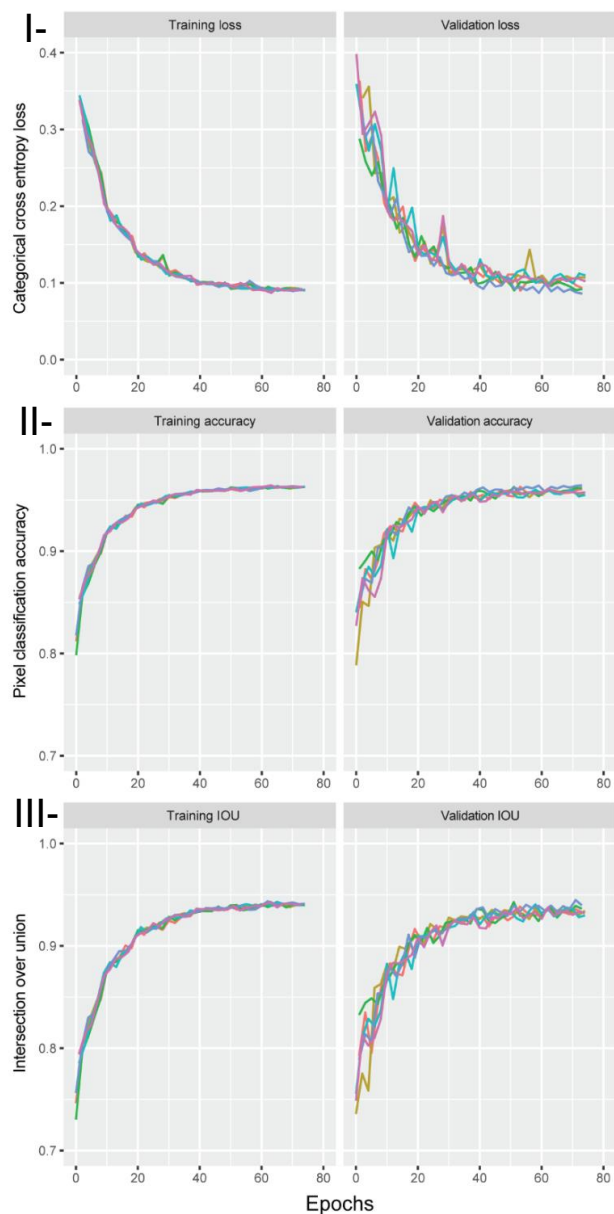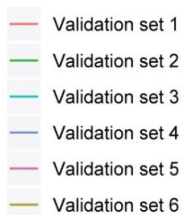**B TCGA gliomas**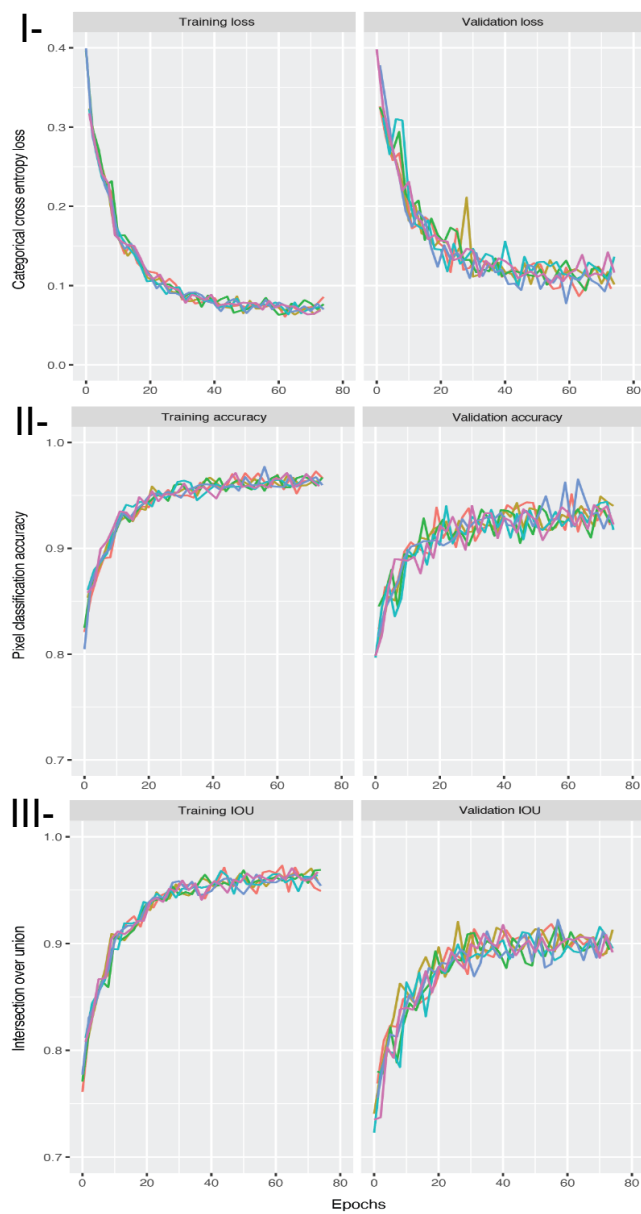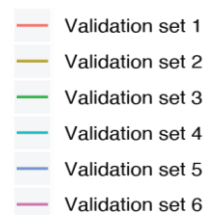

**Fig. S4. Training and validation curves. A-B)** Training and validation curves for a fully convolutional neural network trained using the mouse dataset (**A**) and TCGA dataset (**B**) are shown for the **(I)** cross entropy loss, **(II)** pixel classification accuracy, and **(III)** intersection over union (IOU) metric. We performed 6 iterations of random training-validation dataset splits (80%/20%) and held out the TCGA data for validation. Training and validation metrics stabilized after 75 epochs.



Fig. S5

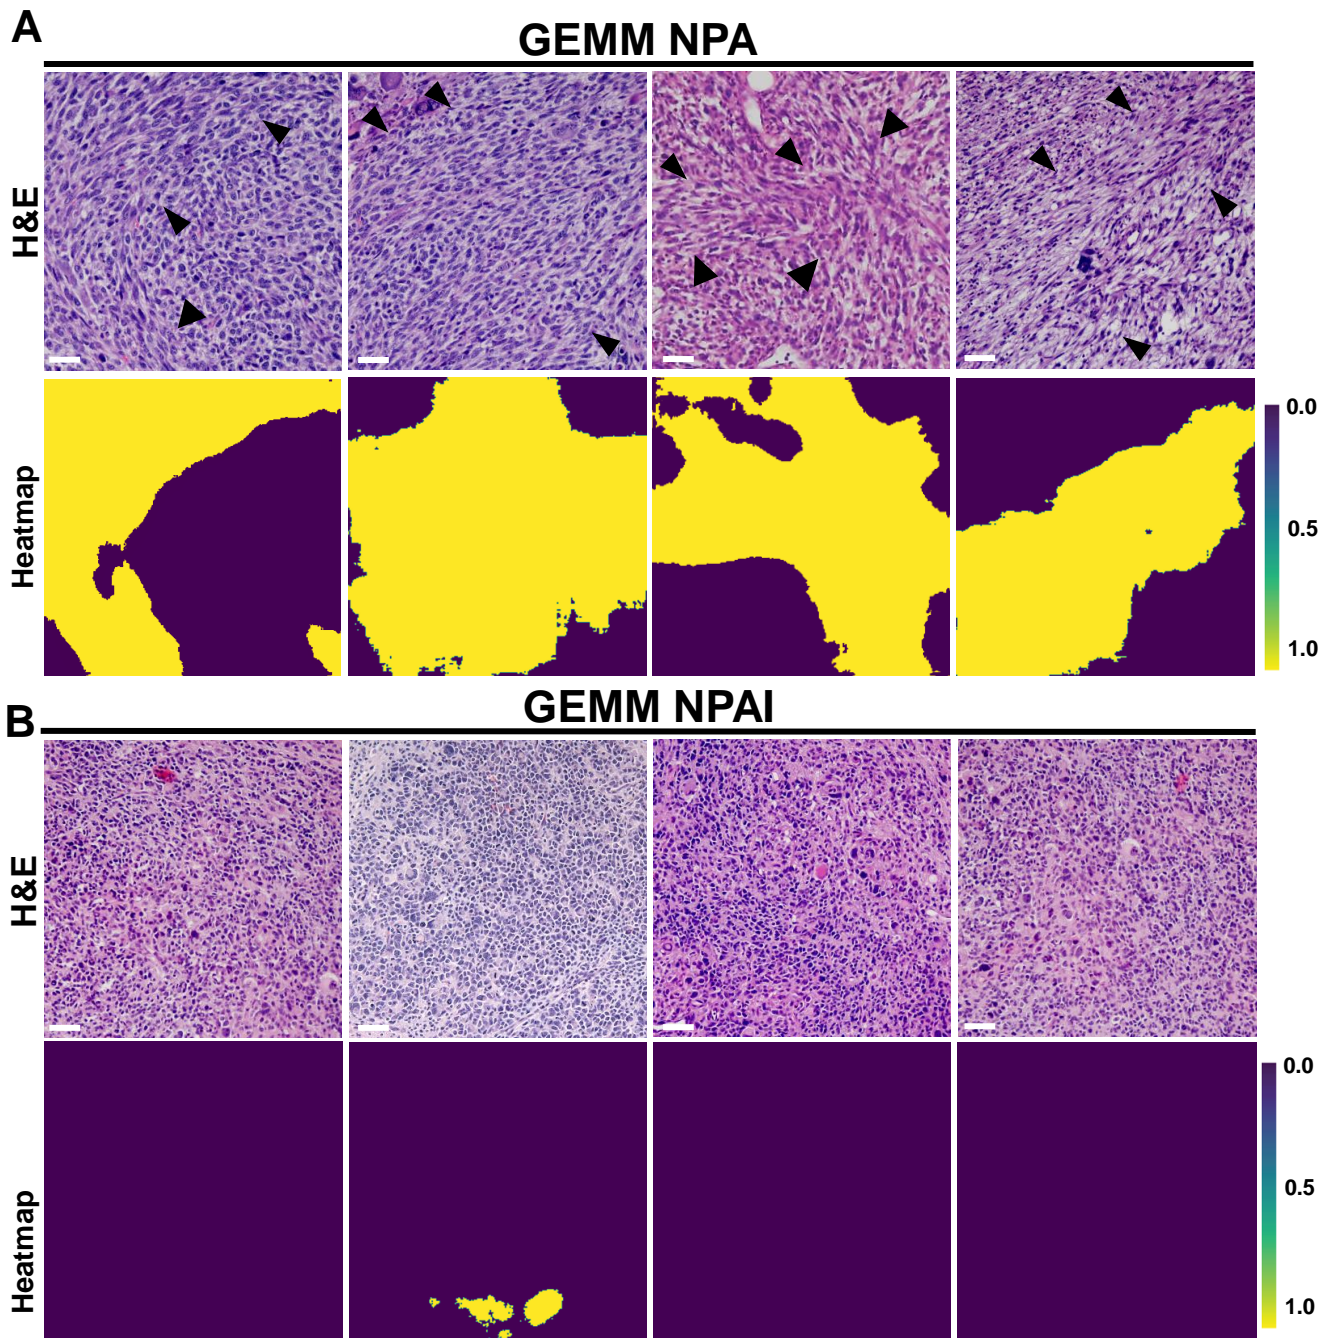

**Fig. S5: Schematic segmentation of oncostreams areas on IDH-WT (NPA) and IDH-Mutant (NPAI) mouse genetically engineered glioma model. A-B)** Representative images of oncostreams manually segmented on Hematoxylin and Eosin (H&E) stained sections of NPA (IDH-WT) gliomas (**A**) and NPAI (IDH-Mut) gliomas (**B**); (oncostreams are indicated with black arrowheads). Scale bar: 50  $\mu$ m. 'Heatmap' row illustrates the semantic segmentation probability heatmaps for each corresponding H&E image. Quantification of A and B is shown in Fig. 2D.

Fig. S6

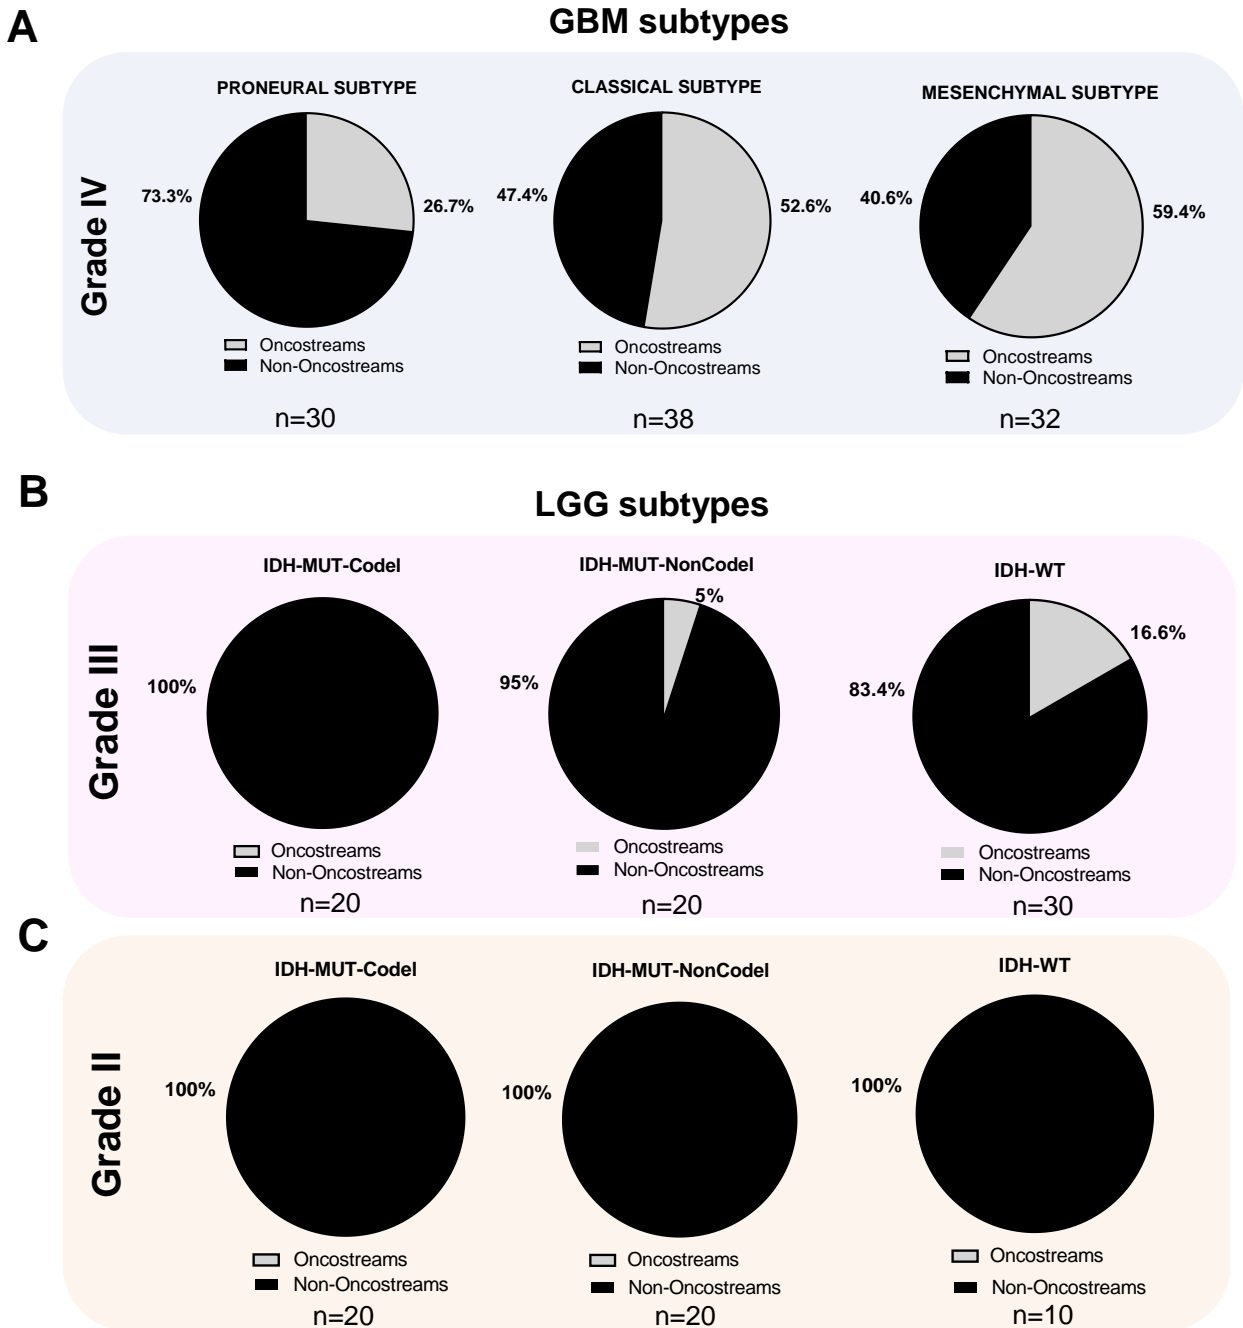

**Fig. S6. A)** Pie charts show percentage of tumors displaying oncostreams in GBM tumors (Grade IV) classified by molecular subtypes. Oncostreams are displayed in Proneural subtype (26.7%), Classical subtype (52.6%) and Mesenchymal subtype (59.4%) . **B)** Pie charts show percentage of tumors showing oncostreams in LGG tumors (Grade III) classified by molecular subtypes (IDH1-status and 1p-19q codeletion). Oncostreams are present in 5% of IDH1-Mutant-1p-19q-No-codeletion and in 16.6% of IDH1-WT tumors. **C)** Pie charts show percentage of tumors with oncostreams in LGG tumors (Grade II) classified by molecular subtypes (IDH1-status and 1p-19q codeletion). No oncostreams are observed in Grade II gliomas.

Fig. S7

A

Oncostreams (Grade IV) - H&E and Deep learning predictions

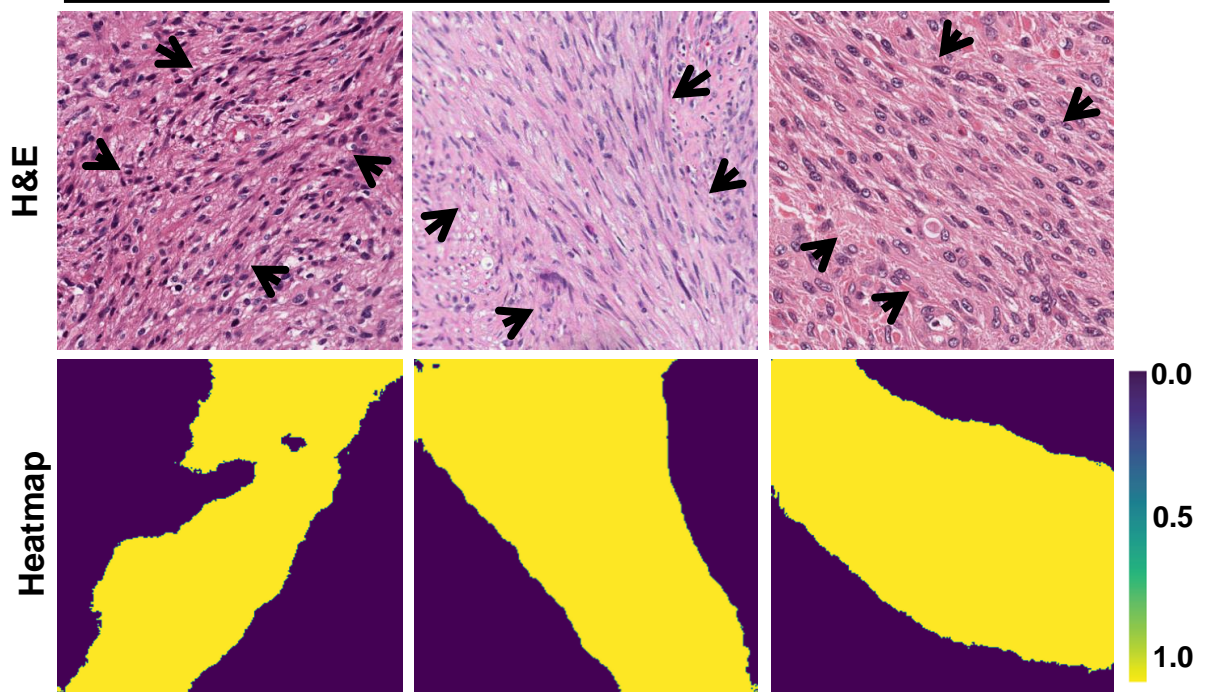

**Fig. S7: Oncostreams are identified by deep learning in human high-grade gliomas (Glioblastoma - Grade IV).** A) Representative Hematoxylin and Eosin (H&E) images of TCGA-glioblastoma multiforme (WHO Grade IV) diagnostic slides show the presence of manually segmented oncostreams (indicated by black arrows). Experiment was performed in 109 tumor sections as indicated in Fig. 3B-C. The second row shows semantic segmentation probability heatmaps for each corresponding H&E image.



**Fig. S8**

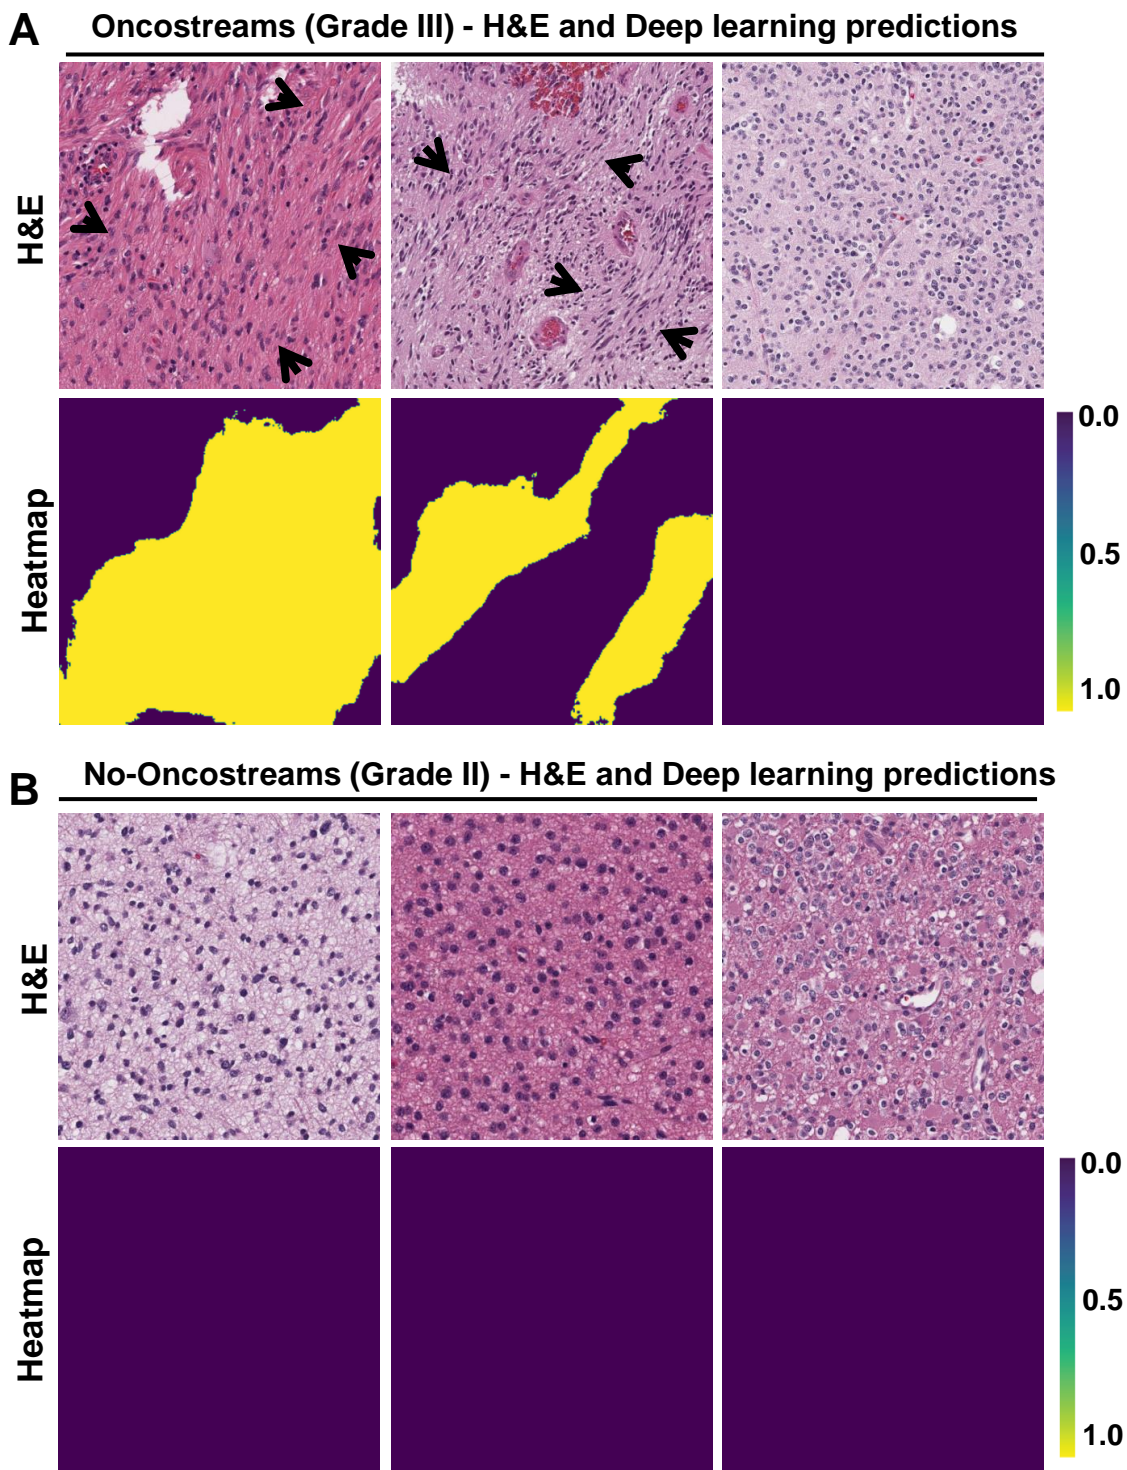

**Fig. S8: Oncostreams are observed in a low percentage of human gliomas WHO grade III but not in WHO grade II. A-B)** Representative Hematoxylin and Eosin (H&E) images of TCGA gliomas WHO Grade III (A) and Grade II (B) samples show the presence of manually segmented oncostreams (indicated by black arrows). Semantic segmentation probability heatmaps for each corresponding H&E image are shown in the row labeled 'heatmap'. Experiment was performed in 126 (grade II) and 61 (Grade II) tumor sections as indicated in Fig. 3B-C.



**Fig. S9**

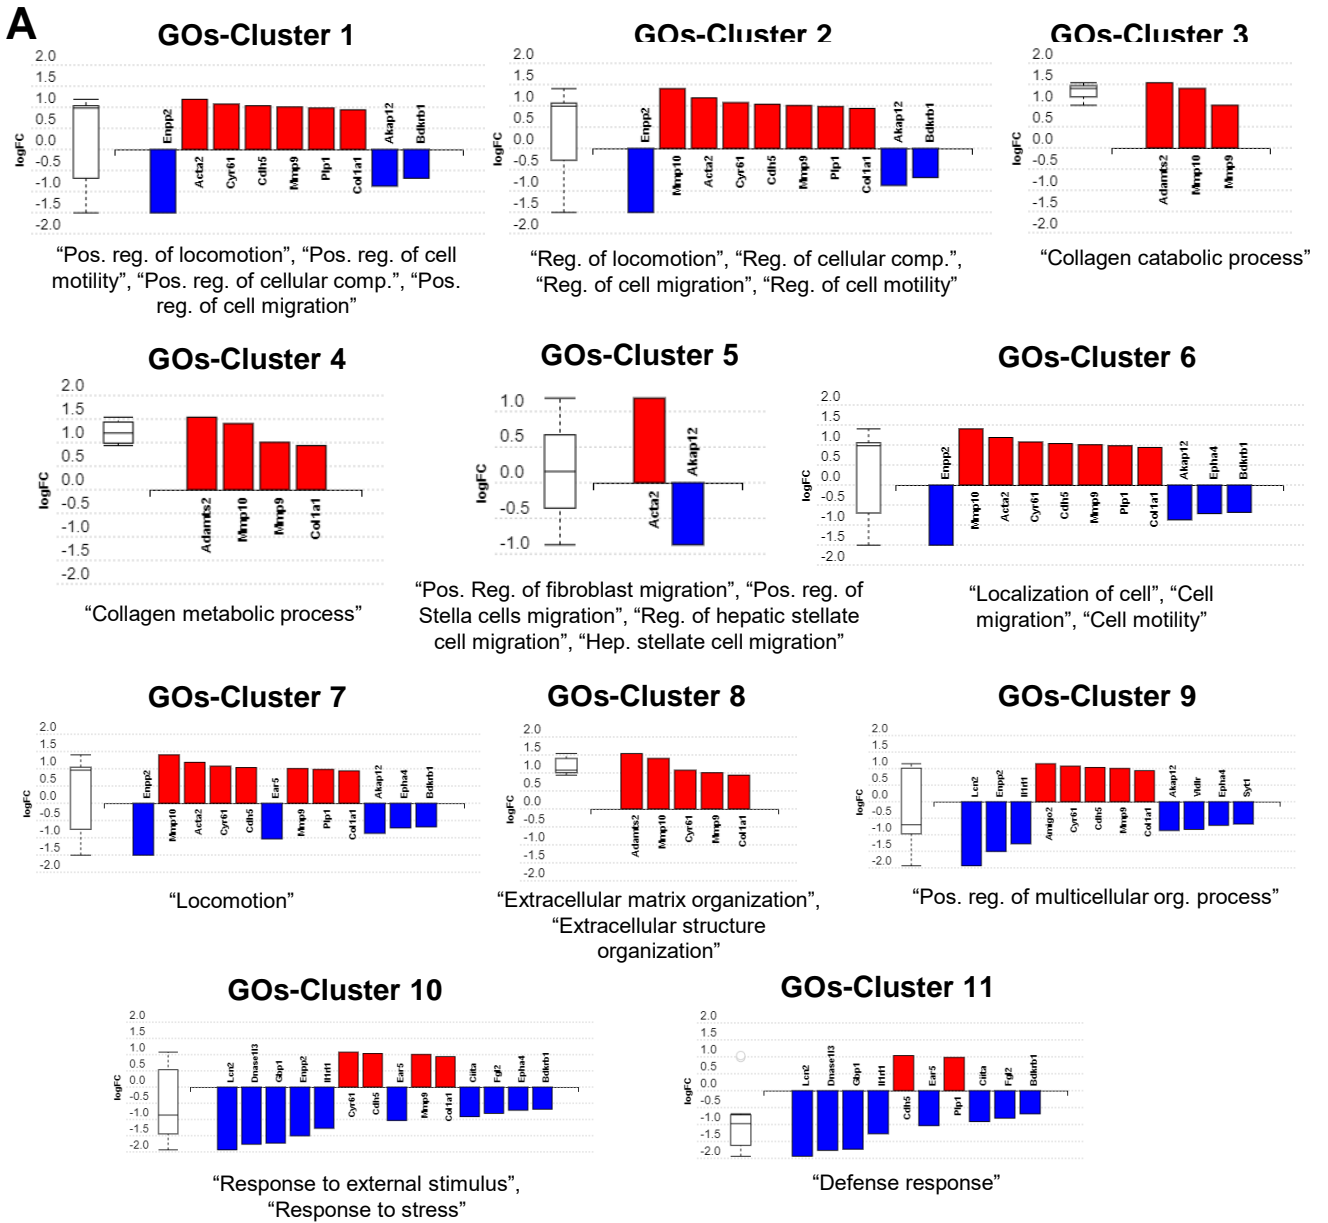

**B** **Dendrogram of GOs biological process**

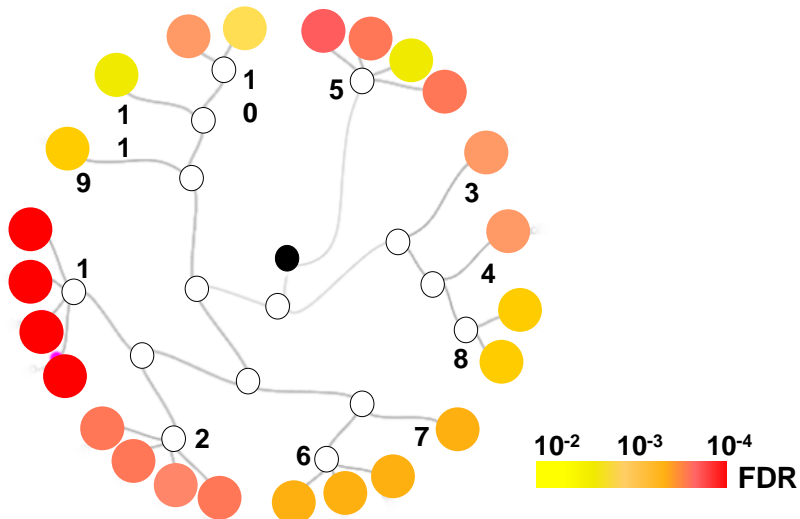

**Fig. S9. Enrichment in migration and extracellular matrix biological process suggest oncostreams are mesenchymal migratory structures.**

**A)** Bar graphs show clusters of enriched Gene Ontologies (GO) biological process sharing same differentially expressed genes. Pos: Positive, Reg: Regulation. Upregulated genes are shown in red, downregulated genes are shown in blue. Differentially Expressed (DE) genes have been determined using n=3 biologically independent replicates per group. The box and whisker plot on the left summarizes the distribution of all the differentially expressed genes in this pathway. Centre line of the boxplot is the median, upper bound of the boxplot is the Q3 (75th percentile), the lower bound of the boxplot is the Q1(25th percentile), the upper whiskers is the maximum value of the data (within 1.5 times the interquartile range over the 75th percentile), and the lower whisker is the minimum value of the data (within 1.5 times the interquartile range under the 25th percentile). Outliers are represented by circles. The data were analyzed using Advaita Bio's iPathwayGuide. **B)** Dendrogram of GOs biological process. Significant results are organized hierarchically based on overlap in associated DE genes. Node color (yellow to red:  $10^{-2}$  to  $10^{-4}$ ) represent significant differences (FDR corrected p-value), black dot represent the center of the dendrogram.

**Fig. S10**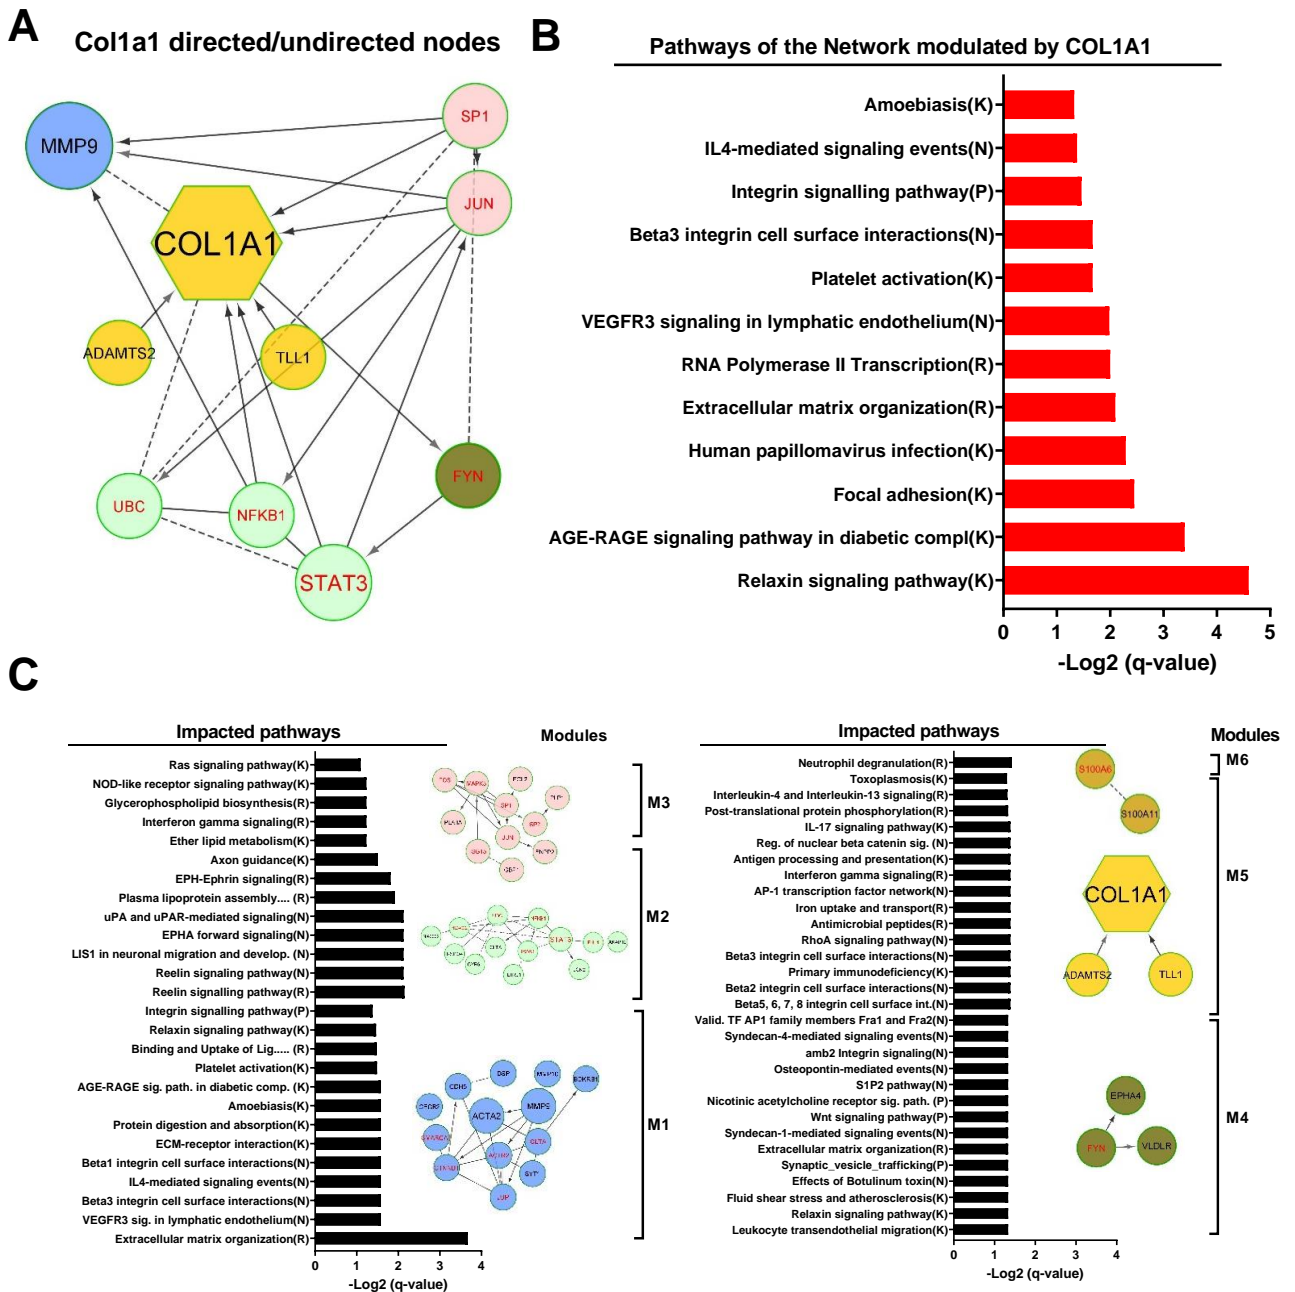

**Fig. S10. Pathway enrichment analyses of the COL1A1 network derived from DE genes of oncostreams vs no-oncostreams. A)** COL1A1 network showing its first neighbors. COL1A1 is a hub node with a degree of 9 interactions in the network (2nd most connected Differentially Expressed node). **B)** Functional enrichment analysis of the gene ontology (GO) terms of the COL1A1 network. The bar graph displays over-represented GOs biological process that include COL1A1. GO term significance was determined by a cutoff of q-value (FDR) < 0.05. GO terms were plotted against the minus Log 2 of the q-value (FDR). **C)** Functional enrichment analysis of the impacted pathways in each module of the network. Modules (nodes of the same color) represent a highly interacting group of genes in the network. The bar graph shows the overrepresented pathways plotted according to the minus Log<sub>2</sub> q-value (FDR). Pathway-selection cutoff was set at a q-value (FDR) < 0.05.

A

TCGA - COL1A1 expression in glioma tumors

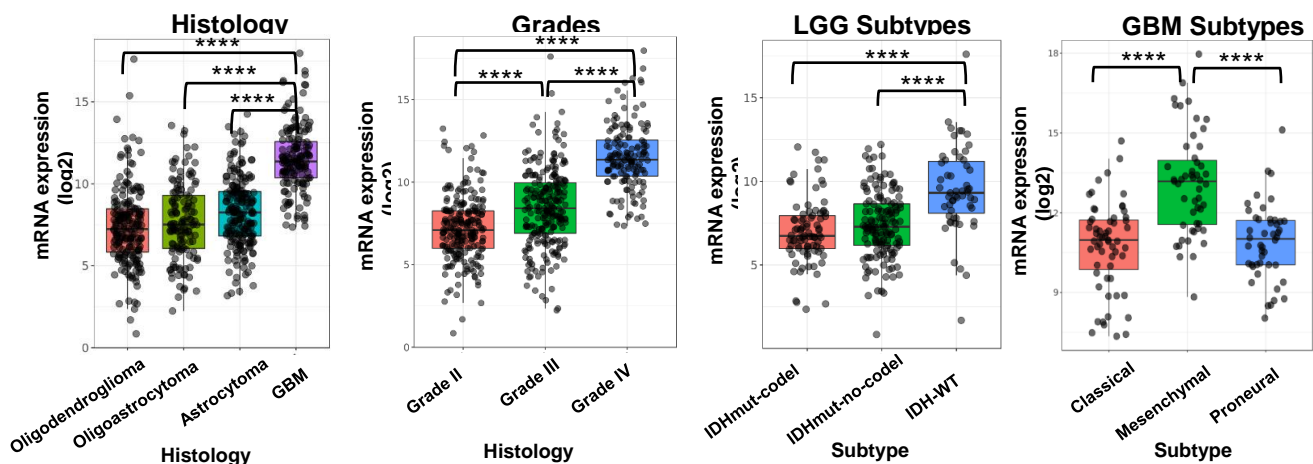

B

TCGA - GBM Subtypes survival based on COL1A1 expression

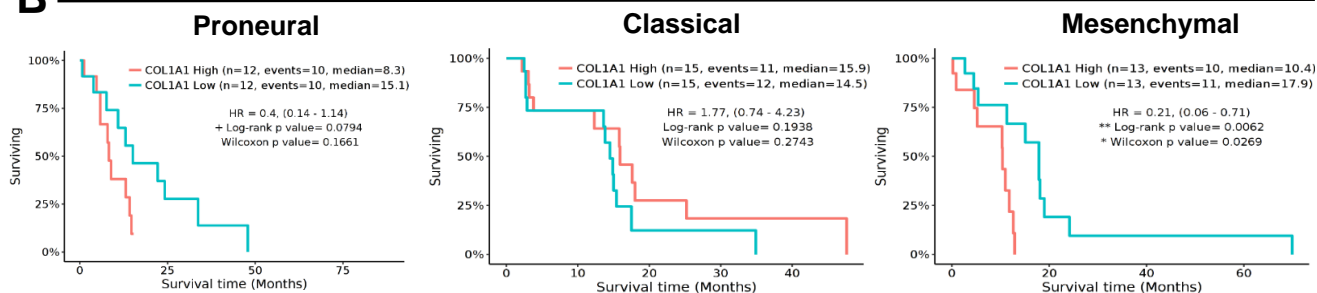

**Fig. S11. Evaluation of COL1A1 expression levels associated with human glioma aggressiveness and clinical outcomes. A)** mRNA expression analysis of COL1A1 related to glioma tumor histology, grade and LGG-subtypes and GBM-subtypes (TCGA-GBMLGG database). Graph shows the log<sub>2</sub> mRNA expression levels. Centre line of the boxplot is the median, upper bound of the boxplot is the Q3 (75th percentile), the lower bound of the boxplot is the Q1(25th percentile), the upper whiskers is the maximum value of the data (within 1.5 times the interquartile range over the 75th percentile), and the lower whisker is the minimum value of the data (within 1.5 times the interquartile range under the 25th percentile). Statistical significance of the data set was calculated using One-way ANOVA test and multiple comparison Tukey test, \*\*\*\*p<0.0001. Histology (GBM: n=152, Astrocytoma: n=194, Oligodendroglioma: n=191, Oligoastrocytoma: n=130). Grades (Grade II: n=226, Grade III: n=244, Grade IV: n=152). GBM subtypes (Proneural: n=46; Mesenchymal: n=51; Classical: n=59). LGG Subtypes (IDHwt: n=54; IDHmut-codel: n=85, IDHmut-no-codel: n=141). **B)** Kaplan-Meier survival curves of GBM patients comparing COL1A1 high (red) vs low (blue) expression in GBM molecular subtypes (TCGA-GBMLGG database). Data was analyzed from the Gliovis website (<http://gliovis.bioinfo.cnio.es>). GBM tumors with high COL1A1 expression show a significant increased survival compared to GBM COL1A1 low within the mesenchymal subtype.

**Fig. S12**

**A**

| shRNA      | Sequence               |
|------------|------------------------|
| Scramble   | GAATCTAATCGTATCGTGGCTG |
| shCol1a1-A | CCCTGGTGATACTGGTGTAA   |
| shCol1a1-B | GCAACAGTCGCTTCACCTACA  |
| shCol1a1-C | GCAAGACAGTCATCGAATACA  |

**B**

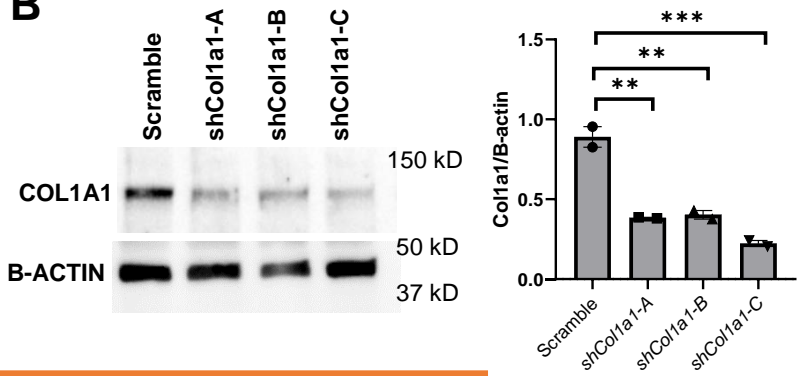

**C**

| Tumor Model | Genetic Modifications                                             |
|-------------|-------------------------------------------------------------------|
| NPA         | <i>Nras</i> -GV12/ <i>shP53</i> / <i>shATRx</i>                   |
| NPashCol1a1 | <i>Nras</i> -GV12/ <i>shP53</i> / <i>shATRx</i> / <i>shCol1a1</i> |
| NPD         | <i>Nras</i> -GV12/ <i>shP53</i> / <i>PDGFβ</i>                    |
| NPDshCol1a1 | <i>Nras</i> -GV12/ <i>shP53</i> / <i>PDGFβ</i> / <i>shCol1a1</i>  |

**D**

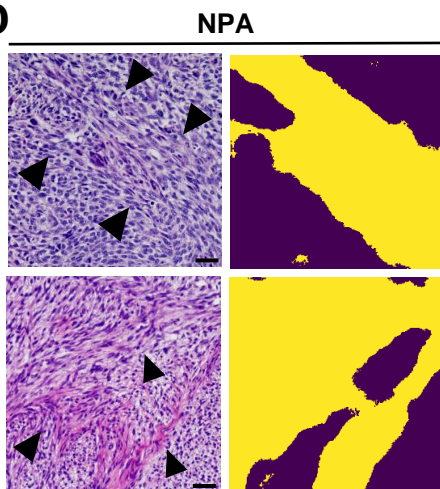

**E**

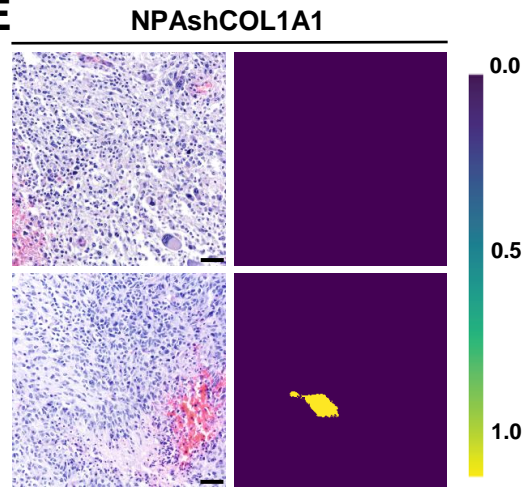

**F**

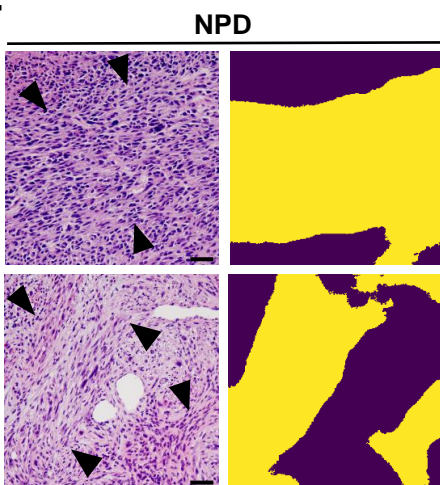

**G**

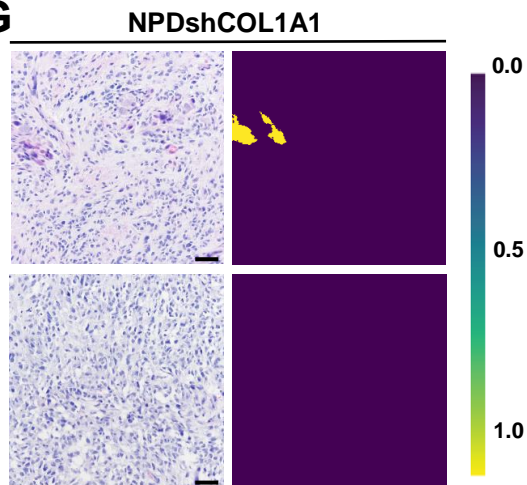

**Fig. S12. Genetically engineered mouse glioma models for COL1A1 knockdown.**

**A)** Scramble and shRNAs sequences. These oligonucleotides were cloned in PT2 vectors. **B)** Western Blot (WB) analysis shows downregulation of COL1A1 expression levels in NIH-3T3 mouse cells transfected for 72 hours with the corresponding vectors (Scramble control and 3 different shRNAs). Bar graphs represent the quantitative analysis of the WB. Values were calculated by normalizing COL1A1 expression to  $\beta$ -actin. Quantification was performed using ImageJ software. Statistical significance was determined using One-way ANOVA test. Graphs present mean  $\pm$ SEM. n=2 biologically independent samples. Scramble vs. shCol1a1-A \*\*p=0.0013; Scramble vs. shCol1a1-B \*\*p=0.0015; Scramble vs. shCol1a1-C \*\*\*p=0.0005. Experiment was repeated two times. **(C)** Genetic modifications used to induce different mouse glioma models. **D-G)** Representative images of oncostreams manually segmented on Hematoxylin and Eosin (H&E) stained sections of genetically engineered mouse models NPA (**D**), NPashCOL1A1 (**E**), NPD (**F**) and NPDshCOL1A1 (**G**) gliomas (oncostreams are indicated with black arrowheads). Scale bar: 50  $\mu$ m. Heatmap outputs illustrate the semantic segmentation probability heatmaps for each corresponding H&E image. Quantitative analysis of D-G is shown in Fig. 5K.

Fig. S13

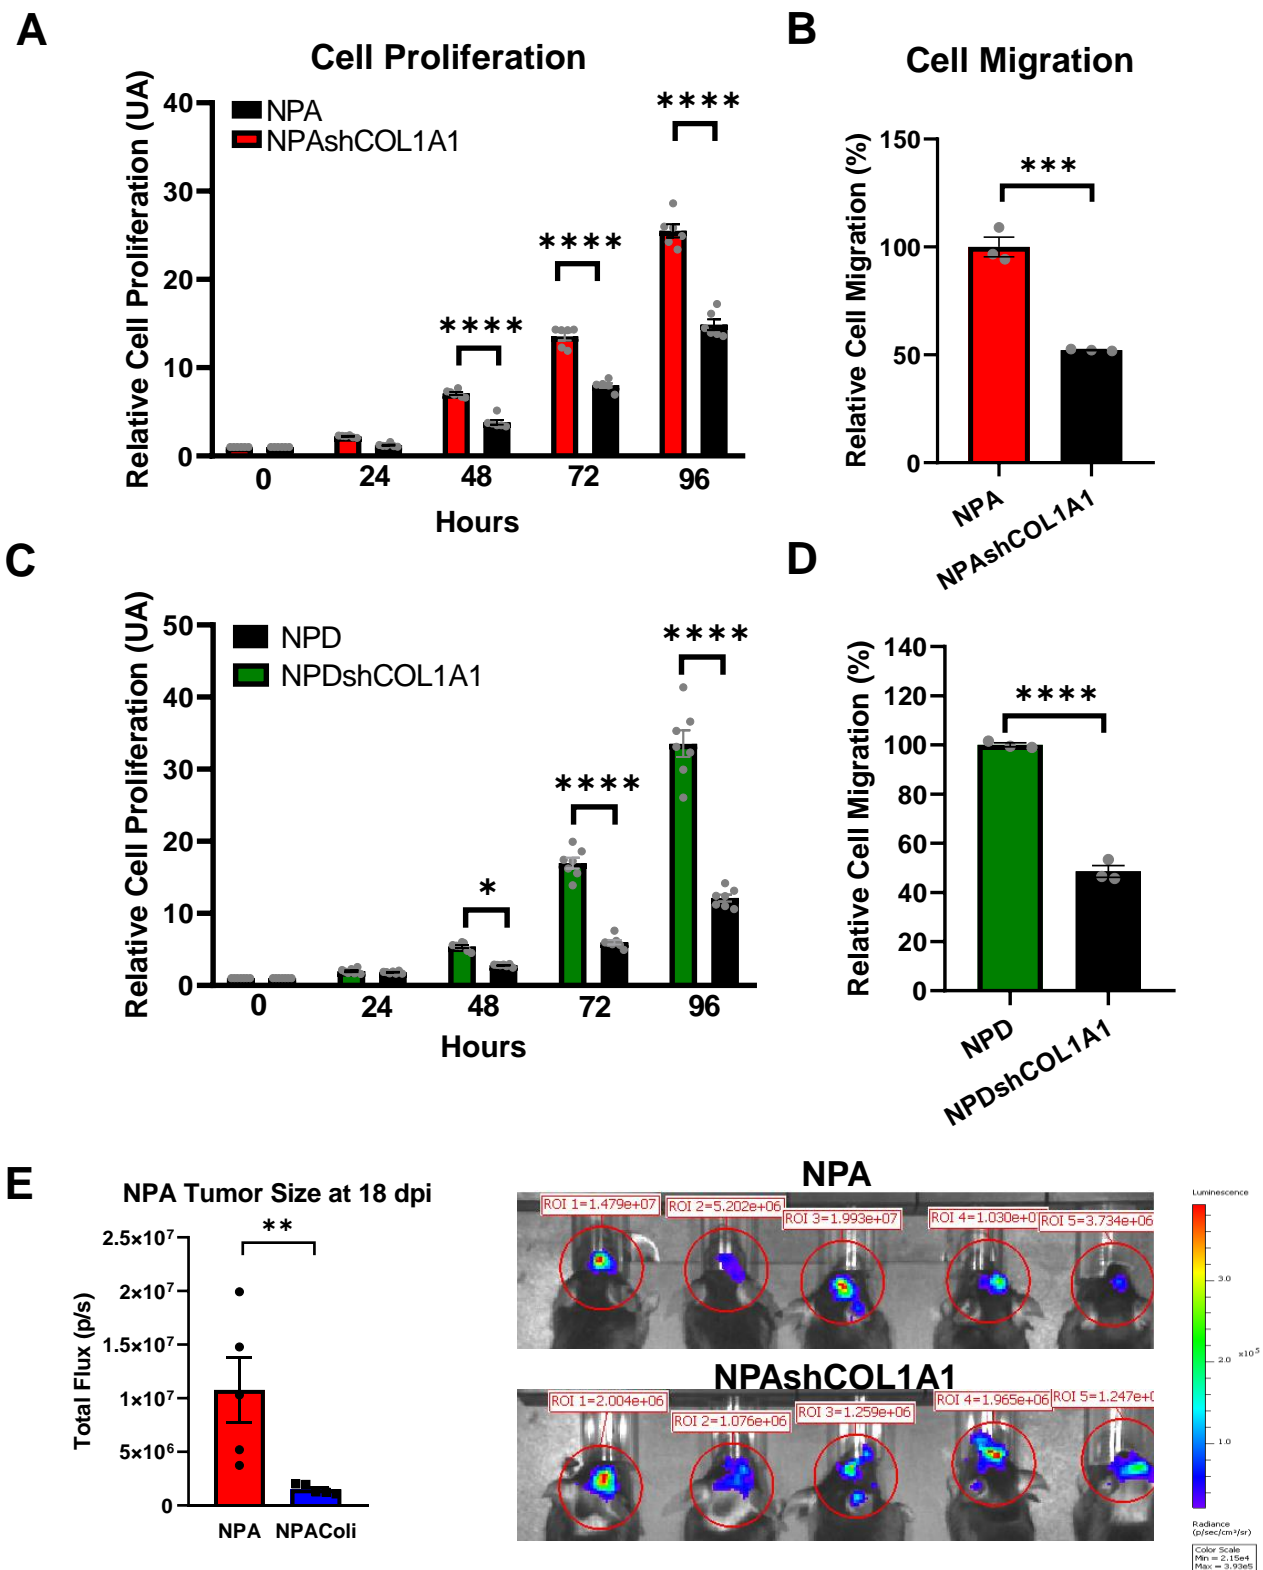



**Fig. S13. Downregulation of COL1A1 decreases cell proliferation and cell migration *in vitro*, and tumor growth *in vivo*.**

Neurospheres obtained from genetically engineered mouse models (GEMM) of glioma controls (NPA and NPD) and COL1A1 downregulation (NPAshCOL1A1 and NPDshCOL1A1) were employed to determine cell proliferation and cell migration. **A** and **C**) Cell proliferation was assessed at 0, 24, 48 and 96 h (n=6 biologically independent samples) and was determined using Cell Titer-Glo Assay. Graphs present mean  $\pm$ SEM. Two-way ANOVA with Sidak multiple comparisons. \*p=0.0365, \*\*\*\*p<0.0001. **B** and **D**) Cell migration was measured after 15 h using transwell assay, and number of cells was determined using Cell Titer-Glo Assay. Data are expressed as percentage of migrating cells relative to the control. Graphs present mean  $\pm$ SEM. Biologically independent samples n=3,\*\*\*p=0.0005, \*\*\*\*p<0.0001. **E**) Tumor growth was determined measuring *in vivo* luminescence of C57BL mice bearing NPA or COL1A1 downregulation (NPAshCOL1A1) at 18 days post-implantation (n=5 biologically independent replicates). Graphs present mean  $\pm$ SEM. Mann Whitney two-sided t-test, \*\*P=0.0079.



Fig. S14

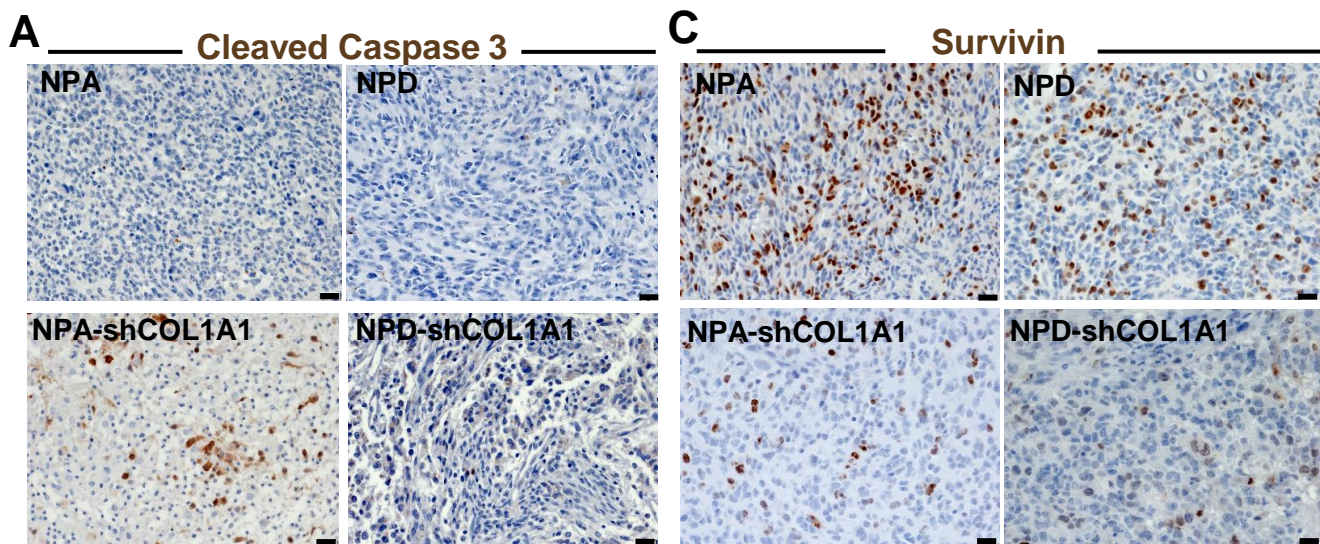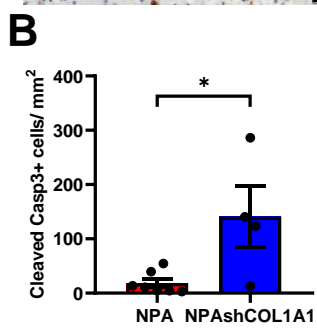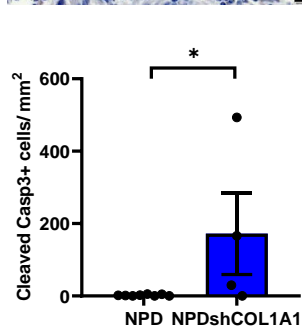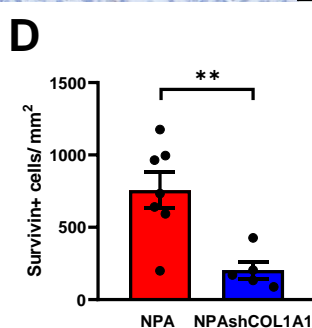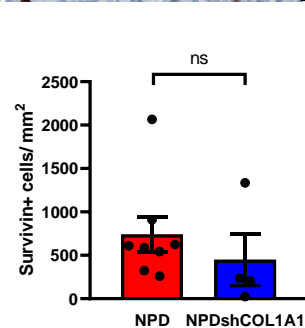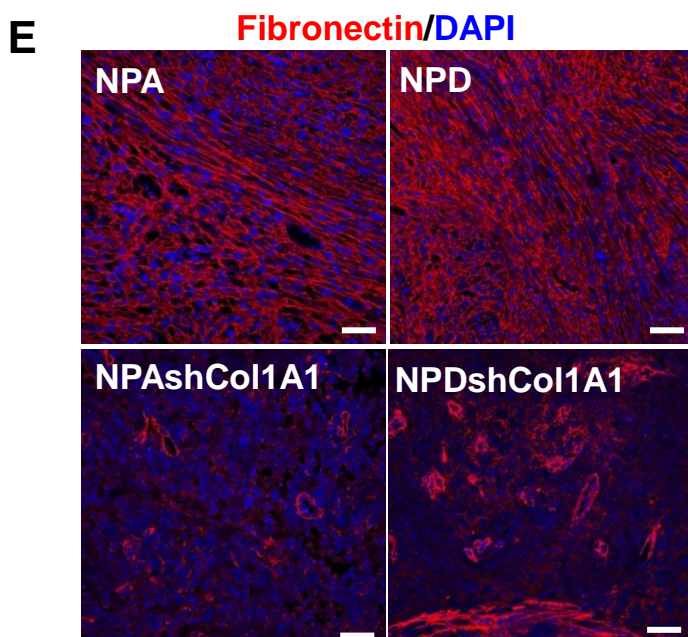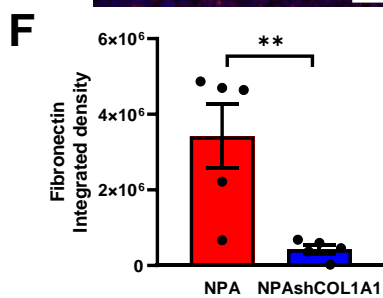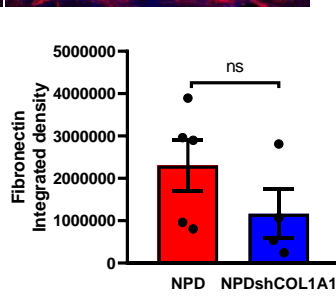

**Fig. S14. COL1A1 genetic downregulation induced changes in apoptosis and decreased the expression of the mesenchymal marker fibronectin.**

Immunohistochemical analysis (**A** and **C**) on genetically engineered mouse models (GEMM) of glioma controls (NPA and NPD) and COL1A1 downregulation (NPAshCOL1A1 and NPDshCOL1A1). **A**) Representative images of Cleaved Caspase 3 expression (DAB). Scale bar: 20  $\mu\text{m}$ . **B**) Bar graphs represent Cleaved Caspase 3+ cells quantification (number of cell/ $\text{mm}^2$ ) using QuPath positive cells detection. Graphs present mean  $\pm$ SEM, (NPA: n=7, NPAshCOL1A1: n=4, NPD: n=8, NPDshCOL1A1: n=4), Mann Whitney two-sided t-test, NPA vs NPAshCOL1A1 \*p=0.0424. Two-sided t-test, NPD vs NPDshCOL1A1 \*p=0.0484. **C**) Representative images of Survivin expression (DAB). **D**) Bar graphs represent Survivin+ cells quantification (number of cell/ $\text{mm}^2$ ) using QuPath positive cells detection. Graphs present mean  $\pm$ SEM, (NPA: n=7, NPAshCOL1A1: n=5, NPD: n=8, NPDshCOL1A1: n=4), two-sided t-test, \*\*p=0.005, ns: no significant. **E**) Immunofluorescence analysis on GEMM of glioma controls (NPA and NPD) and COL1A1 downregulation (NPAshCOL1A1 and NPDshCOL1A1). Representative images of Fibronectin expression in red (Alexa 555) and nuclei in blue (DAPI). Scale bar: 50  $\mu\text{m}$ . **F**) Bar graphs represent Fibronectin quantification in terms of fluorescence integrated density. Graphs present mean  $\pm$ SEM, (NPA: n=5, NPAshCOL1A1: n=5, NPD: n=5, NPDshCOL1A1: n=4), two-sided t-test, \*\*p=0.0079, ns: no significant.



**Fig. S15**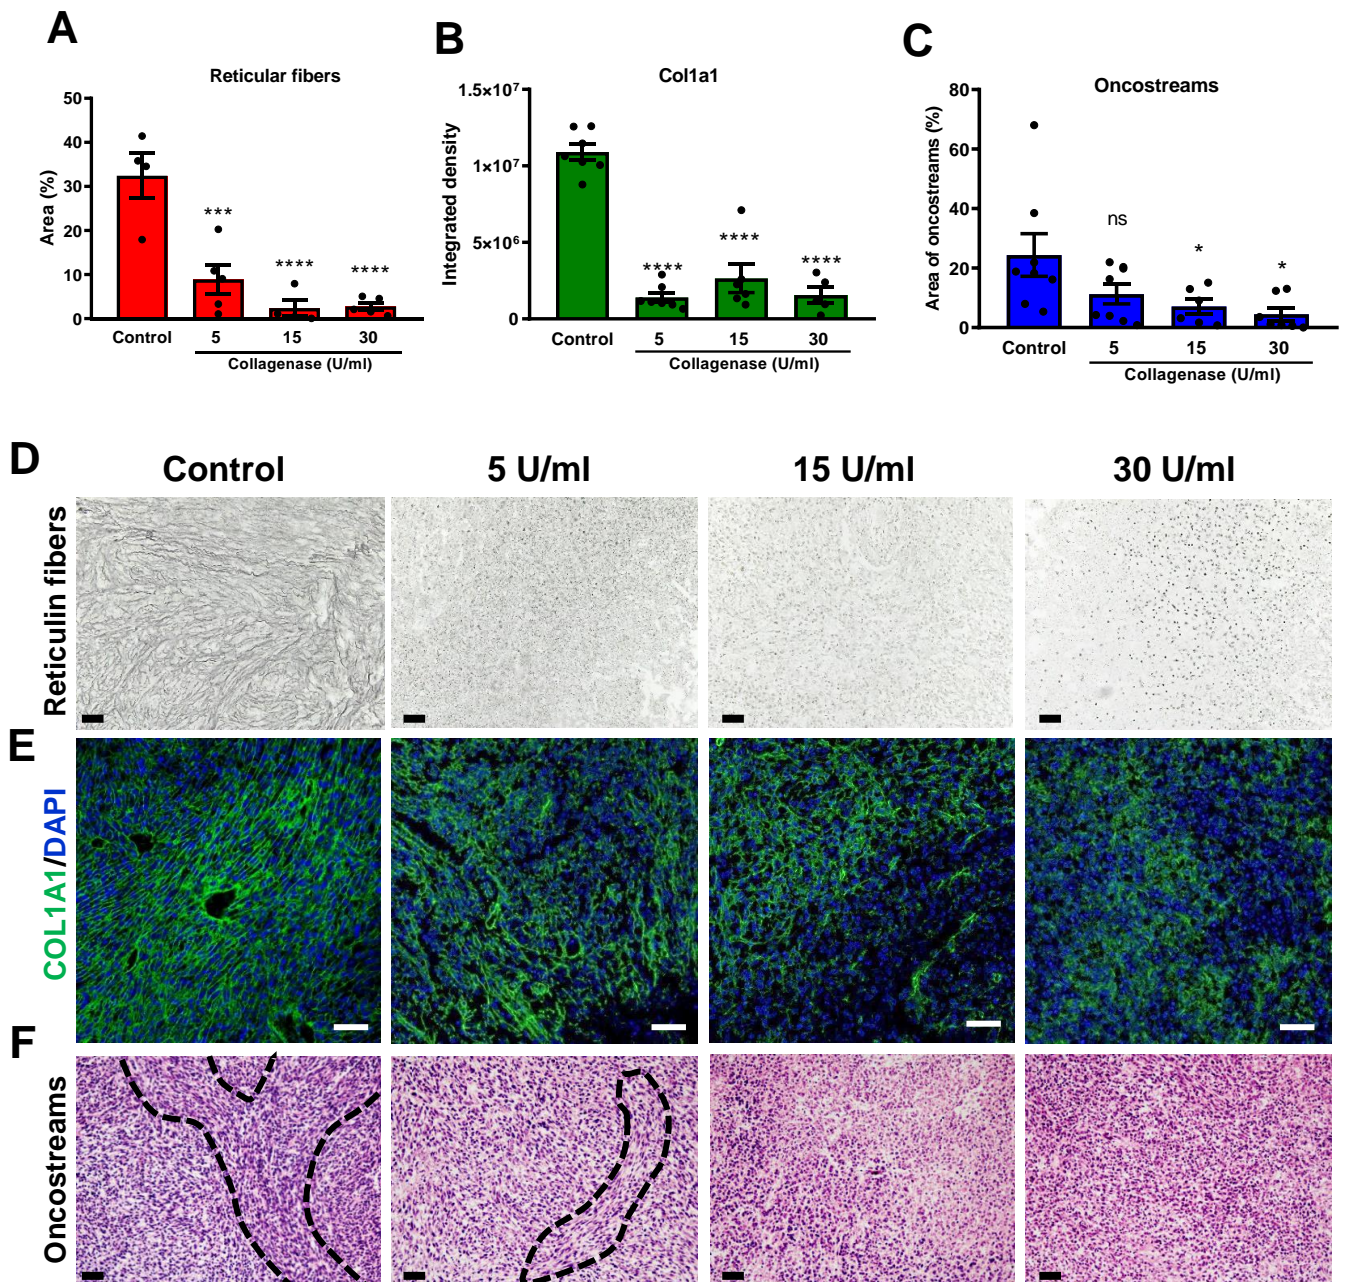

**Fig. S15. Collagenase treatment depletes deposited collagen fibers and eliminated oncostream mesenchymal fascicles.** **A-F)** Explant glioma brain slides were treated with different concentrations of collagenase (5 U/ml, 15 U/ml and 30 U/ml) for 48 hours. **A)** Bar graphs show the quantification of reticular fibers (Reticulin Silver Plating Kit acc. to Gordon & Sweets). Graphs present mean  $\pm$ SEM. Control: n=8, 5 U/ml: n=8, 15 U/ml: n=6, 30 U/ml: n=7. One-way ANOVA, \*\*\*p=0.003, \*\*\*\*p<0.0001. **B)** Bar graphs represent COL1A1 quantification in terms of fluorescence integrated density. Error bars represent  $\pm$ SEM. Control: n=7, 5 U/ml: n=7, 15 U/ml: n=6, 30 U/ml: n=5. One-way ANOVA, \*\*\*\*p<0.0001. **C)** Identification and quantification of oncostream areas using Image J. Graphs present mean  $\pm$ SEM. Control: n=8, 5 U/ml: n=8, 15 U/ml: n=6, 30 U/ml: n=7. One-way ANOVA, Control vs 15 U/ml \*p=0.0433, Control vs 30 U/ml \*p=0.0133, ns: no significant. **D-F)** Representative images display reticular fiber expression and organization (**D**); COL1A1 expression and organization in green (Alexa 488) and nuclei in blue (DAPI) (**E**); and Hematoxylin and Eosin stained paraffin sections (**F**). Images (20x objective) Scale bars: 50  $\mu$ m.

Fig. S16

A

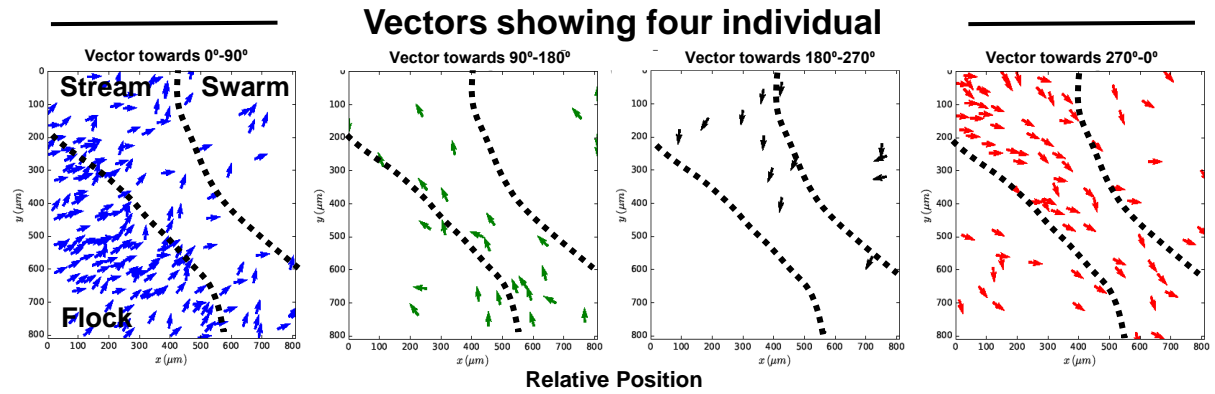

B

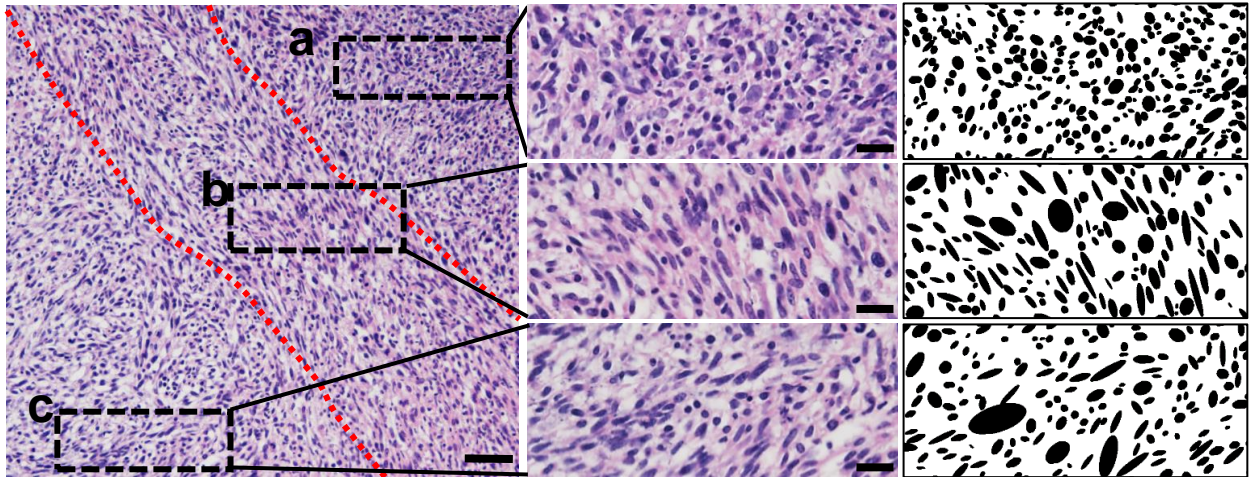

C

D

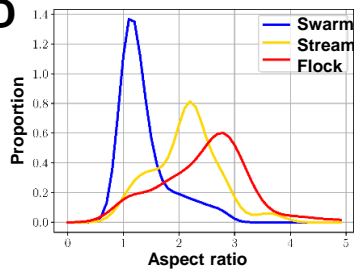

E

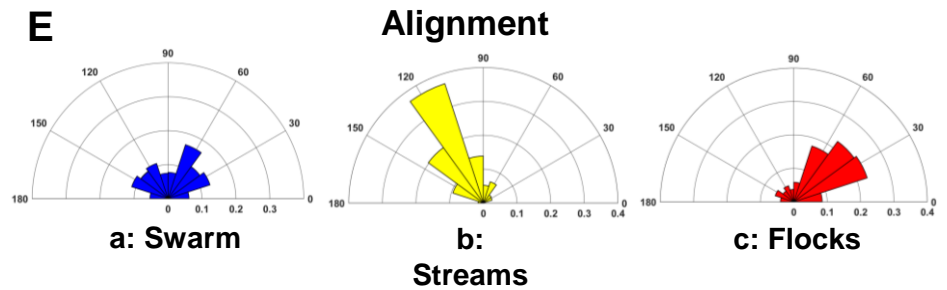

F

Predictive patterns of collective motion

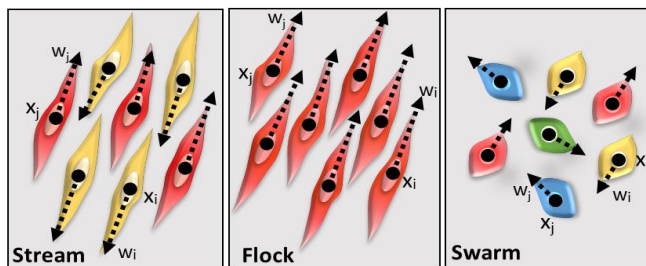

**Fig. S16. Dynamic patterns are aligned to cellular morphology and histological features in gliomas.** **A)** Vectors indicating average direction per cell for each area (from Fig. 7B-D). **B)** Hematoxylin and Eosin (H&E) staining of a 5  $\mu\text{m}$  microtome section taken from an explant slice culture glioma model used for confocal imaging and shown in **Fig. 7B**. Dotted white lines define different zones which display different dynamic patterns in **Fig. 7D**, i.e., a=swarm, b=stream and c=flock, and boxes are shown at higher power to the right. This experiment was repeated at least three times. Scale bar: 50  $\mu\text{m}$ . Inset scale bar: 20  $\mu\text{m}$  **C)** Masks generated by particle analysis in Image J were used to calculate the alignments shown in Fig. 2D. **D)** Histogram of cell eccentricity analysis of organotypic H&E stained glioma sections. Aspect ratio of cells are shown for a swarm (blue;  $\sim 1$ ), a stream (yellow;  $>2$ ) and a flock (red;  $>2$ ). **E)** Alignment analysis of cells: Angle histogram plots show areas of high proportion of aligned cells (stream and flock) (narrow range of angle orientation), and areas of no preferred orientation (swarm). **F)** Dynamic self-organizing collective motion patterns predicted by our *in silico* agent-based modeling, in which cell eccentricity and density determine pattern formation: 1. Stream ( $\uparrow\downarrow$ ), 2. Flock ( $\uparrow\uparrow$ ), 3. Swarm ( $\downarrow\leftrightarrow$ ). Figure was created by the authors.



Fig. S17

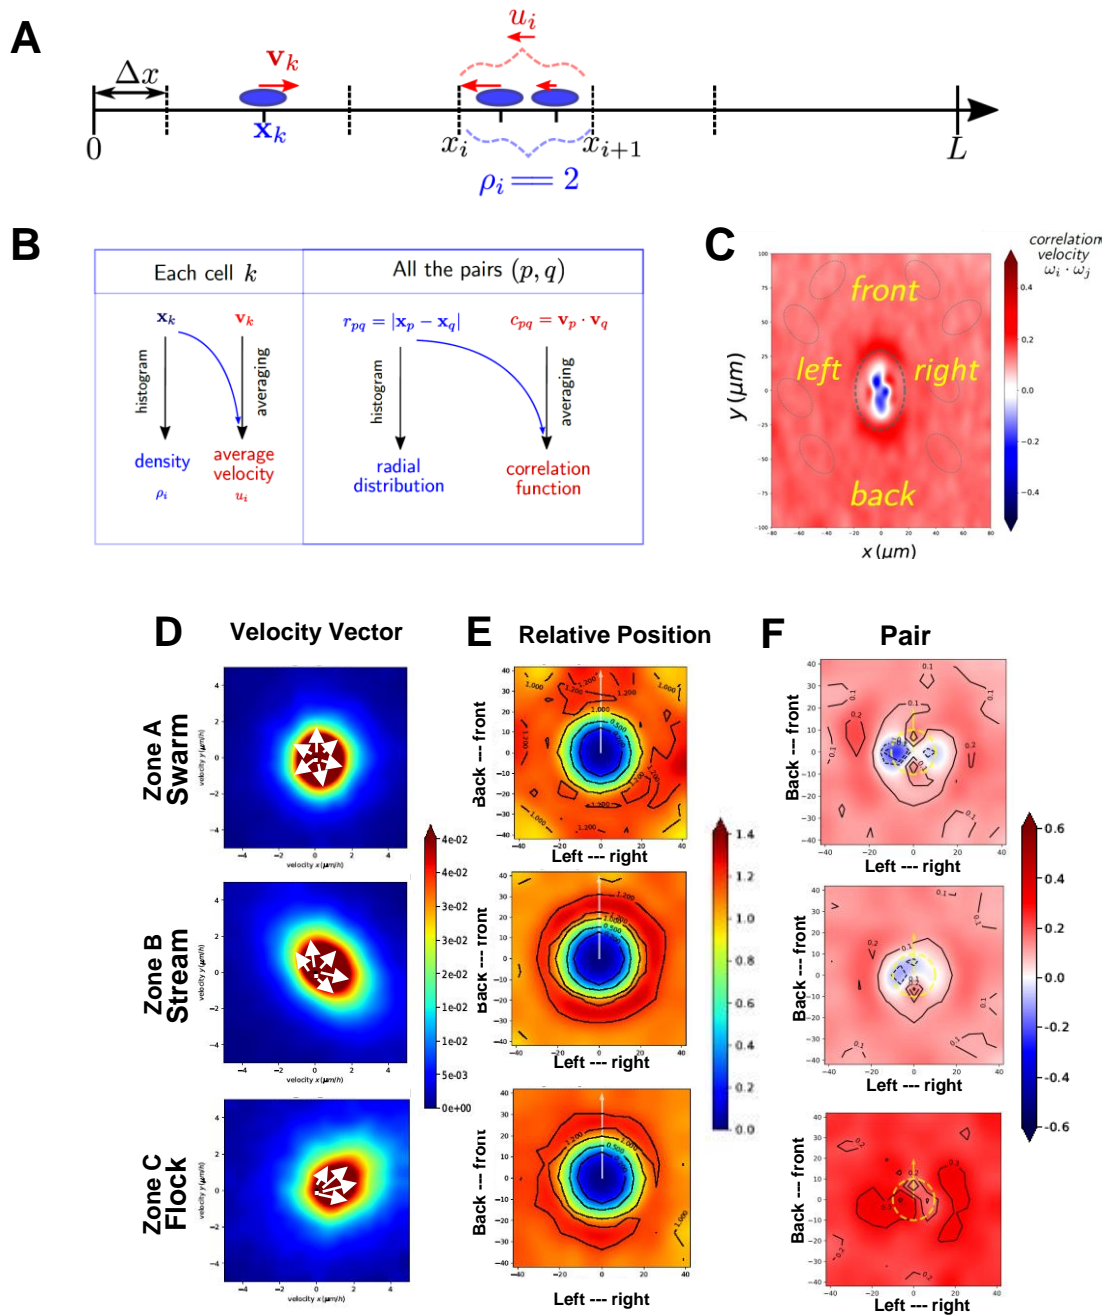



**Fig. S17: Statistical analysis performed to study glioma dynamics.**

**A)** Correlation functions: estimation of the density  $\rho_i$  and average velocity  $u_i$ . **B)** Radial distribution and correlation function are estimated in the same way as density and average velocity, but we use pairwise information (e.g., distances between neighbors). **C)** Heat map plot of the pair wise correlation of the velocity. We estimated the correlation depending on the position of a nearby  $x_j$  in different positions (front-to-back and left-to-right). Positive correlation (+) indicates cells are moving in same directions (red) and negative correlation (-) cells are moving in opposite directions (blue). **D)** Heat map plot of the distribution of the velocity vector in different zones of the tumor core. Velocity is shown in the x-axis and y-axis in  $\mu\text{m/hr}$ . **E)** Frequency for each zone of the relative position between two cells. In the frame of reference of one cell, we estimated the probability of having another cell,  $x_j$ , nearby. **F)** Pair-wise correlation with nearby neighbors. Depending on the relative position  $\mathbf{x}_i - \mathbf{x}_j$ , we estimate the correlation between the velocity directions  $\boldsymbol{\omega}_i$  and  $\boldsymbol{\omega}_j$ . Axes indicate cell position and distance in  $\mu\text{m}$  of the neighboring cells. Dotted yellow line show the average size of the centered cell.

**Fig. S18**

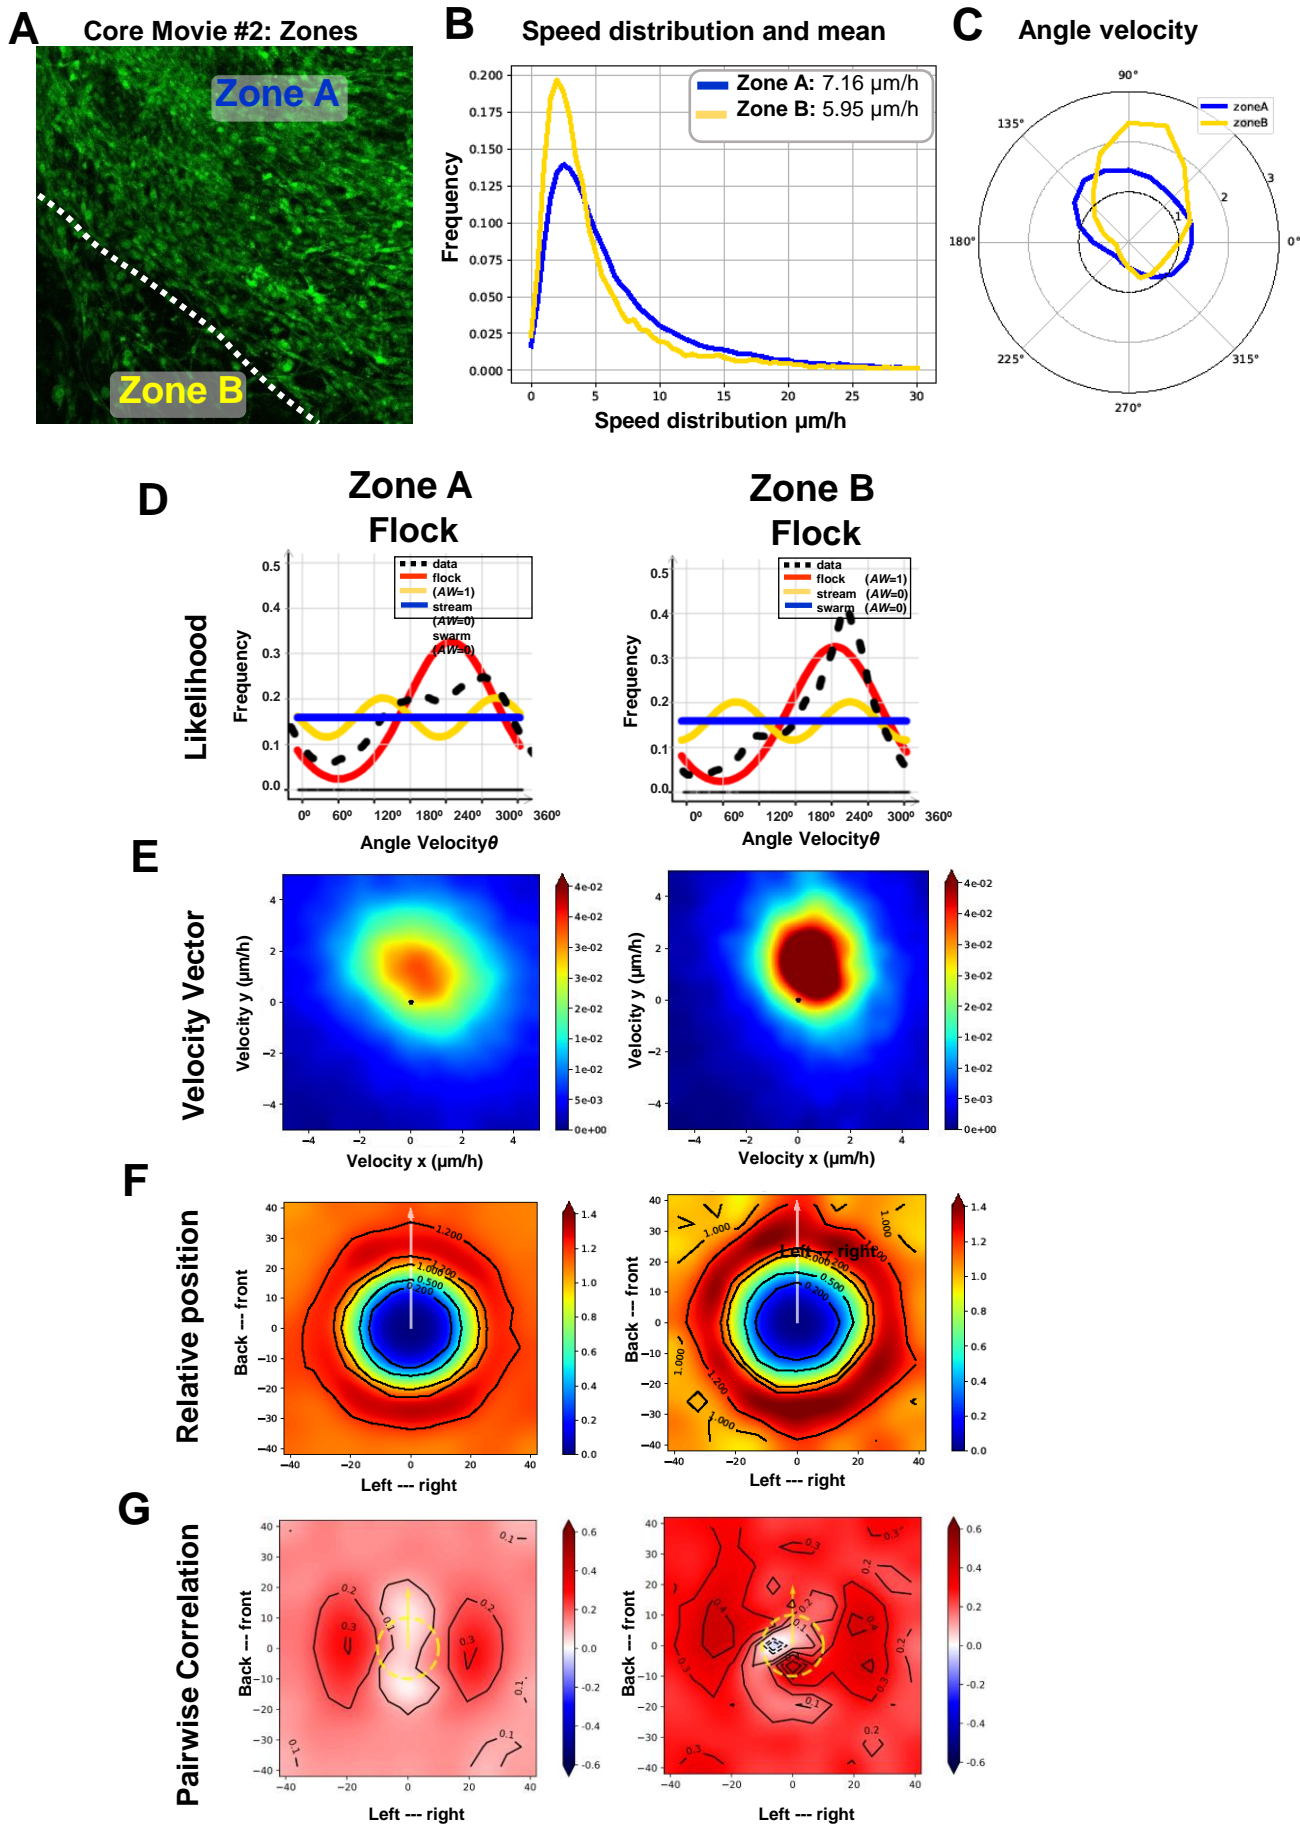

**Fig. S18: Collective dynamic patterns observed by confocal imaging within the glioma tumor core: analysis of core movie #2.** **A)** Statistical analysis of different regions of the movie, Zone A and Zone B, illustrated on a representative time-lapse confocal still image (green(GFP+):tumor cells). **B)** Speed distribution ( $\mu\text{m}/\text{h}$ ) in Zone A (blue) and B (yellow). Inner panel shows mean speed for each zone. **C)** Angle Velocity distribution analysis ( $\theta$ ) performed by zones. **D)** Likelihood analysis histograms to classify dynamic pattern formation. Zone A: flock, Zone B: flock. AW: Akaike Weight. AW=0 or AW=1. **E)** Heat map of the distribution of velocity vectors in each zone. **F)** Histogram plot showing relative position with nearby neighbors within each zone. X and Y axes are in  $\mu\text{m}$ . Scale bar shows frequency represented in colors. **G)** Histograms of pair-wise correlation with nearby neighbors for each zone. X and Y axes are in  $\mu\text{m}$ . Scale bar shows correlation represented as colors.

Fig. S19

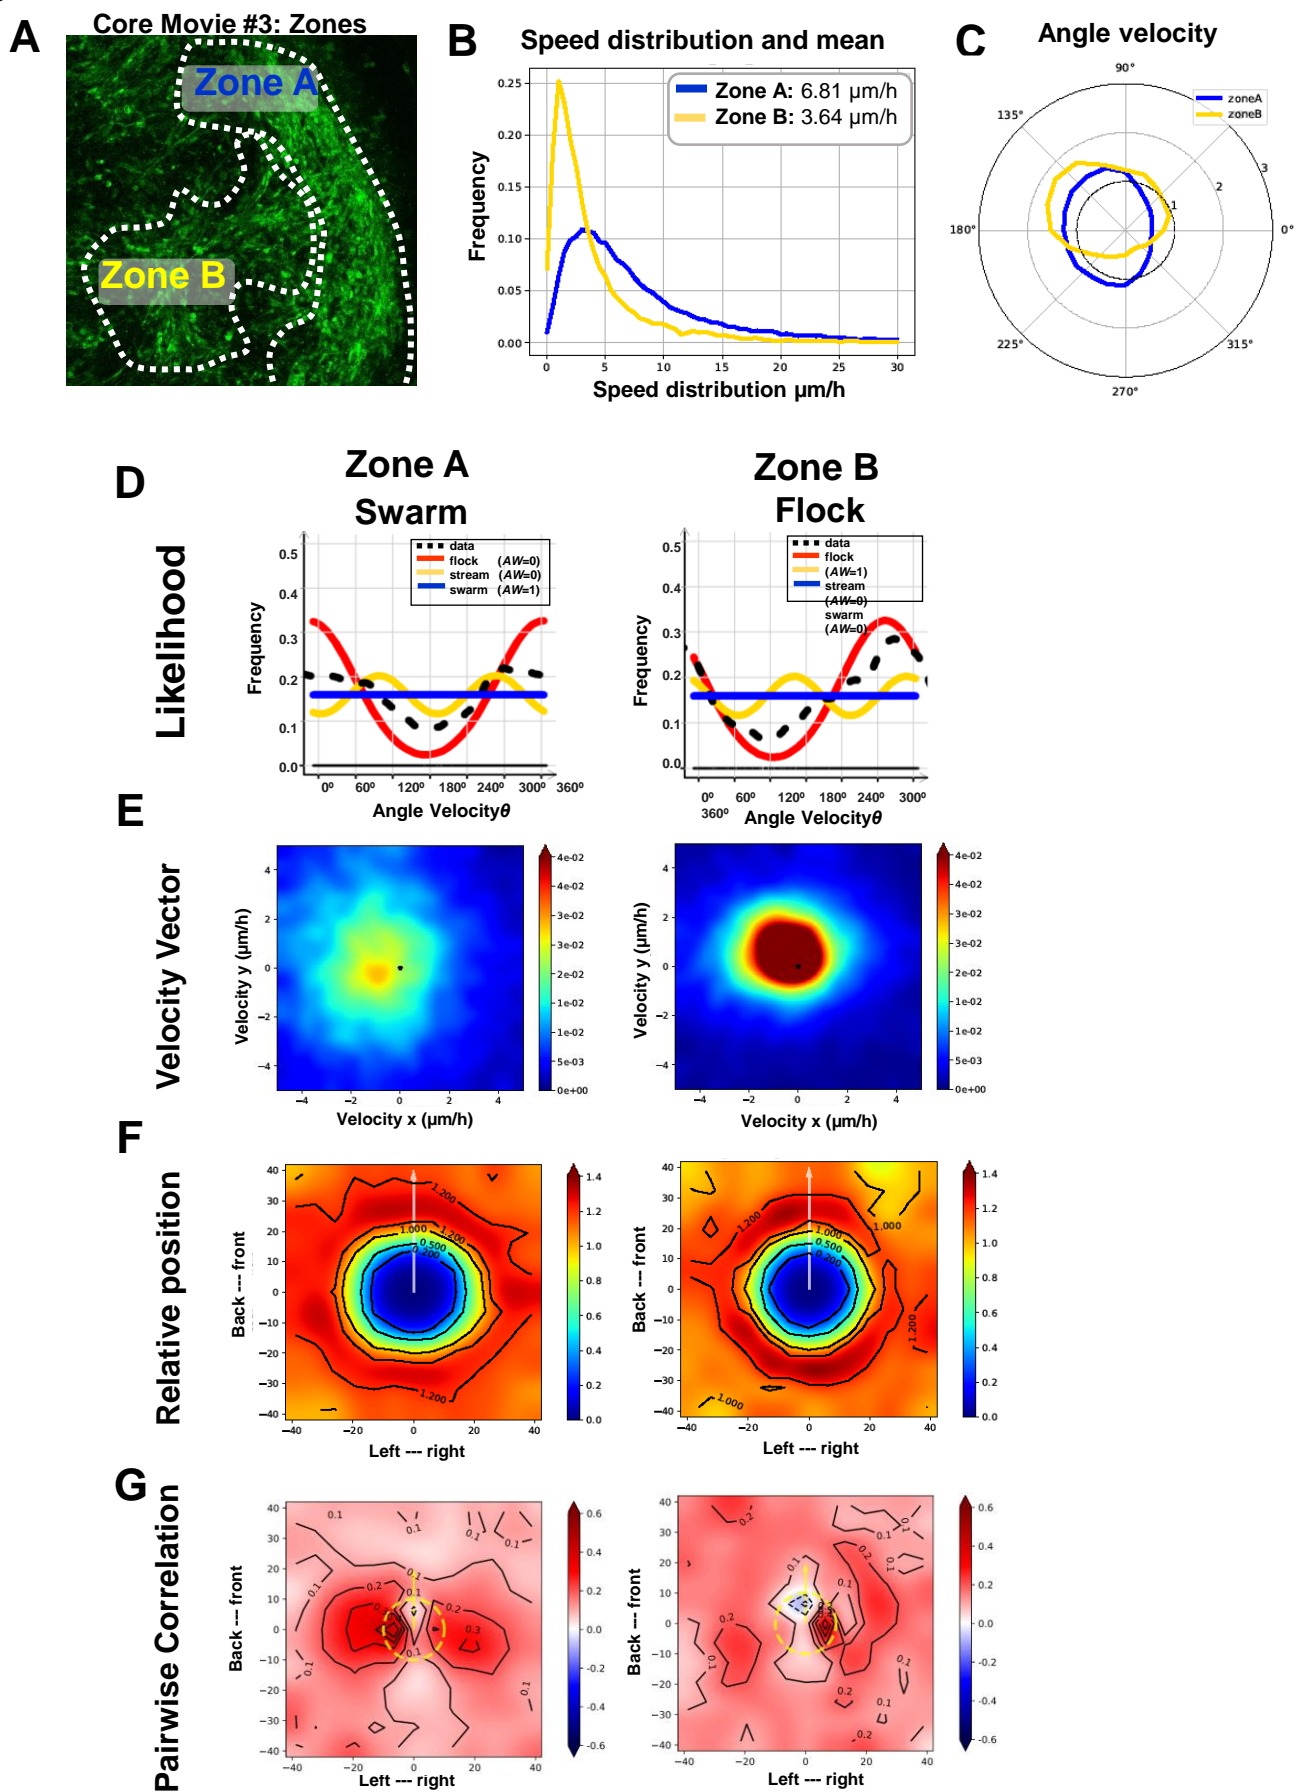

**Fig. S19: Collective dynamic patterns observed by confocal imaging within the glioma tumor core: analysis of core movie #3.** **A)** Statistical analysis of different regions of the movie, Zone A and Zone B, illustrated on a representative time-lapse confocal still image (green(GFP+):tumor cells). **B)** Speed distribution ( $\mu\text{m/hr}$ ) in Zone A (blue) and B (yellow). Inner panel shows mean of the speed for each zone. **C)** Angle Velocity distribution analysis ( $\theta$ ) performed by zones. **D)** Likelihood analysis histograms to classify dynamic pattern formation. Zone A: flock, Zone B: flock. AW: 0 or AW:1. **E)** Heat map plot of the distribution of the velocity vector in each zone. **F)** Histogram plot showing interposition with nearby neighbor for each zone. X and Y axes are in  $\mu\text{m}$ . Scale bar shows frequency represented in colors. **G)** Histograms of pair-wise correlation with nearby neighbors for each zone. X and Y axes are in  $\mu\text{m}$ . Scale bar shows correlation represented in colors.

**Fig. S20**

**A** Core Movie #4: Zones

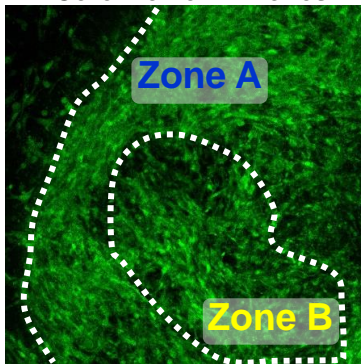

**B** Speed distribution and mean

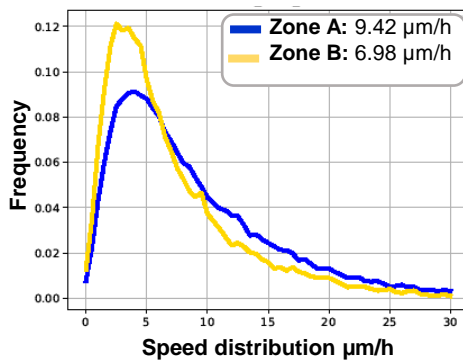

**C** Angle velocity

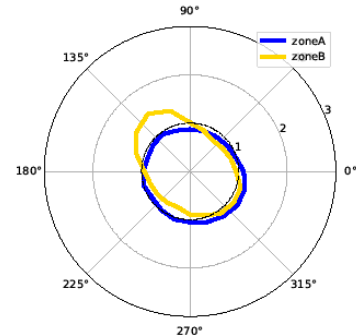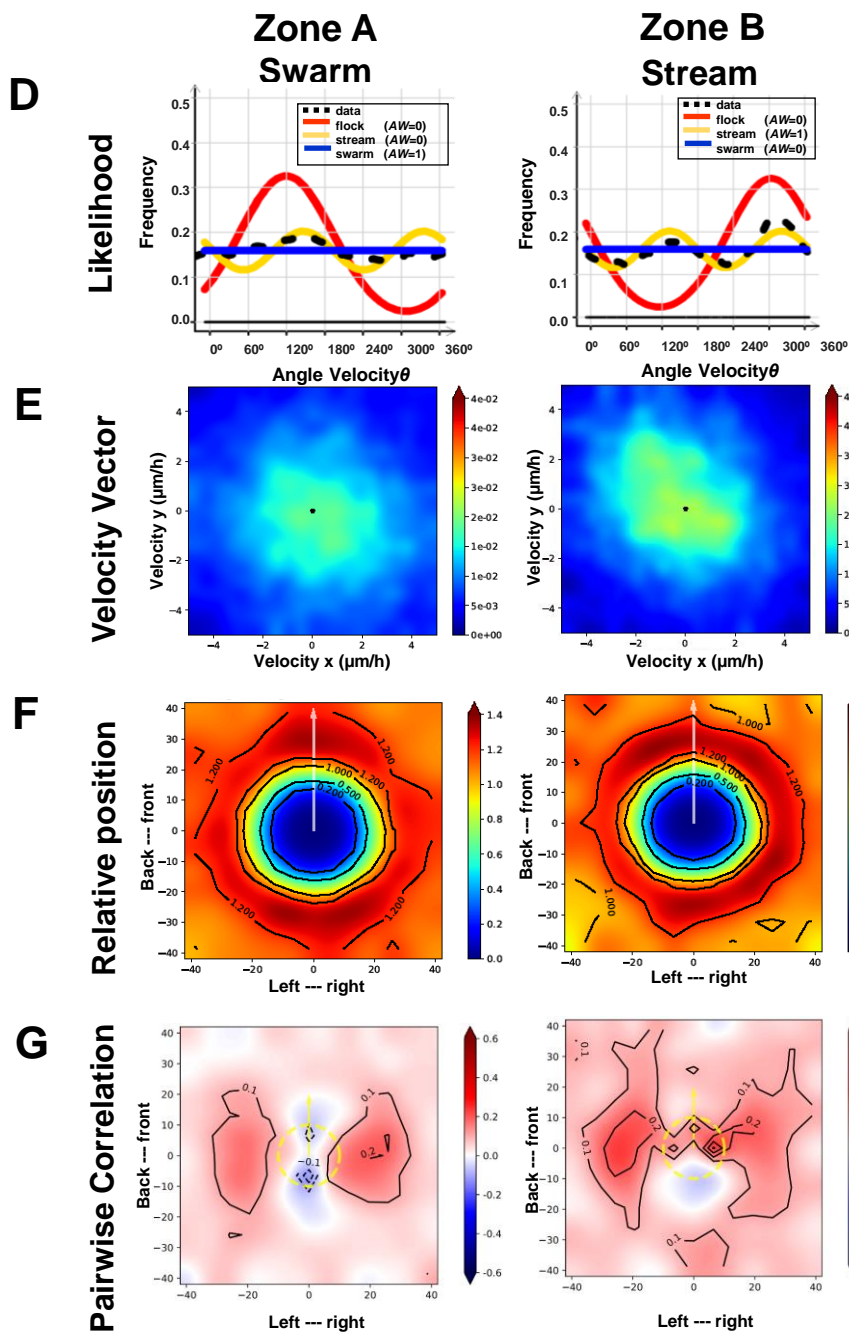



**Fig. S20: Collective dynamic patterns observed by confocal imaging within the glioma tumor core: analysis of core movie #4.** **A)** Statistical analysis of different regions of the movie, Zone A and Zone B, illustrated on a representative time-lapse confocal still image (green(GFP+):tumor cells). **B)** Speed distribution ( $\mu\text{m/hr}$ ) in Zone A (blue) and B (yellow). Inner panel shows mean of the speed for each zone. **C)** Angle Velocity distribution analysis ( $\theta$ ) performed by zones. **D)** Likelihood analysis histograms to classify dynamic pattern formation. Zone A: swarm, Zone B: Stream. AW:0 or AW:1. **E)** Heat map plot of the distribution of the velocity vector in each zone. **F)** Histogram plot showing interposition with nearby neighbor for each zone. X and Y axes are in  $\mu\text{m}$ . Scale bar shows frequency represented in colors. **G)** Histograms of pair-wise correlation with nearby neighbors for each zone. X and Y axes are in  $\mu\text{m}$ . Scale bar shows correlation represented in colors.

Fig. S21

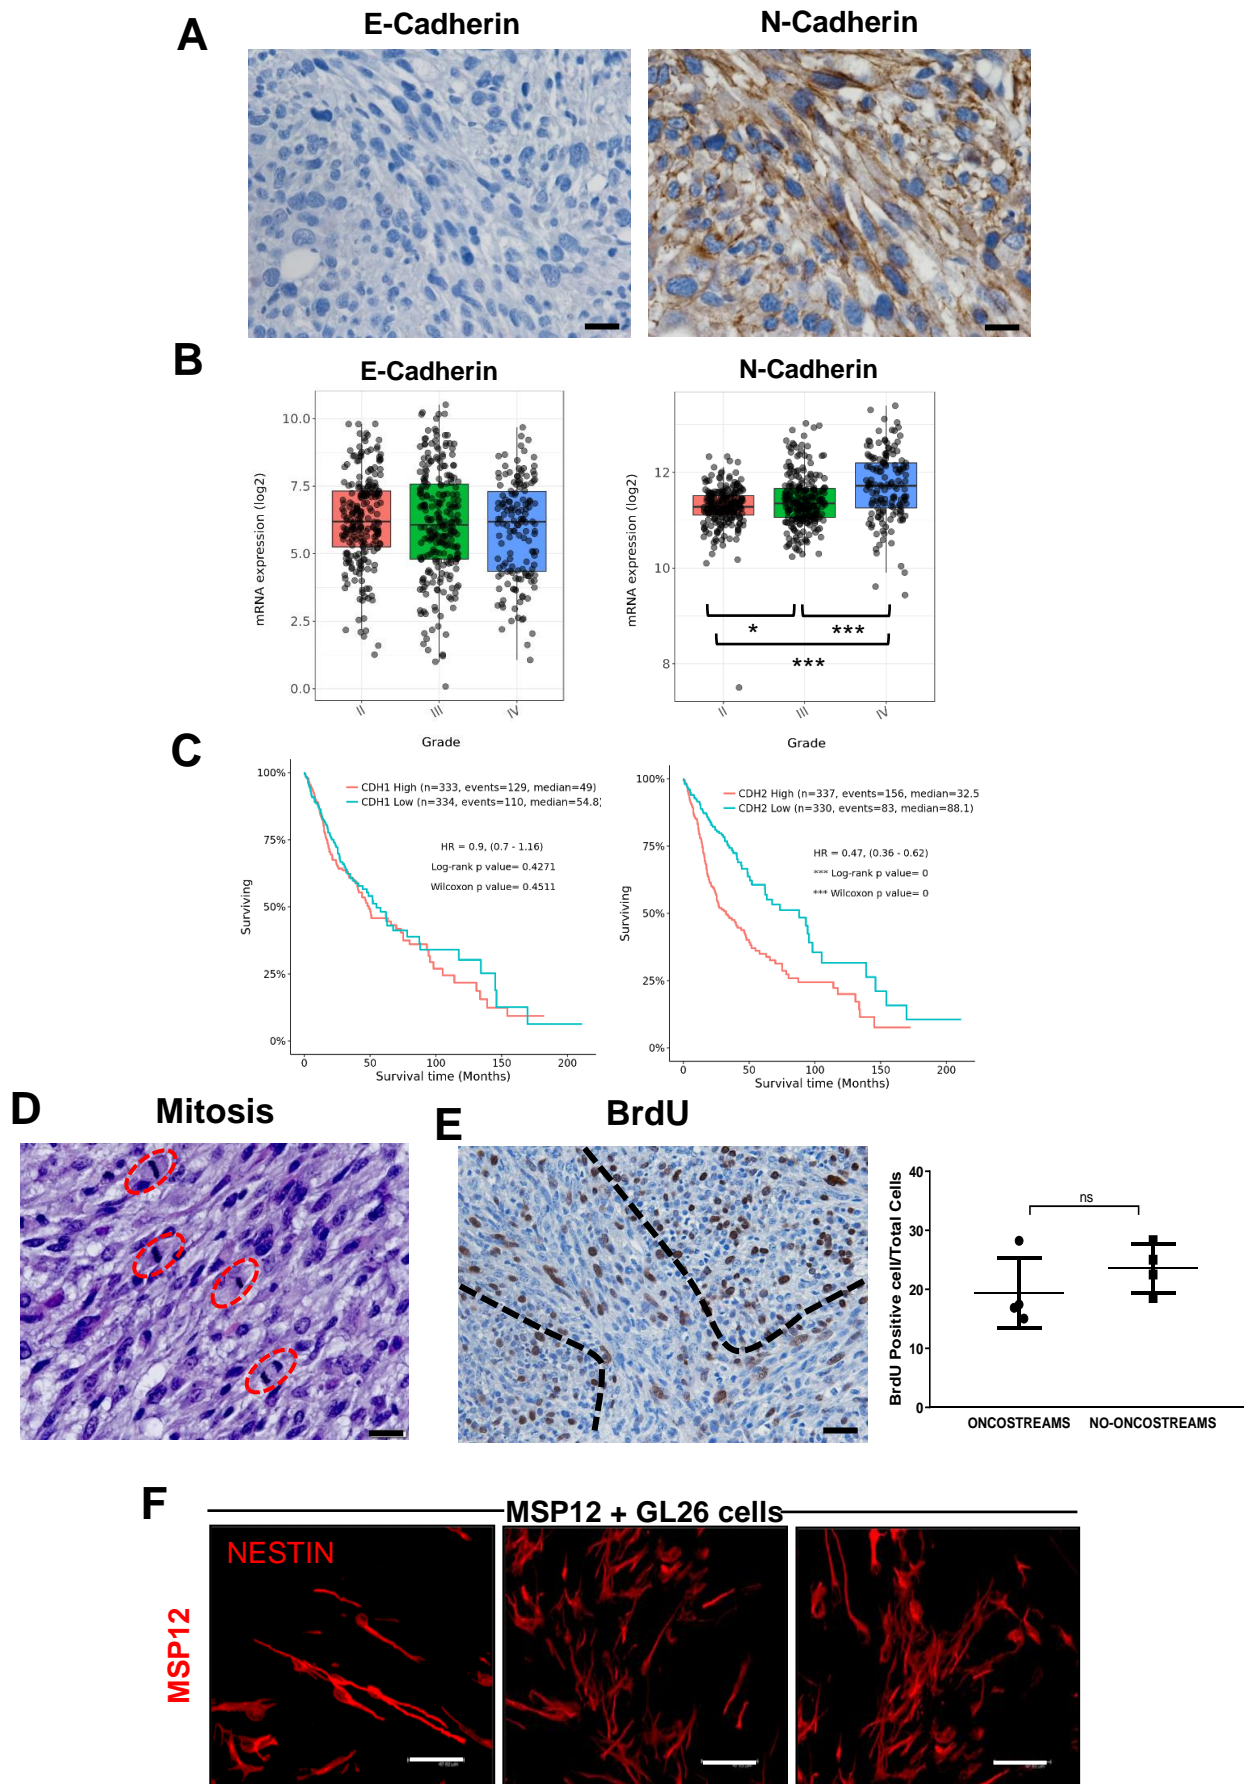

**Fig. S21: Characterization of Oncostream' s cellular functions.** **A)** Immunohistochemistry analysis of E-cadherin and N-cadherin expression within NPA gliomas. Gliomas are negative for E-cadherin and positive for N-cadherin both within and outside oncostream structures. **B)** mRNA expression analysis of N-cadherin and E-cadherin comparing glioma tumors of different grade using the TCGA-GBMLGG database. Graph shows the  $\log_2$  mRNA expression levels. Centre line of the boxplot is the median, upper bound of the boxplot is the Q3 (75th percentile), the lower bound of the boxplot is the Q1(25th percentile), the upper whiskers is the maximum value of the data (within 1.5 times the interquartile range over the 75th percentile), and the lower whisker is the minimum value of the data (within 1.5 times the interquartile range under the 25th percentile). Statistical significance of the data set was calculated using One-way ANOVA test and multiple comparison Tukey test, \* $p=0.031$ , \*\*\*\* $p<0.0001$ . (Grade II:  $n=226$ , Grade III:  $n=244$ , Grade IV:  $n=150$ ). **C)** Kaplan-Meier survival curves of glioma patients comparing N-cadherin and E-cadherin high (red) vs low (blue) expression in glioma tumors (TCGA-GBMLGG database). All these data was analyzed from the Gliovis website (<http://gliovis.bioinfo.cnio.es>). **D)** Analysis of glioma cell mitosis within oncostreams in Hematoxylin and Eosin (H&E) stained sections. Mitosis is orientated in the same orientation of oncostreams. Red lines indicate mitosis. Experiment was performed in 5 independent tumor sections. **E)** Proliferation analysis comparing oncostream (dotted lines) with no-oncostream areas. Positive BrDu cells were counted by Image-J software. Scale bars: 50  $\mu\text{m}$ . BrDu positive cells per total cells in the visual field were counted;  $n=4$ . Ten fields of each section were selected at random. Error bars represent  $\pm$  SEM; paired two-sided t-test. **F)** Immunofluorescence images of human-nestin (red) highlighting MSP12 cells. MSP-12 cells were implanted with GL26-citrine cells. MSP12 cells adopt a bipolar structure only when aligned to GL26-citrine cells. Scale bar: 47.62  $\mu\text{m}$ . This image complement Fig. 7K. Experiment was performed in 3 independent tumor samples as indicated in Fig. 7K.



**Fig. S22**

**Collective invasion patterns**

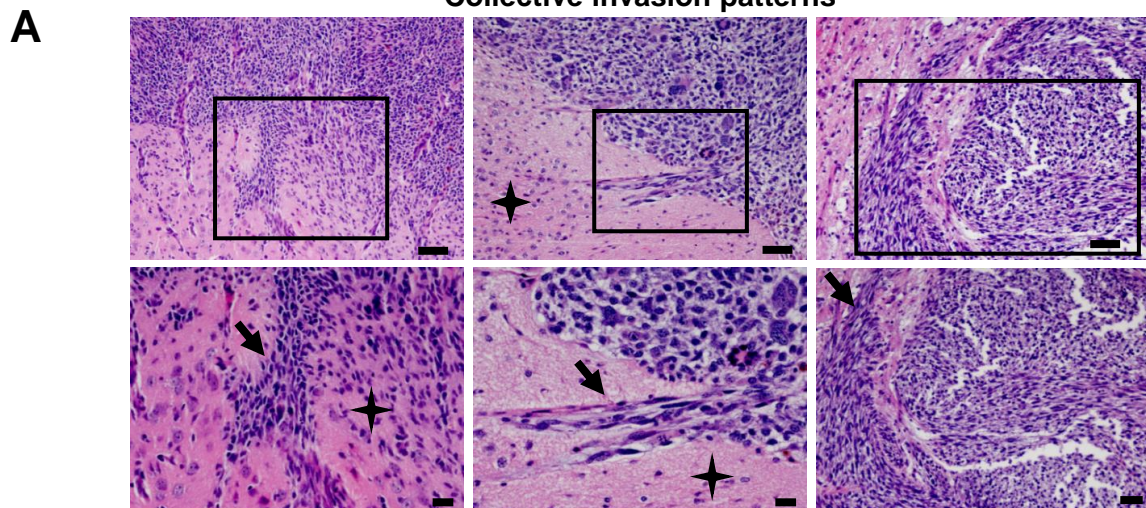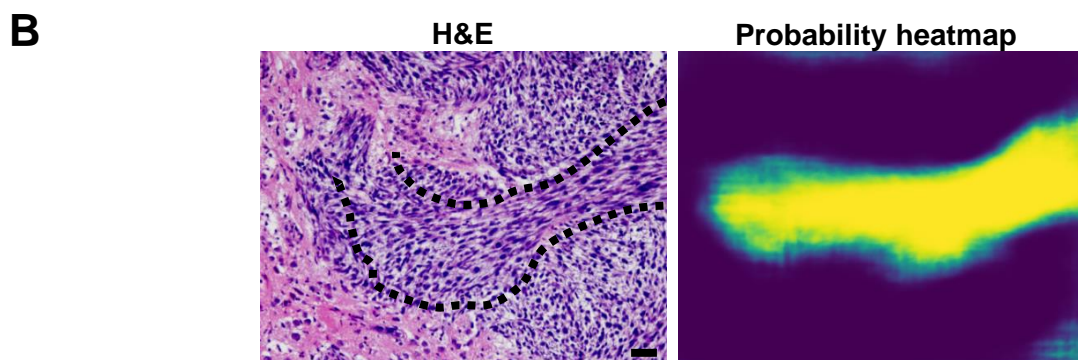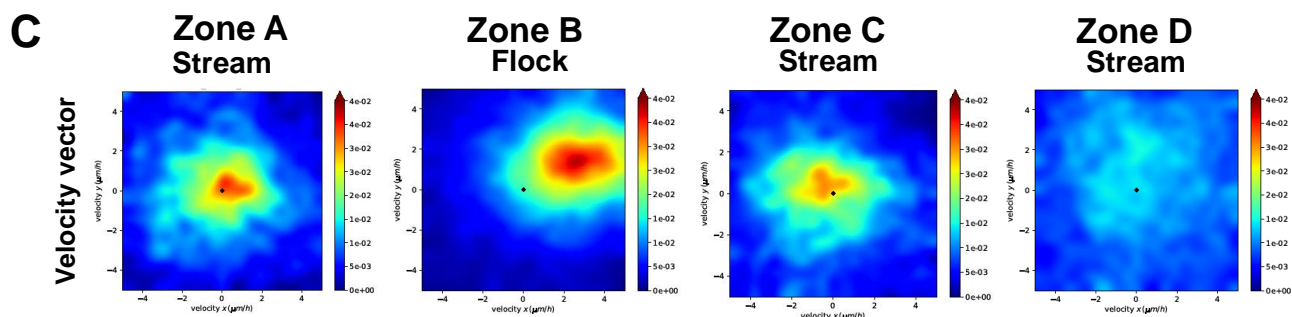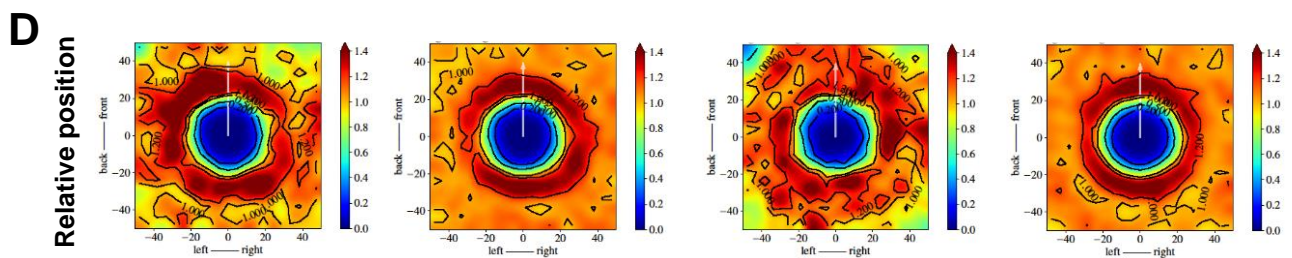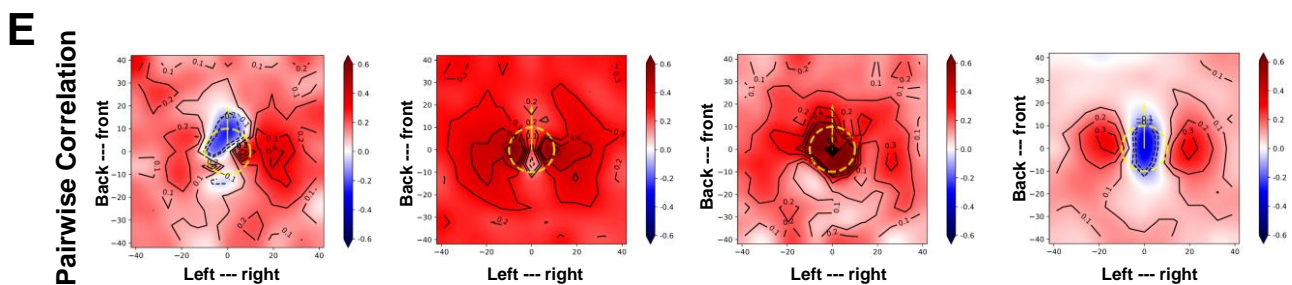

**Fig. S22: Invasion analysis using confocal time-lapse imaging on the tumor border: Movie #5. A)** Representative images of oncostream invasion (top row, black boxes) from Hematoxylin and Eosin (H&E) stained sections of GEMM of glioma. Arrows indicate oncostream collective invasion. Areas highlighted by black boxes are shown at higher magnification in the lower row. Stars indicate sites of single cell invasion. Experiment was performed in six independent tumor sections. Scale bars: 50  $\mu\text{m}$  (top) and 20  $\mu\text{m}$  (bottom). **B)** Representative images of oncostream invasion (dotted line indicates an oncostream at the tumor border) on H&E stained sections of NPA gliomas (left), and its detection by deep learning analysis (right). Experiment was performed in three independent tumor sections. Scale bar=20  $\mu\text{m}$ . **C)** Heatmap plot of the distribution of velocity vectors in zones A, B, C and D of border movie #5 (shown in **Fig. 5**). **D)** Histogram of relative cell positions in relation to nearby neighbors. For each cell,  $x_i$ , we estimate the probability to find another cell,  $x_j$ , nearby. Probability scale bars are represented by colors. Axes shows cells position left-to-right and front-to-back in  $\mu\text{m}$ . **E)** Pairwise correlation of motion with nearby neighbors. Scale bars of probability are represented by colors. Axes indicate cell position and distance in  $\mu\text{m}$  from neighboring cells. Dotted yellow line indicates the location of  $x_i$ .

**Fig. S23**

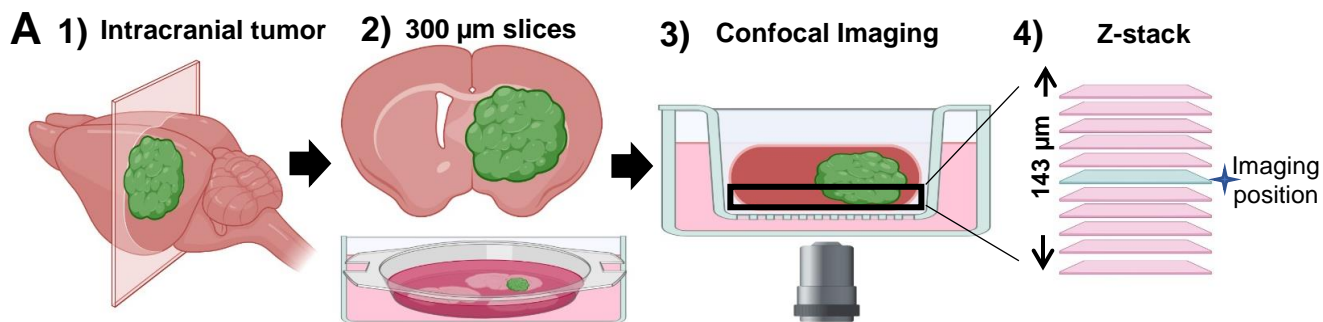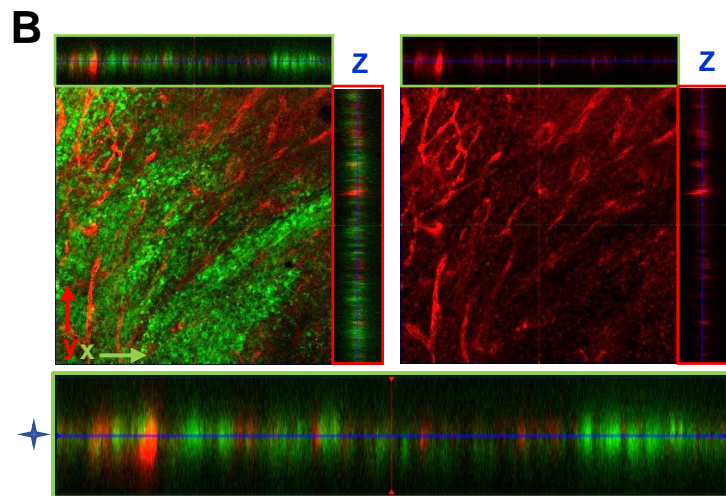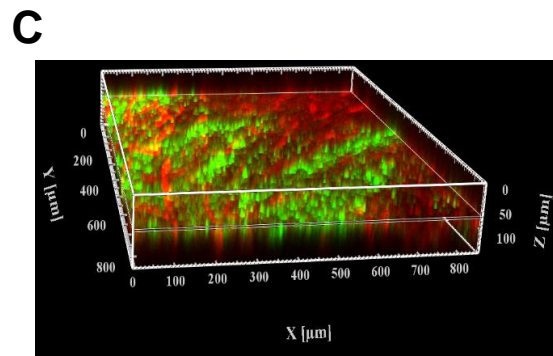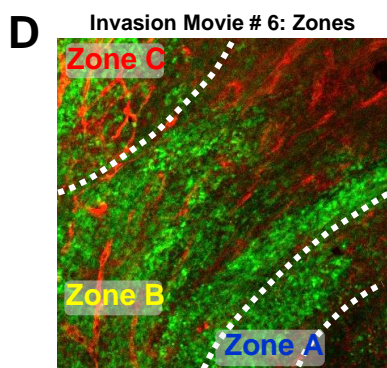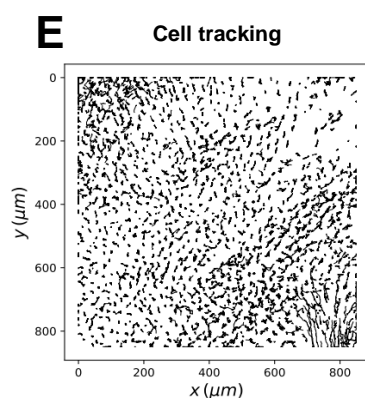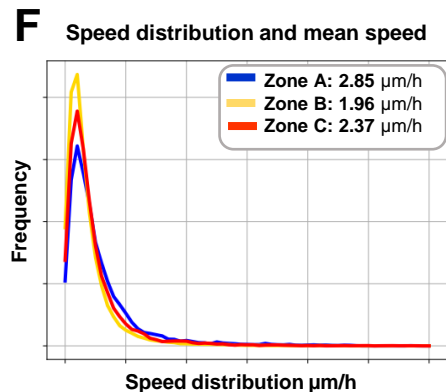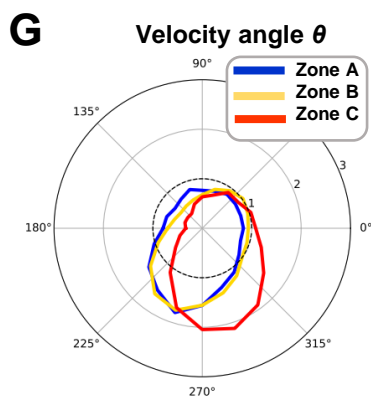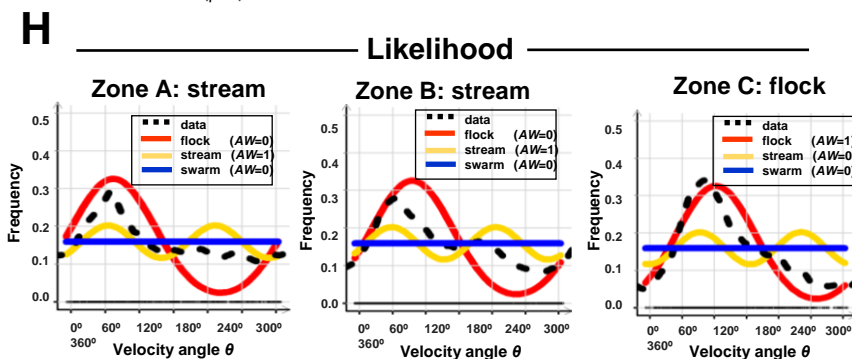



Invasion Movie # 6: Zones

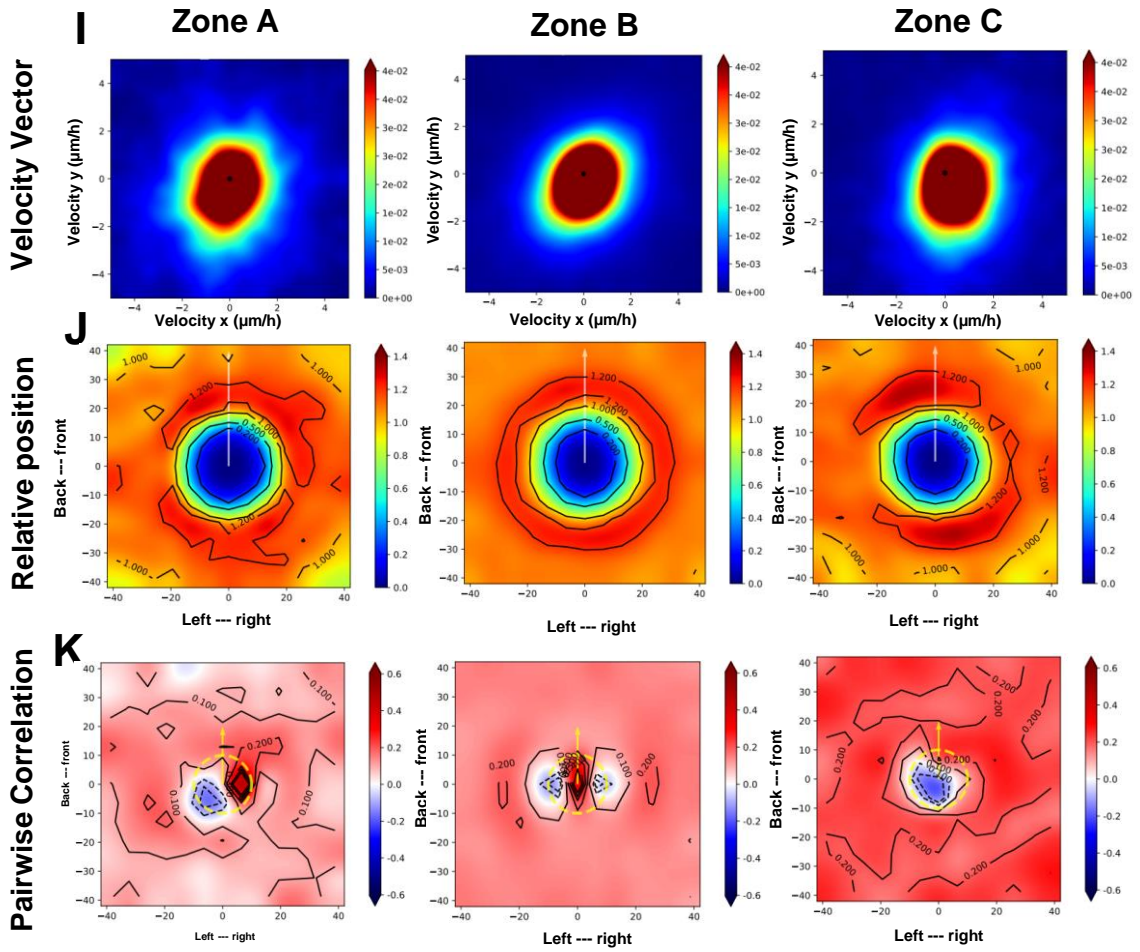

## Fig. S23. Brain tumor explant model setup and invasion analysis using time lapse-confocal imaging: Movie #6

**A)** Schematic representation of the experimental setup and site of imaging. 1) NPA-GFP+ cells were intracranially implanted, and brains from tdTomato mice bearing GFP+ tumors were isolated 19 days post-tumor implantation. 2) These brains were sliced into 300  $\mu\text{m}$  thick coronal sections and transferred to a laminin-coated cell culture Insert. 3) Cell culture insets containing brain tumor slices were placed in the incubator chamber of an inverted Zeiss LSM880 laser scanning confocal microscope at 37 °C with a 5% CO<sub>2</sub> atmosphere. The black rectangle represents the imaging area that extends from the bottom to  $\sim 143 \mu\text{m}$ ; not being able to image further into the brain slice. 4) A high-resolution z-stack was obtained (dimensions of  $x=850.19$ ,  $y=850.19$ ,  $z=143.81$ ). The location for time-lapse imaging was selected to fall at the middle of the z-stack ( $\sim 70 \mu\text{m}$ ) to avoid imaging at the bottom of the explant. Red fluorescent protein: normal brain parenchyma. Green fluorescent protein: tumor cells. (Created with BioRender.com) **B)** Orthogonal projections from z-stacks revealed the cross-sectional aspects of the tumor volume and the position of time-lapse confocal imaging of Movie #6, an NPA glioma. Green rectangles (on top) show the profile of the x-z plane. Red rectangles (on the right) show the profile of the y-z plane. The left image illustrates tumor cells (in green) and brain parenchyma (in red); the right image shows only the brain parenchyma. The larger green rectangle at the bottom of **(Fig. S23B)** illustrates the orthogonal z-stack projection of the x-z plane (from 0 to 143  $\mu\text{m}$ ) and the exact plane of imaging, in the middle of z plane (indicated by a star and a blue line). **C)** A high-resolution 3D z-stack spanning up to 143  $\mu\text{m}$  depth (starting at the bottom of the brain slice) was acquired on a confocal microscope, imported into the Imaris viewer, and used to reconstruct this 3D image. 30 x-y frames from the brain's surface were taken at a depth increment of 4.96  $\mu\text{m}$  at a resolution of 1024x1024 pixels. XYZ axes of the 3D image are shown in white (850x850x143  $\mu\text{m}$ ), and the yellow line shows the exact imaging plane for time-lapse data acquisition *in vivo* (at  $\sim 70 \mu\text{m}$  depth). Red fluorescent protein: normal brain parenchyma. Green fluorescent protein: tumor cells. **D)** Representative time-lapse scanning confocal image of an NPA glioma growing at the tumor border, and showing Zones A, B, C. **E)** Tracking analysis of individual cell paths using the TrackMate plugin from Image-J. **F)** Histogram of speed distribution and mean speed ( $\mu\text{m}/\text{h}$ ) of Zones A, B and C. **G)** Angle Velocity distribution analysis ( $\theta$ ) performed by zones. The plot shows the overall direction and magnitude of cell movement. **H)** Likelihood analysis of the dynamic patterns at the tumor border. The frequency distribution  $\rho$  flock (red),  $\rho$  stream (yellow) and  $\rho$  swarm (blue) are shown. The estimation of the black line (data) uses a *non-parametric* estimation. AW: 0 or AW:1. **I)** Heat map plot of the distribution of the velocity vectors in each zone. **J)** Histogram plot showing the relative position with nearby neighbors for each zone; x and y axes are in  $\mu\text{m}$ . Bars to the right of each figure indicate probability values in color. **K)** Histograms of pairwise correlations with nearby neighbors for each zone; x and y axes are in  $\mu\text{m}$ . Bars to the right of each figure indicate correlation values in colors.

Fig. S24

**A** Invasion Movie #7: Zones

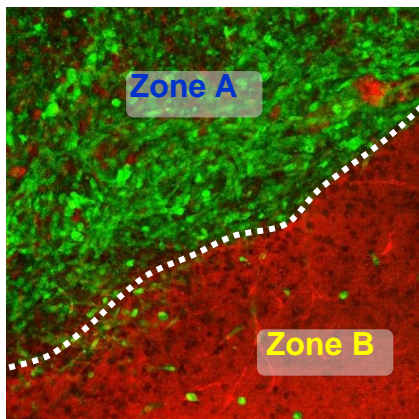

**B** Speed Distribution and mean speed

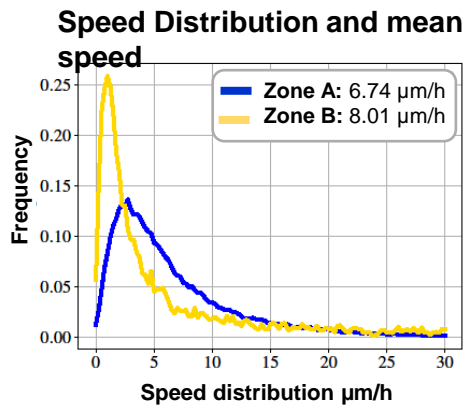

**C** Angle velocity

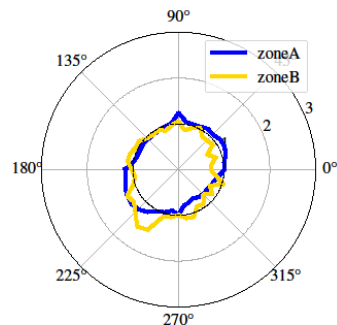

**D**

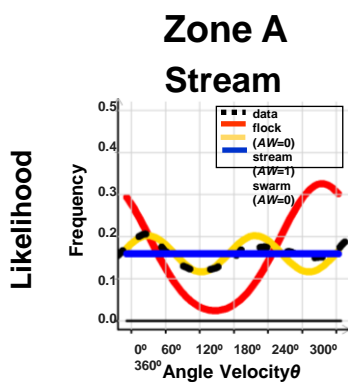

**Zone B Swarm**

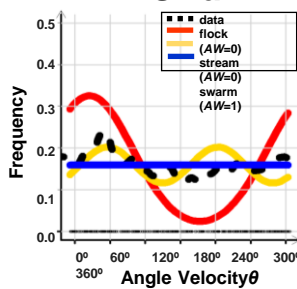

**E**

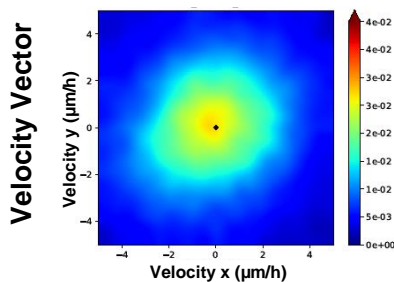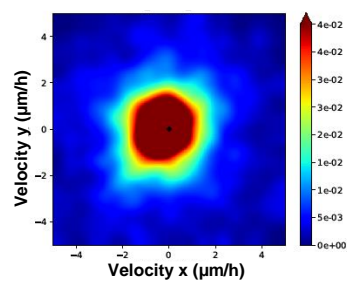

**F**

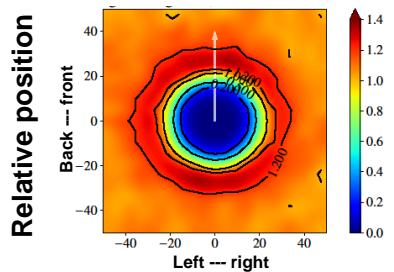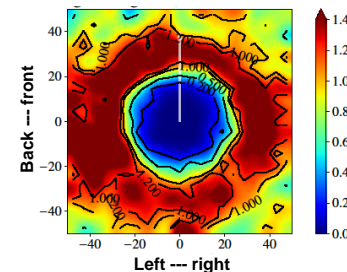

**G**

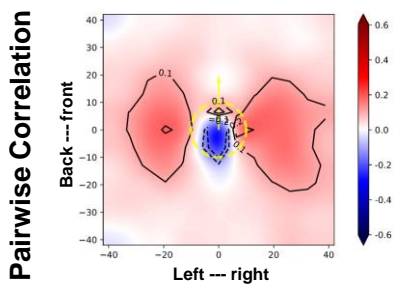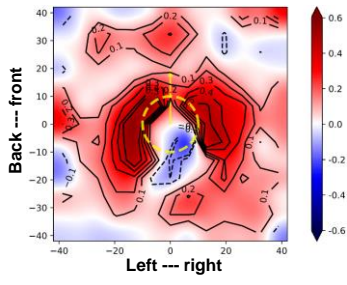

**Fig. S24: Invasion analysis using confocal time-lapse imaging on the tumor border: Movie #7)** **A)** Labeling of different regions of the tumor border for movie #6. Representative time-lapse confocal images subdivided into dynamic Zones A and B. The image shows tumor cells (green) and brain parenchyma (red). **B)** Speed distribution ( $\mu\text{m}/\text{h}$ ) in Zone A (blue) and B (yellow). Inner panel shows mean speed for each zone. **C)** Angle Velocity distribution analysis ( $\theta$ ) performed by zones. **D)** Likelihood analysis histograms classify dynamic motion patterns. Zone A: stream, Zone B: swarm. AW:0 or AW:1. **E)** Heat map plot of the distribution of the velocity vectors in each zone. **F)** Histogram plot showing the relative position with nearby neighbors for each zone.  $x$  and  $y$  axes are in  $\mu\text{m}$ . Bars to the right of each figure indicate probability values in color. **G)** Histograms of pairwise correlations with nearby neighbors for each zone.  $x$  and  $y$  axes are in  $\mu\text{m}$ . Bars to the right of each figure indicate correlation values in colors.

Fig. S25

**A** Invasion Movie #8: Zones

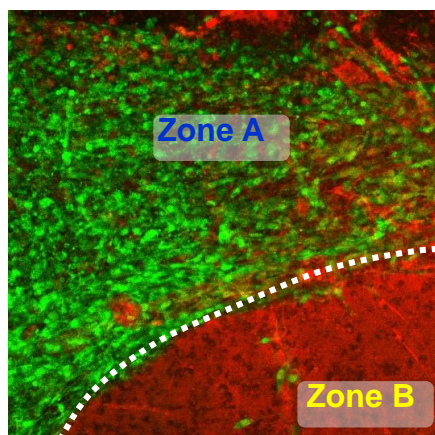

**B** Speed Distribution and mean speed

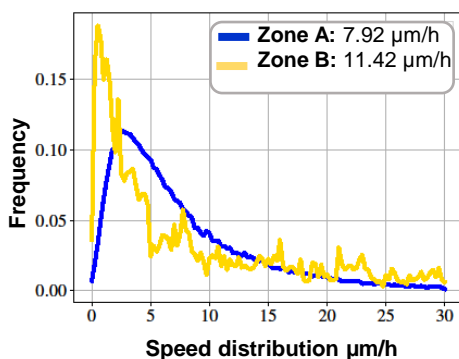

**C** Angle velocity

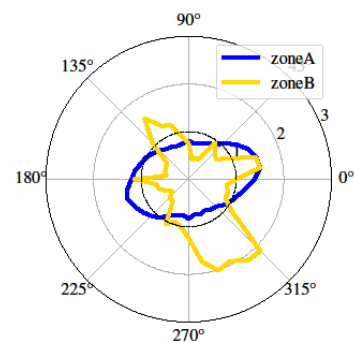

**D**

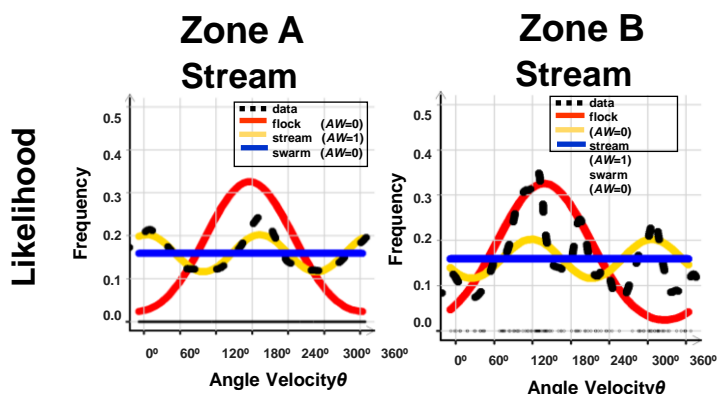

**E**

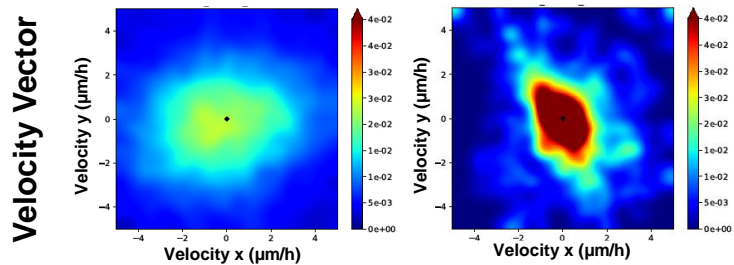

**F**

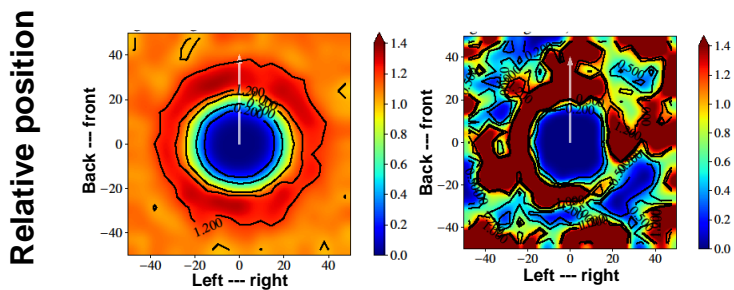

**G**

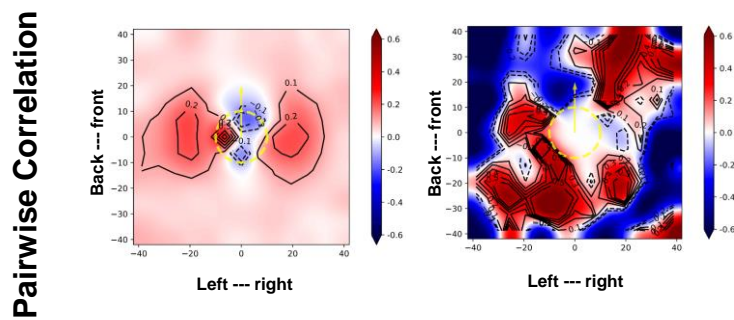

**Fig. S25: Invasion analysis using confocal time-lapse imaging of the tumor border: Movie #8. A)** Labeling of different regions of the tumor border for movie #7. Representative time-lapse confocal images subdivided into dynamic Zones A and B. The image shows tumor cells (green) and brain parenchyma (red). **B)** Speed distribution ( $\mu\text{m}/\text{h}$ ) in Zone A (blue) and B (yellow). Inner panel shows mean speed for each zone. **C)** Angle Velocity distribution analysis ( $\theta$ ) performed by zones. **D)** Likelihood analysis histograms classify dynamic motion patterns. Zone A: stream, Zone B: stream. Akaike Weight; AW:0 or AW:1. **E)** Heat map plot of the distribution of the velocity vectors in each zone. **F)** Histogram plot showing the relative position with nearby neighbors for each zone. x and y axes are in  $\mu\text{m}$ . Bars to the right of each figure indicate probability values in color. **G)** Histograms of pairwise correlations with nearby neighbors for each zone. x and y axes are in  $\mu\text{m}$ . Bars to the right of each figure indicate correlation values in colors.



Fig. S26

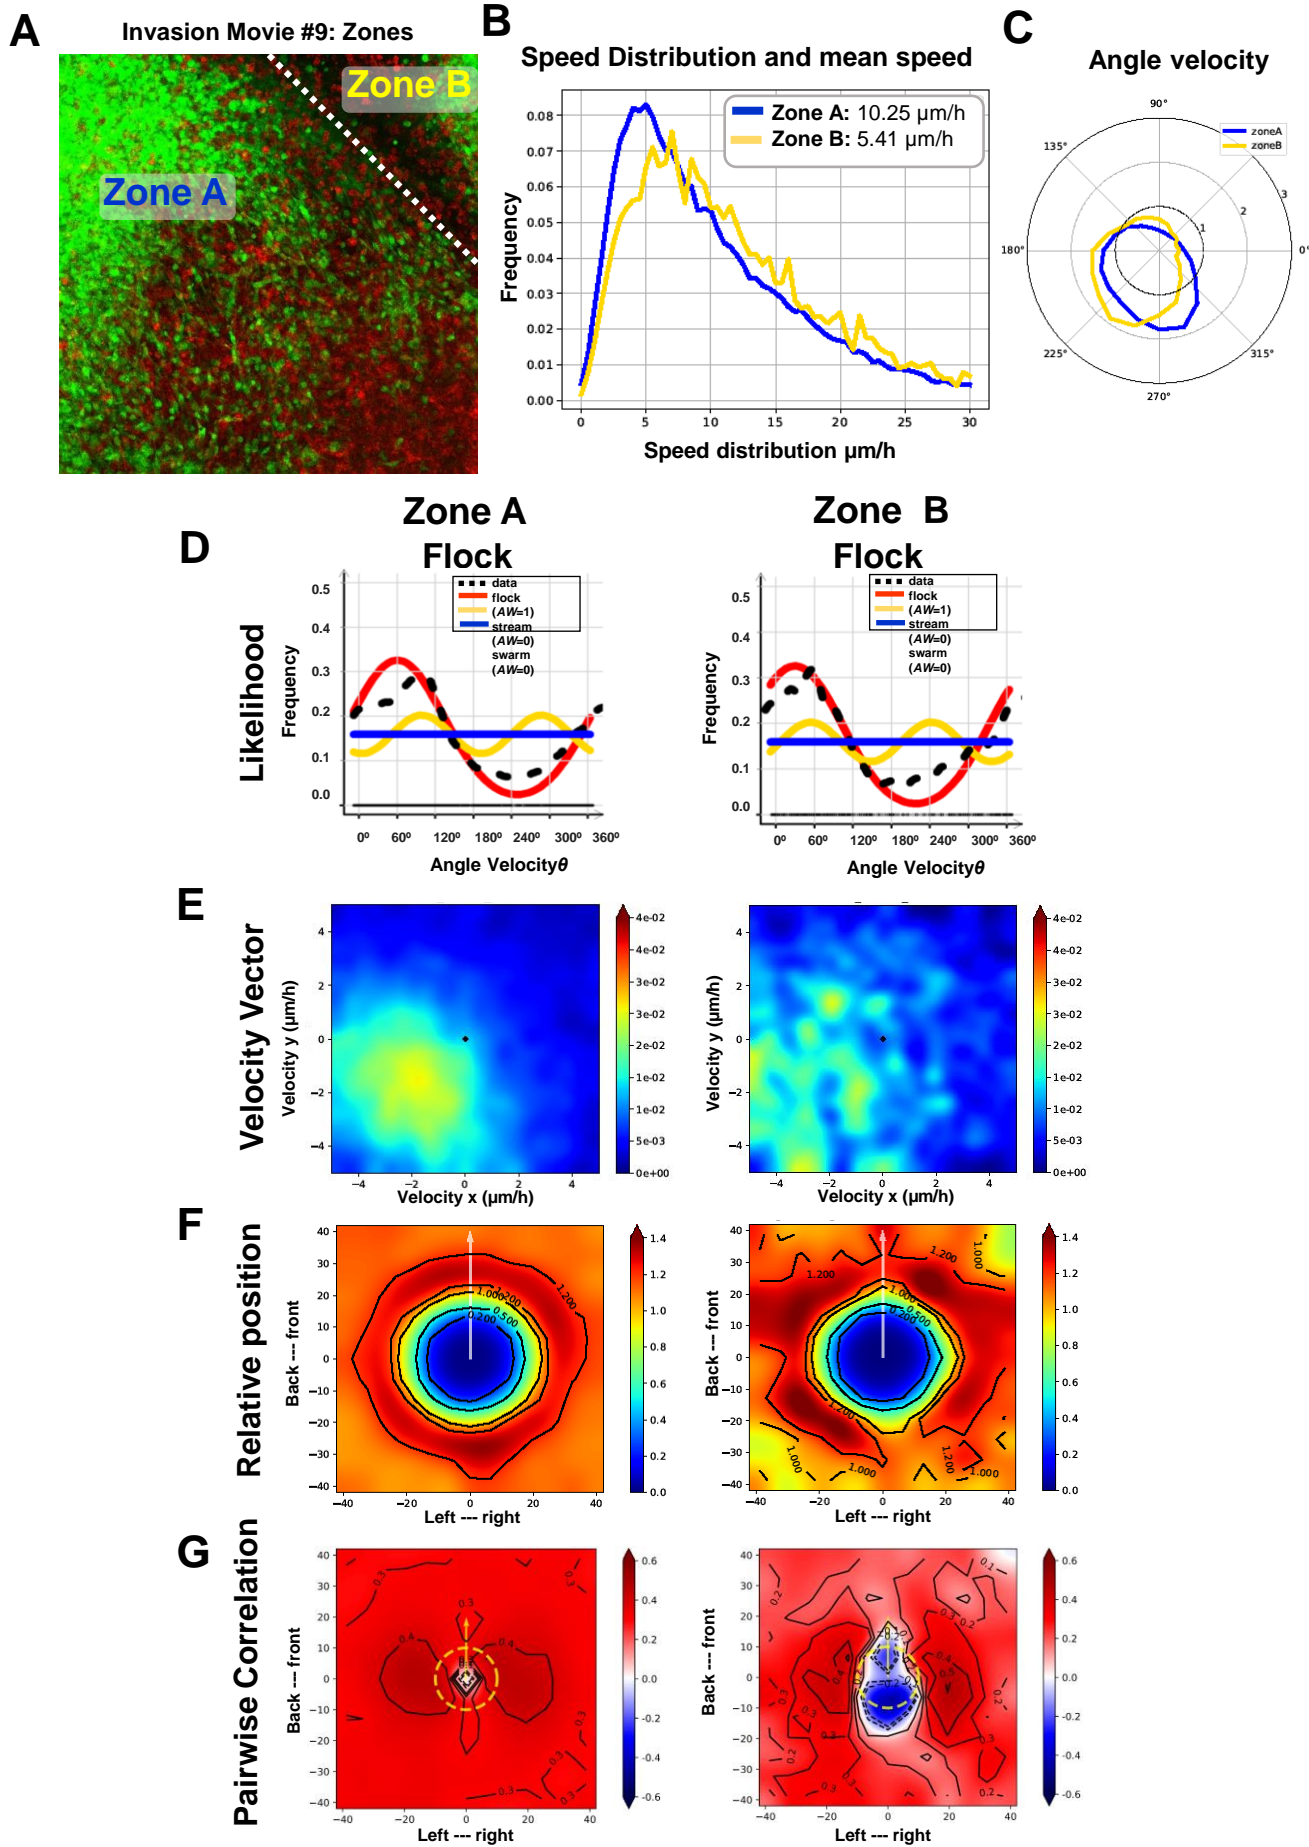

**Fig. S26: Invasion analysis using confocal time-lapse imaging on the tumor border: Movie #9. A)** Labeling of different regions of the tumor border for movie #8. Representative time-lapse confocal images subdivided into dynamic Zones A and B. The image shows tumor cells (green) and brain parenchyma (red). **B)** Speed distribution ( $\mu\text{m}/\text{h}$ ) in Zone A (blue) and B (yellow). Inner panel shows mean speed for each zone. **C)** Angle Velocity distribution analysis ( $\theta$ ) performed by zones. **D)** Likelihood analysis histograms to classify dynamic motion patterns. Zone A: flock, Zone B: flock. AW: 0 or AW:1. **E)** Heat map plot of the distribution of the velocity vectors in each zone. **F)** Histogram plot showing the relative position with nearby neighbors for each zone.  $x$  and  $y$  axes are in  $\mu\text{m}$ . Bars to the right of each figure indicate probability values in color. **G)** Histograms of pairwise correlations with nearby neighbors for each zone.  $x$  and  $y$  axes are in  $\mu\text{m}$ . Bars to the right of each figure indicate correlation values in colors.

**Fig. S27**

**Invasion**

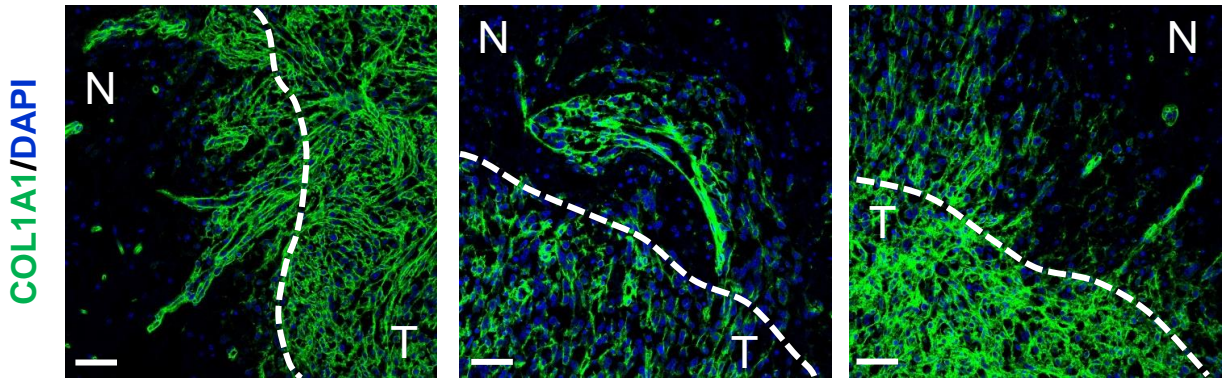

**Fig. S27. Role of COL1A1 fibers in oncostreams invasion of the normal brain.** Representative images of immunofluorescence analysis of COL1A1 expression in a genetically engineered mouse glioma, NPA (IDH1-WT). Images show aligned fibers of collagen1A1 along multicellular fascicles of glioma cells invading the normal brain. We propose that Collagen fibers function as scaffolds for collective tumoral cell migration. COL1A1 expression in green (Alexa 488) and nuclei in blue (DAPI). Images (20x, 1240 x 1240 pixels). White dotted line indicates tumor core border. Experiment was performed in three independent tumor sections. Scale bar: 50  $\mu$ m. T=Tumor. N=normal tissue.

**Fig. S28**

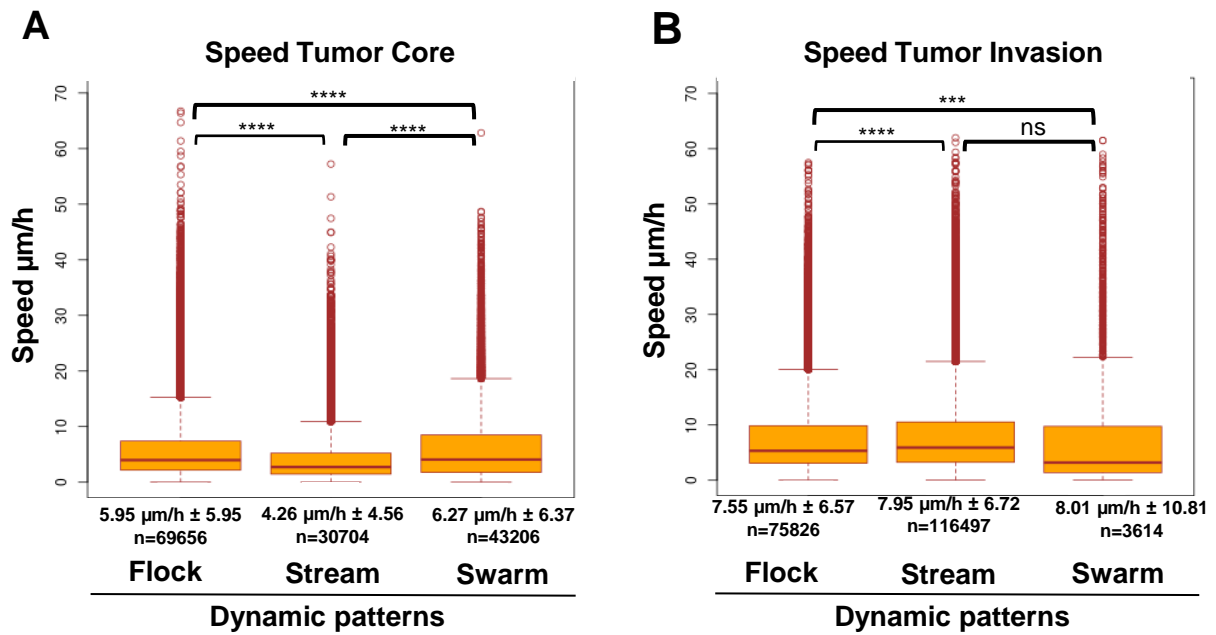

**Fig. S28: Speed analysis of cells in either flocks, streams, or swarms within the tumor core or the tumor border. A)** Box plots of cell speed ( $\mu\text{m/hr}$ ) within flocks, streams, or swarms in the tumor core. Stream n=30704, Flock n= 69656, Swarm n=43206. Mean  $\pm$ SEM are shown; One-way ANOVA, \*\*\*\*p<2.2e-16. **B)** Box plot of speed of cells ( $\mu\text{m/hr}$ ) within flocks, streams, or swarms within the tumor border. Stream n=116497, Flock n=75826, Swarm n=3614. Mean  $\pm$ SEM are shown; One-way ANOVA, flock versus swarm '\*\*\*\*' p=0.001753, stream versus swarm 'ns' p=0.7132

**Fig. S29**

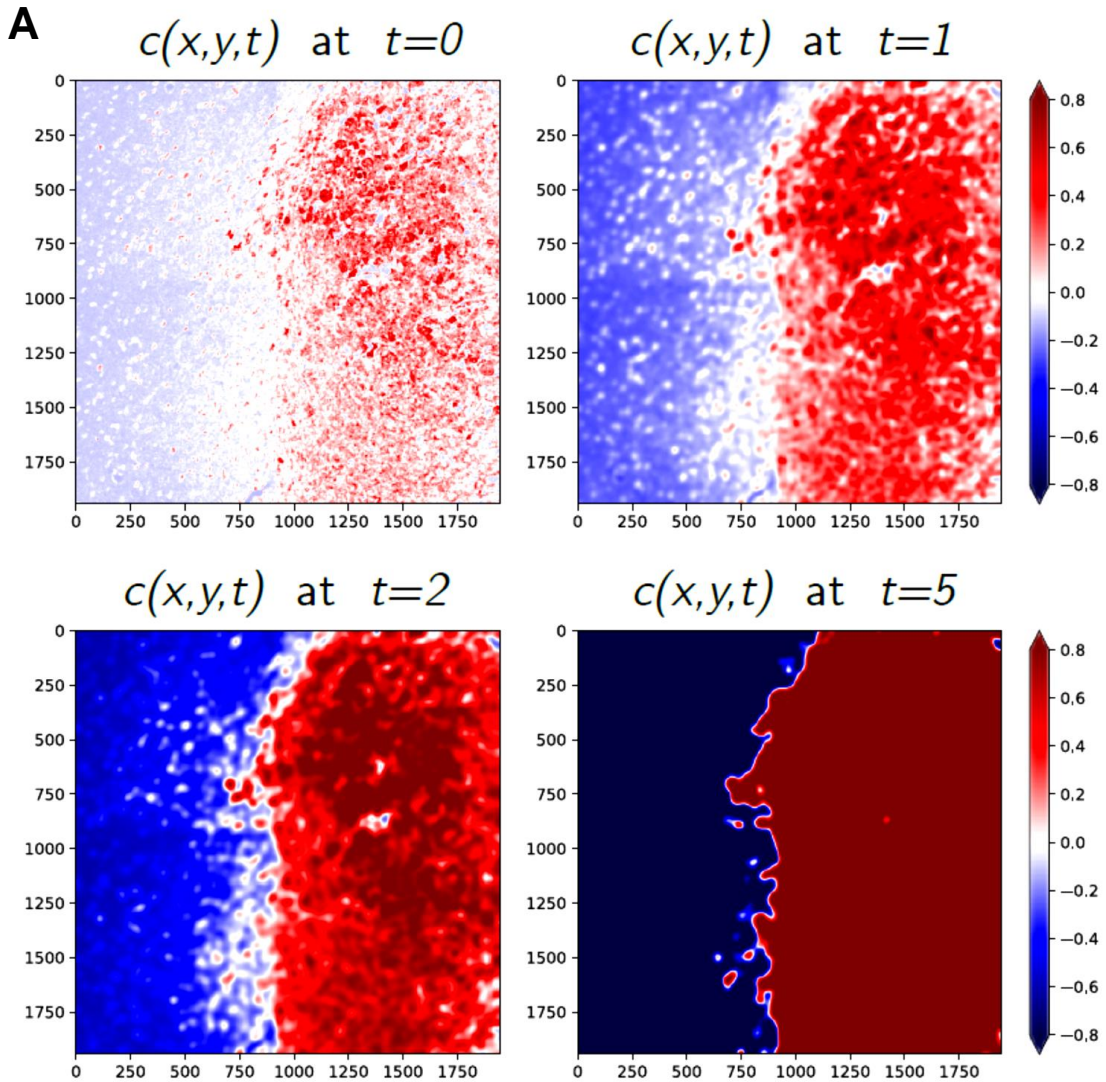

**Fig. S29: Analysis of the tumor borders. A)** Two-phase segmentation of an image using Allen-Cahn equation (3.1) described in Supplementary material and Methods. Each pixel has to converge to either +1 or -1 depending on its neighboring pixels. As a result, the image becomes segregated into two regions representing the inside and the outside of the tumor.



**Fig. S30**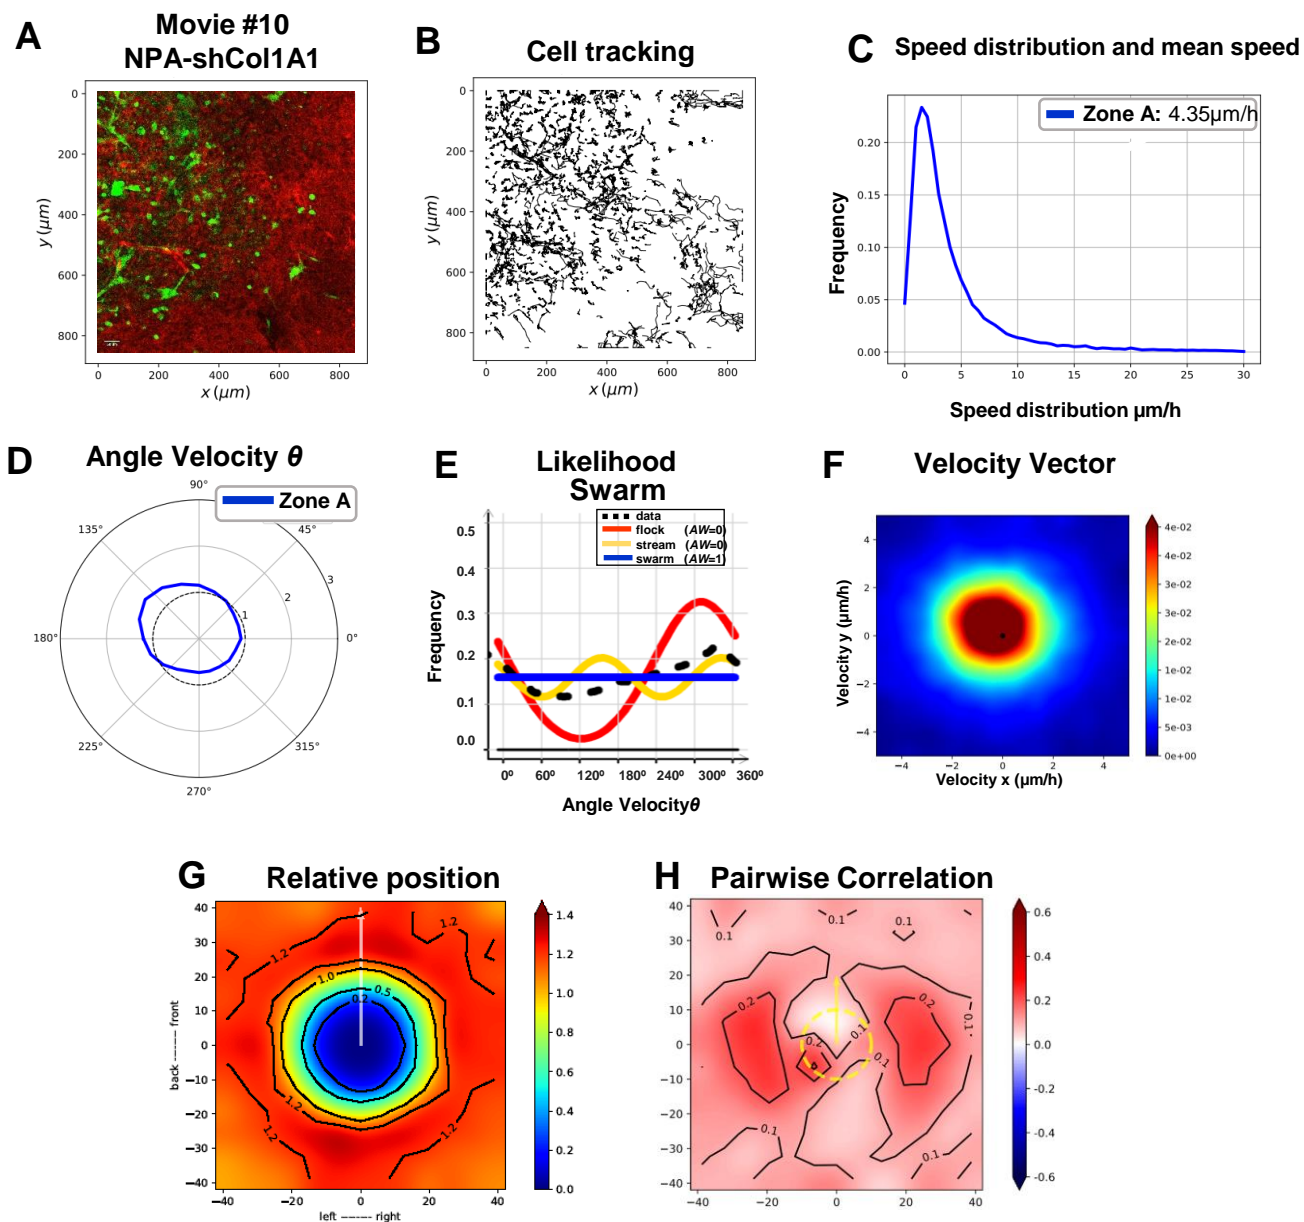

**Fig. S30: Migration analysis of an NPashCol1A1 explant model using confocal time-lapse imaging; Movie # 10.** **A)** Representative time-lapse confocal images of the tumor border for movie #10. The image shows tumor cells (green) and brain parenchyma (red). **B)** Tracking analysis of individual cell paths performed using the Track-Mate plugin from Image-J. **C)** Speed distribution and mean speed ( $\mu\text{m}/\text{h}$ ). **D)** Angle Velocity distribution analysis ( $\theta$ ) performed. **E)** Likelihood analysis histogram to classify the dynamic motion pattern as a swarm. **F)** Heat map plot of the distribution of the velocity vectors. **G)** Histogram plot showing the relative position with nearby neighbors.  $x$  and  $y$  axes are in  $\mu\text{m}$ . Bars to the right of each figure indicate probability values in color. **H)** Histograms of pairwise correlations with nearby neighbors.  $x$  and  $y$  axes are in  $\mu\text{m}$ . Bars to the right of each figure indicate correlation values in colors.



**Fig. S31**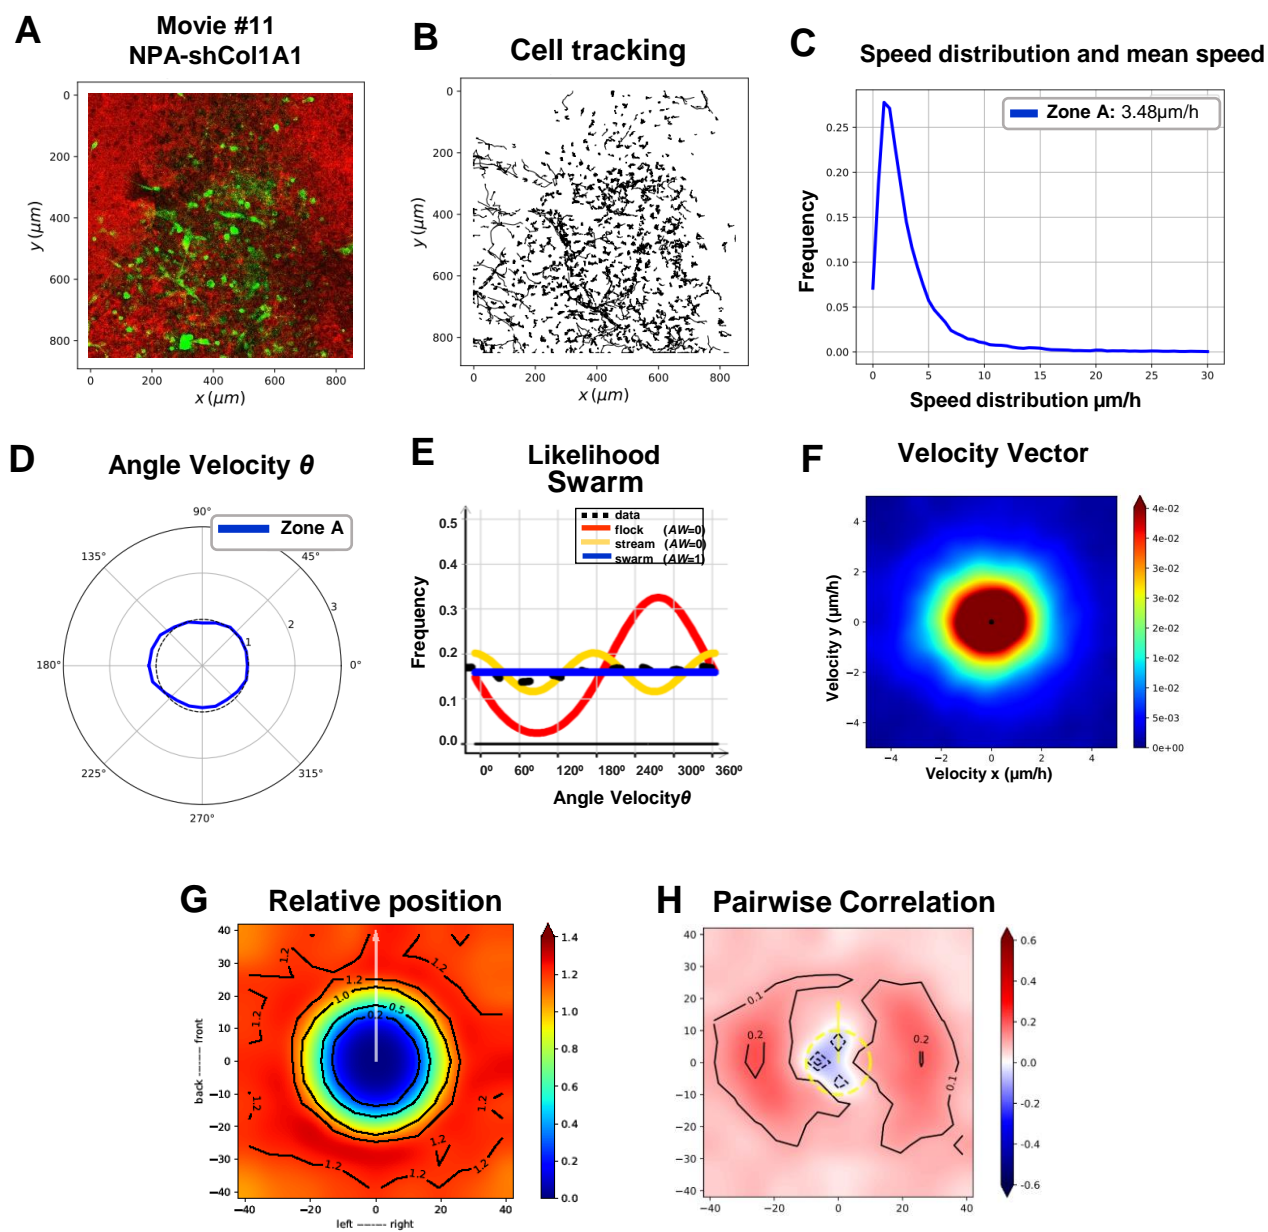

**Fig. S31: Migration analysis of an NPAsCol1A1 explant model using confocal time-lapse imaging; Movie # 11. A)** Representative time-lapse confocal images of the tumor border for movie #11. The image shows tumor cells (green) and brain parenchyma (red). **B)** Tracking analysis of individual cell paths performed using the Track-Mate plugin from Image-J. **C)** Speed distribution and mean speed ( $\mu\text{m}/\text{h}$ ). **D)** Angle Velocity distribution analysis ( $\theta$ ) performed. **E)** Likelihood analysis histogram to classify the dynamic motion pattern as a swarm. **F)** Heat map plot of the distribution of the velocity vectors. **G)** Histogram plot showing the relative position with nearby neighbors.  $x$  and  $y$  axes are in  $\mu\text{m}$ . Bars to the right of each figure indicate probability values in color. **H)** Histograms of pairwise correlations with nearby neighbors,  $x$  and  $y$  axes are in  $\mu\text{m}$ . Bars to the right of each figure indicate correlation values in colors.

**Fig. S32**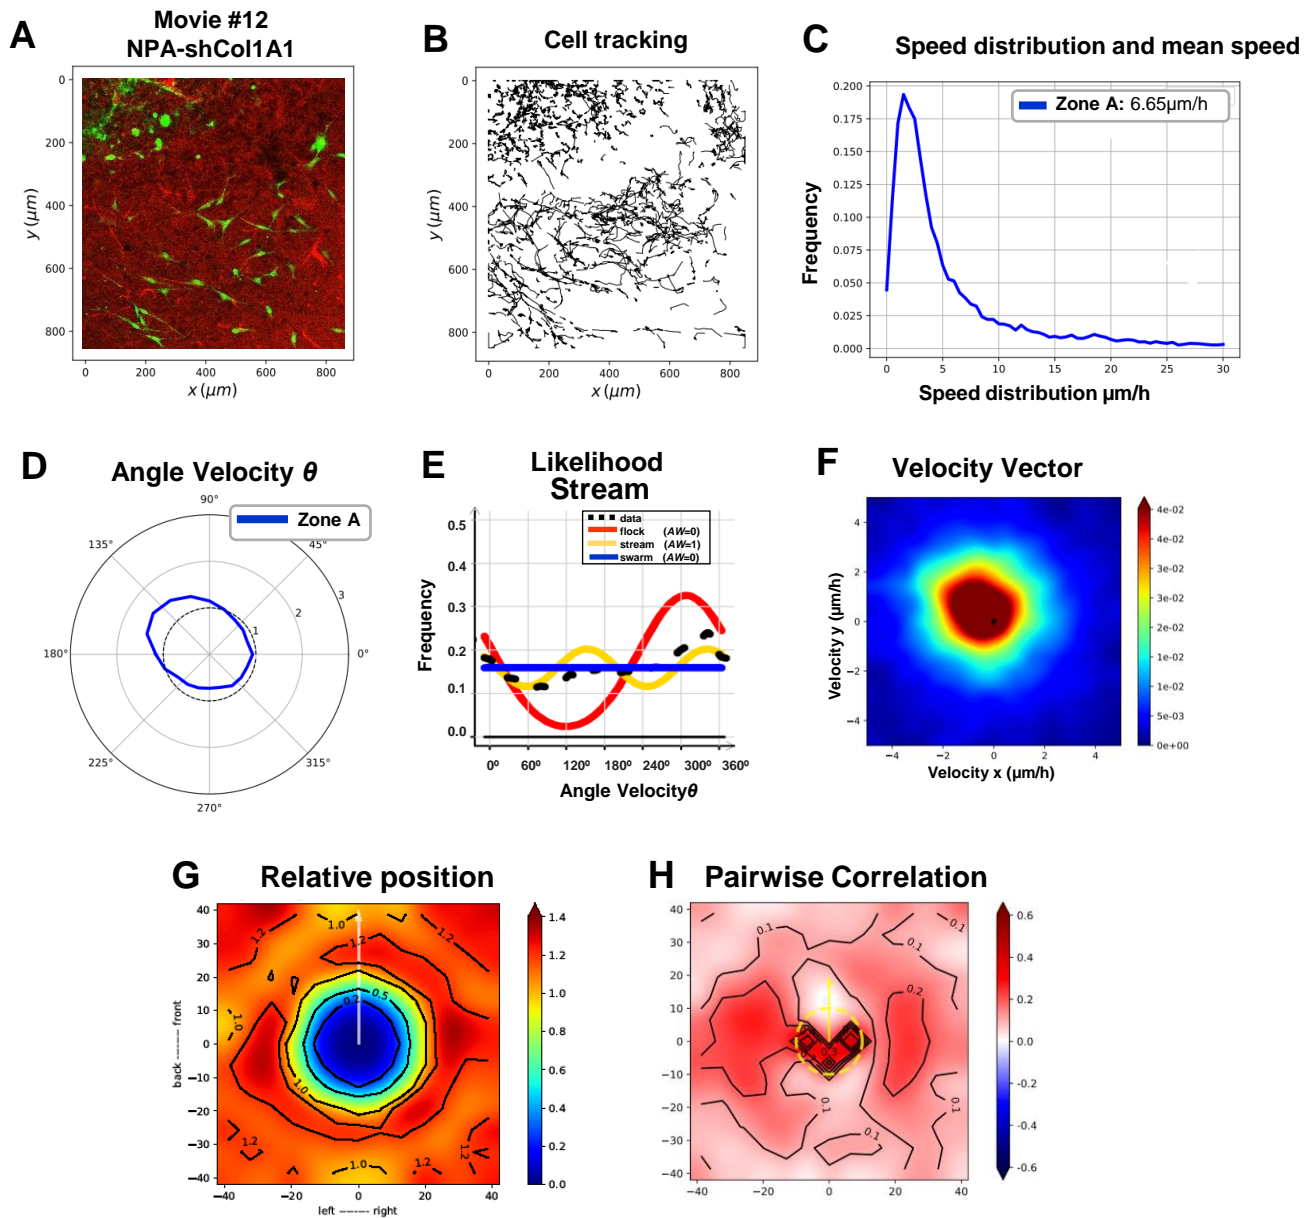

**Fig. S32: Migration analysis of an NPashCol1A1 explant model using confocal time-lapse imaging; Movie # 12.** **A)** Representative time-lapse confocal images of the tumor border for movie #12. The image shows tumor cells (green) and brain parenchyma (red) **B)** Tracking analysis of individual cell paths performed using the Track-Mate plugin from Image-J. **C)** Speed distribution and mean speed ( $\mu\text{m}/\text{h}$ ). **D)** Angle Velocity distribution analysis ( $\theta$ ) performed. **E)** Likelihood analysis histogram to classify the dynamic motion pattern as a swarm. **F)** Heat map plot of the distribution of the velocity vectors. **G)** Histogram plot showing the relative position with nearby neighbors.  $x$  and  $y$  axes are in  $\mu\text{m}$ . Bars to the right of each figure indicate probability values in color. **H)** Histograms of pairwise correlations with nearby neighbors.  $x$  and  $y$  axes are in  $\mu\text{m}$ . Bars to the right of each figure indicate correlation values in colors.

**Fig. S33**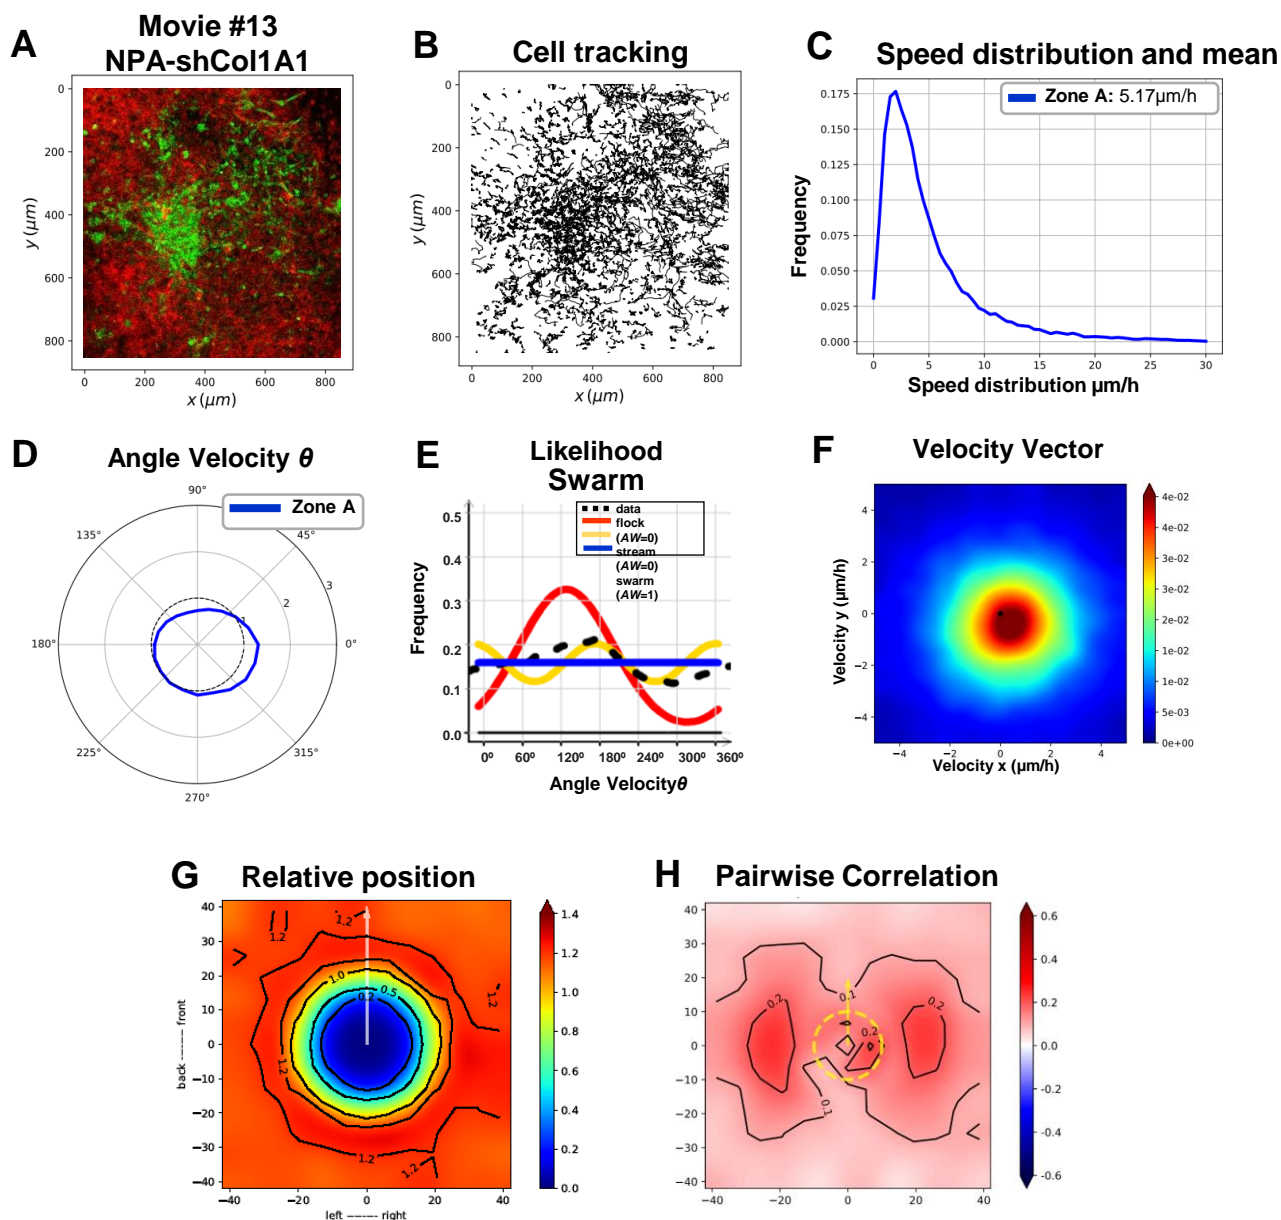

**Fig. S33: Migration analysis of NPAsHCol1A1 explant model using confocal time-lapse imaging; Movie # 13** **A)** Representative time-lapse confocal images of the tumor border for movie #13. The image shows tumor cells (green) and brain parenchyma (red). **B)** Tracking analysis of individual cell paths performed using the Track-Mate plugin from Image-J. **C)** Speed distribution and mean speed ( $\mu\text{m}/\text{h}$ ). **D)** Angle Velocity distribution analysis ( $\theta$ ) performed. **E)** Likelihood analysis histogram to classify the dynamic motion pattern as a swarm. **F)** Heat map plot of the distribution of the velocity vectors. **G)** Histogram plot showing the relative position with nearby neighbors.  $x$  and  $y$  axes are in  $\mu\text{m}$ . Bars to the right of each figure indicate probability values in color. **H)** Histograms of pairwise correlations with nearby neighbors.  $x$  and  $y$  axes are in  $\mu\text{m}$ . Bars to the right of each figure indicate correlation values in colors.

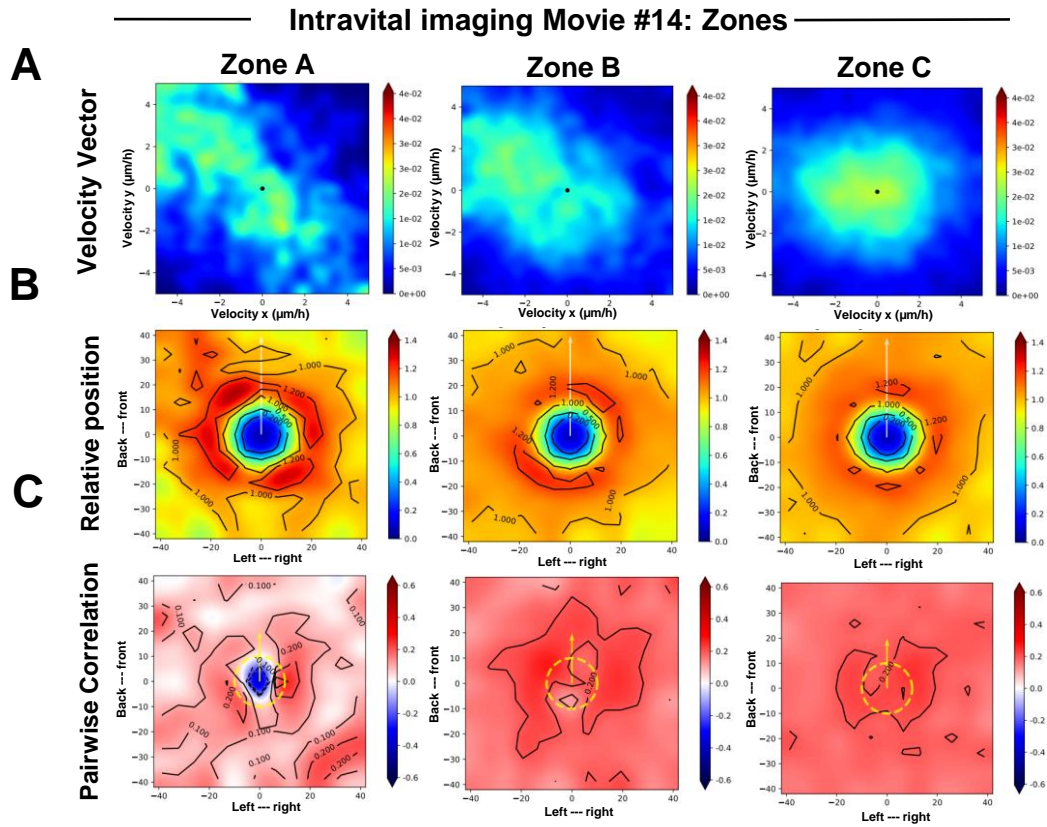

**Fig. S34. Migration analysis in intravital imaging Movie#14**

**A)** Heat map plot of the distribution of the velocity vectors in each zone. **B)** Histogram plot showing the relative position with nearby neighbors for each zone. x and y axes are in  $\mu\text{m}$ . Bars to the right of each figure indicate probability values in color. **C)** Histograms of pairwise correlations with nearby neighbors for each zone. x and y axes are in  $\mu\text{m}$ . Bars to the right of each figure indicate correlation values in colors.



**Fig. S35****In vivo intravital 2P Imaging**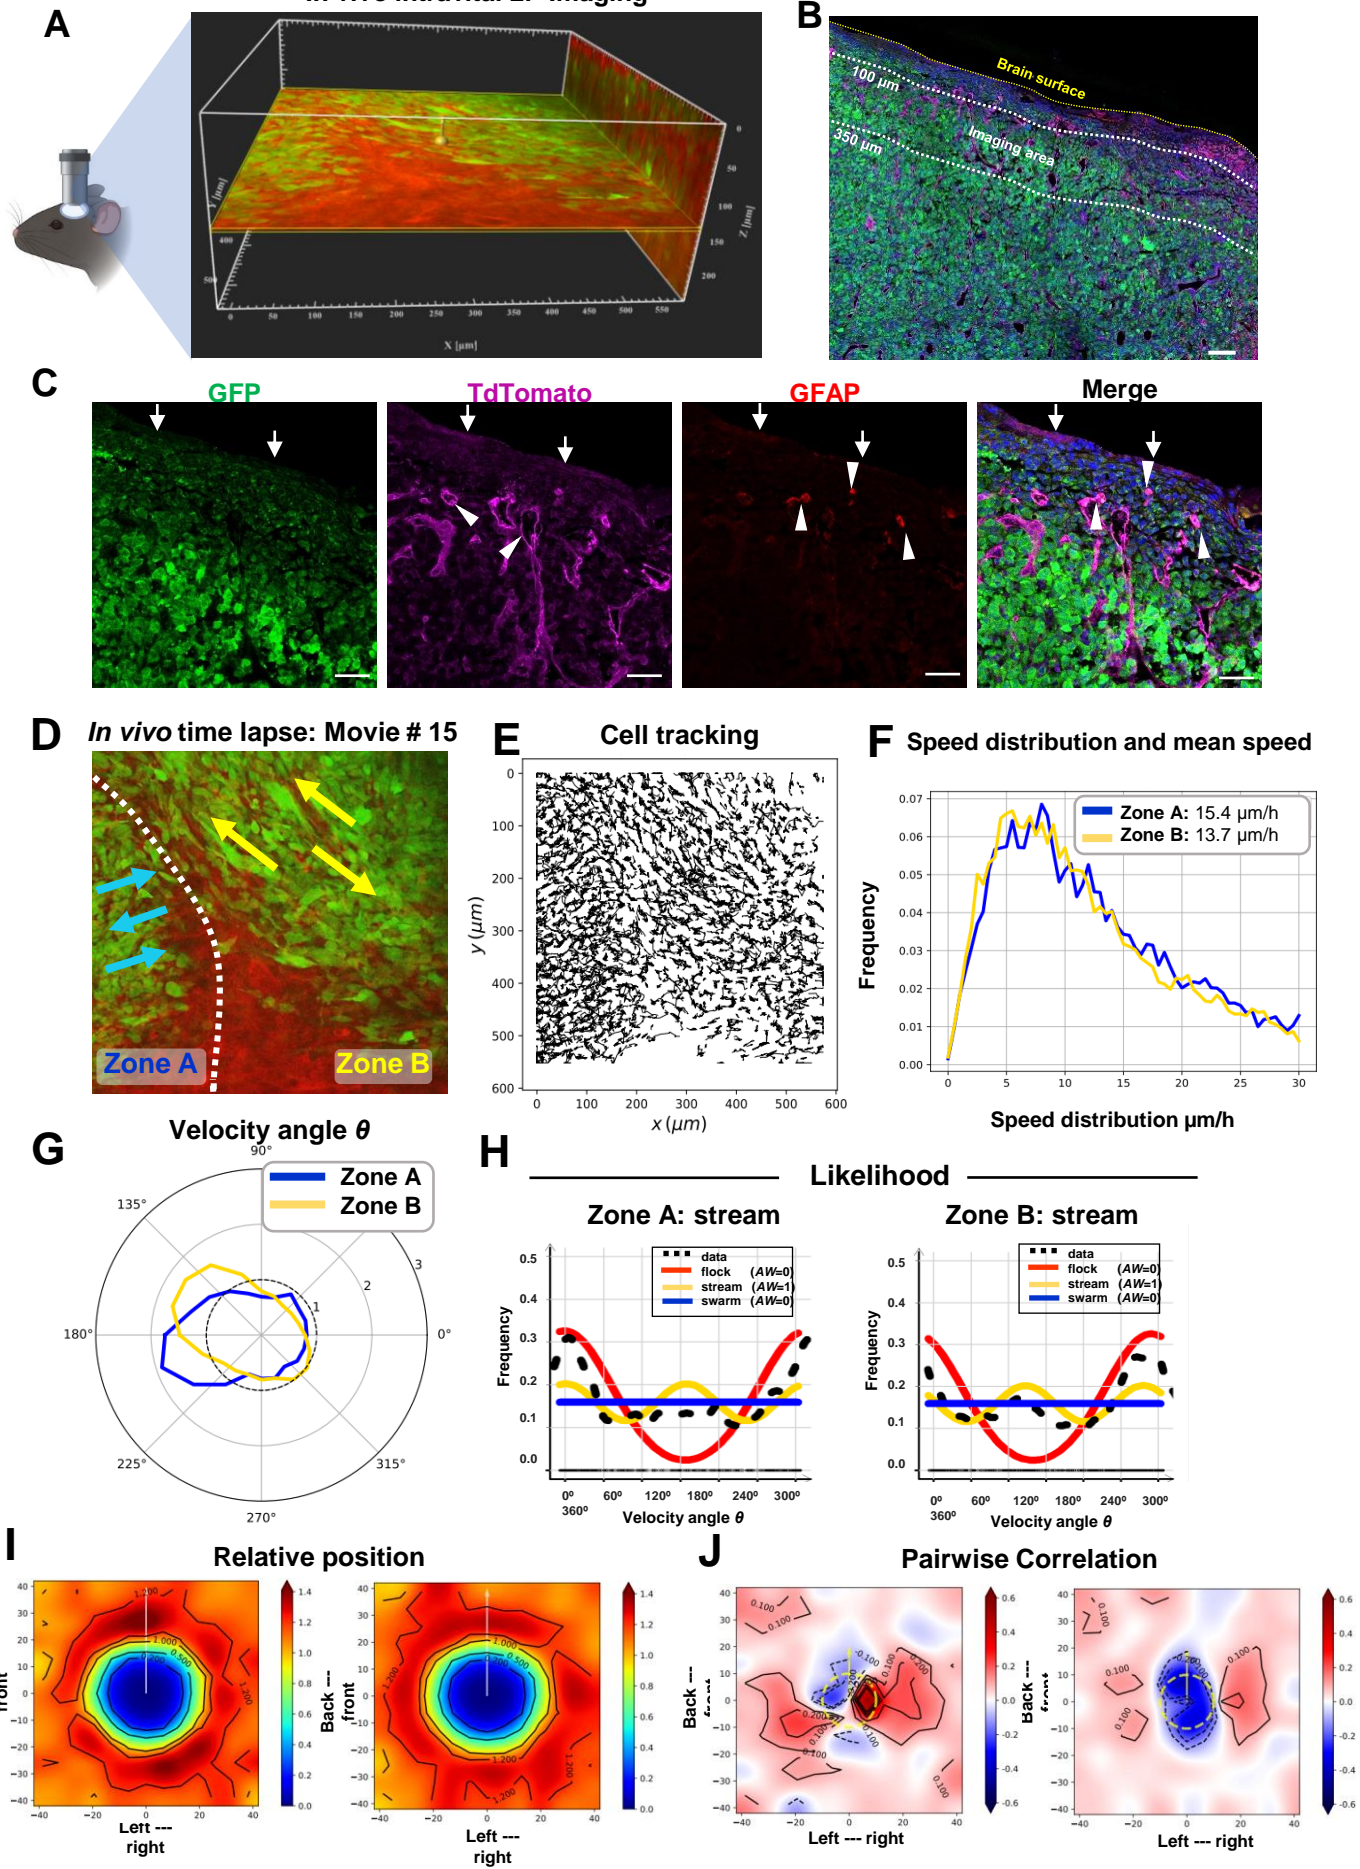

**Fig. S35. Intravital two-photon imaging setup for time-lapse acquisition and immunofluorescence of coronal section of the imaging area: Movie #15**

**A)** shows an image generated using the Orthoslicer 3D function of the Imaris viewer software illustrating the plane used for time-lapse imaging. The image depicts the imaging plane and its distance from the brain's surface. For this experiment, we took 248 x-y frames from the brain's surface at a depth increment of 1  $\mu\text{m}$  (voxel size=1) and resolution of 1024x1024 pixels. XYZ axes of the orthoslicer3D image are shown in white color (596x596x248  $\mu\text{m}$ ). The imaging plane was at 140  $\mu\text{m}$  from the brain surface. Normal brain parenchyma is shown in red and tumor cells in green. (Created in BioRender.com) **B-C)** Following *in vivo* intravital imaging, the animal was perfused, and the brain was fixed and embedded in paraffin. Immunofluorescence was performed on 5  $\mu\text{m}$  thick sections. This experiment was repeated three times. The image shows tumor cells (green) and brain parenchyma (red). **B)** The brain surface is marked in yellow, and the imaging area is marked in between white lines (100 to 350  $\mu\text{m}$  in depth). Sections were stained with anti-GFP (green) to detect tumor cells, anti-tdTomato (pink) to detect brain parenchyma cells, and anti-GFAP (red) to detect astrocytes. Scale bar: 100  $\mu\text{m}$ . **C)** From left to right: Tumor cells (GFP+) growing within the cortex. The brain parenchymal cells (anti-tdTomato+) are present in the brain surface, blood vessels, as well as in between tumor cells. GFAP+ cell processes can be found within the tumor. The merged channel shows the tumor growing mainly below the brain surface and within the brain parenchyma. The tumor cells are interacting with the brain parenchyma (blood vessels, astrocytes). Scale bar: 50  $\mu\text{m}$ . **D)** Single representative time-lapse two-photon image of glioma cell invasion *in vivo* (Movie #15), showing Zones A, B. The image shows tumor cells (green) and brain parenchyma (red). **E)** Individual cell paths trajectories of this *in vivo* time-lapse experiment. **F)** Histogram of speed distribution and mean speed ( $\mu\text{m}/\text{h}$ ) in Zones A, B. **G)** Angle Velocity distribution for each zone's in the *in vivo* time-lapse. The Angle Velocity of each cell is denoted  $\theta$ . The plot shows the proportion of cells moving in the angle direction  $\theta$  for each zone. **H)** Likelihood analysis of the dynamic patterns in each zone of Movie #15 by intravital imaging. Graph of frequency distribution  $\rho$  flock (red),  $\rho$  stream (yellow) and  $\rho$  swarm (blue). The estimation of the black line (data) uses a *non-parametric* estimation. AW: 0 or AW:1. **I)** Histogram plot showing the relative position with nearby neighbors for each zone; x and y axes are in  $\mu\text{m}$ . Bars to the right of each figure indicate probability values in color. **J)** Histograms of pairwise correlations with nearby neighbors for each zone; x and y axes are in  $\mu\text{m}$ . Bars to the right of each figure indicate correlation values in colors.



**Fig. S36**

**In vivo intravital 2P Imaging**

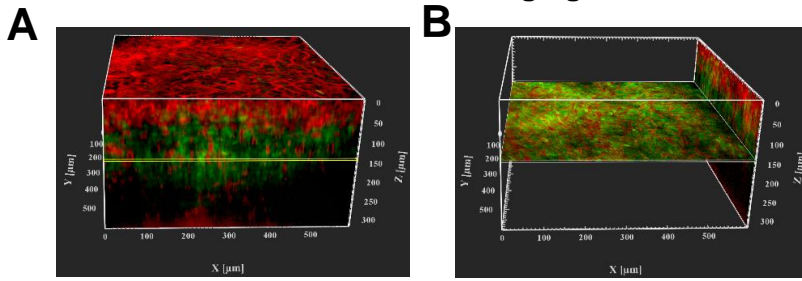

**C In vivo time lapse: Movie # 16**

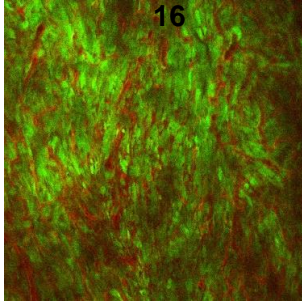

**D Cell tracking**

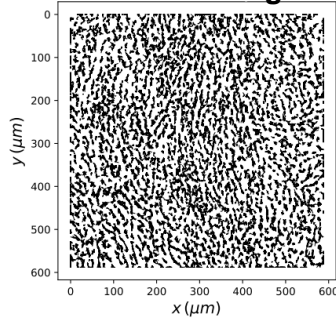

**E Cell directions**

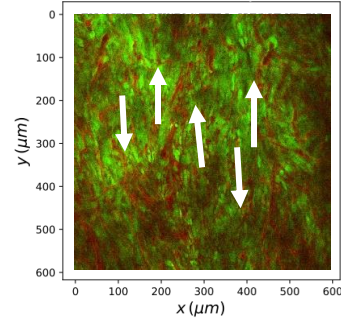

**F Velocity angle  $\theta$**

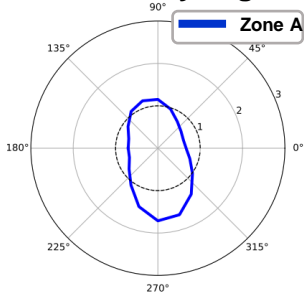

**G Likelihood:**

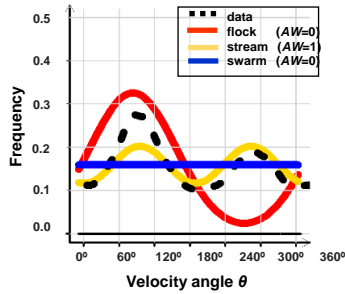

**H Speed distribution and mean speed**

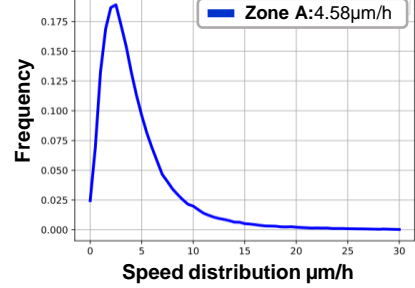

**I Relative position**

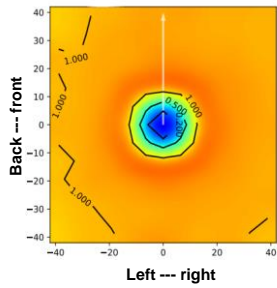

**J Pairwise Correlation**

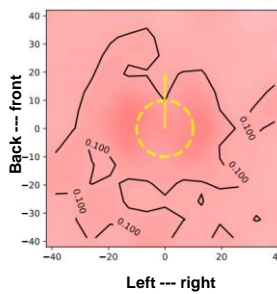

**Fig. S36. Invasion analysis of NPA glioma dynamics within the tumor core using Intravital two-photon microscopy *in vivo*: Movie #16**

**A)** High-resolution 3D Z-stacks (spanning up to 330  $\mu\text{m}$  depth from the brain's surface) were imported into the Imaris viewer to reconstruct the 3D image. To do so, 330 x-y frames from the brain's surface were taken at a depth increment of 1  $\mu\text{m}$  (voxel size=1) and resolution of 1024x1024 pixels. The XYZ axes of the 3D image are shown in white color (each comprising an area of 596x596x330  $\mu\text{m}$ ), and the yellow line (at 145  $\mu\text{m}$  depth) shows the exact imaging plane used to obtain the *in vivo* time-lapse data for movie #16. The image shows tumor cells (green) and brain parenchyma (red). **B)** shows an image generated with the Orthoslicer3D from Imaris using the 3D reconstruction data shown in **(A)**; this illustrates the depth of the imaging plane and its distance from the brain surface. Normal brain parenchyma is shown in red, and tumor cells are shown in green. **C)** Single representative time-lapse two-photon image of glioma cells within the tumor core *in vivo* taken at a depth of 145  $\mu\text{m}$ . **D)** Individual cell paths trajectories of this *in vivo* time-lapse experiment. **E)** Preferred directions of cells within the tumor core superimposed onto a representative time-lapse image. **F)** Angle Velocity distribution for the migration of cells growing within the tumor core for the *in vivo* time-lapse dataset. Angle Velocity for each cell is denoted  $\theta$ . The plot shows the proportion of cells moving in the angle direction  $\theta$ . **G)** The frequency distribution corresponding to Angle Velocity( $\theta$ ) is shown by dotted black lines. Likelihood analysis of the dynamic patterns within the tumor core (Movie#16). Graph of frequency distribution is shown as  $\rho$  flock (red),  $\rho$  stream (yellow) and  $\rho$  swarm (blue). The estimation of the black line (data) uses *non-parametric* estimation. AW: 0 or AW:1. **H)** Histogram of speed distribution and mean speed in  $\mu\text{m}/\text{hr}$  for the full time-lapse movie considered as a single zone named Zone A. **I)** Histogram plot showing the relative position of nearest neighbors for Zone A; x and y axes are in  $\mu\text{m}$ . Bars to the right of each figure indicate probability values in color. **J)** Histograms of pairwise correlations with nearby neighbors for Zone A; x and y axes are in  $\mu\text{m}$ . Bars to the right of each figure indicate correlation values in colors.

Fig. S37

*In vivo* intravital 2P Imaging

**A**

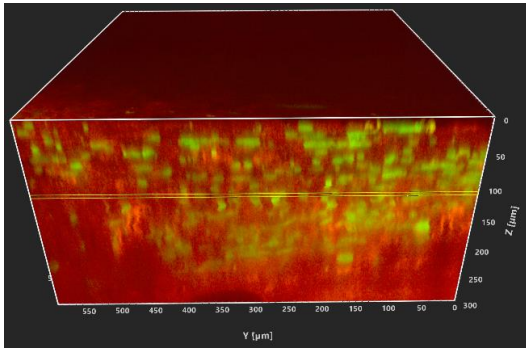

**B**

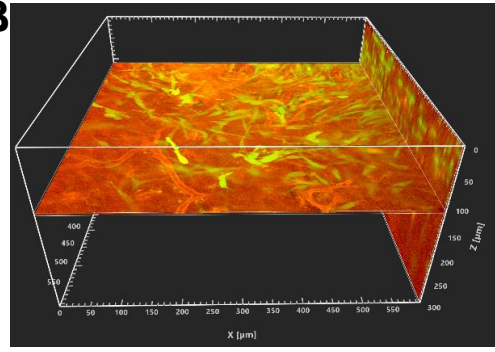

**C** *In vivo* time lapse: Movie #17

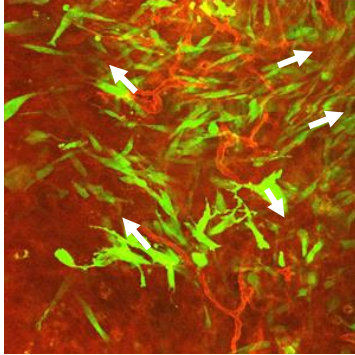

**D** Cell tracking

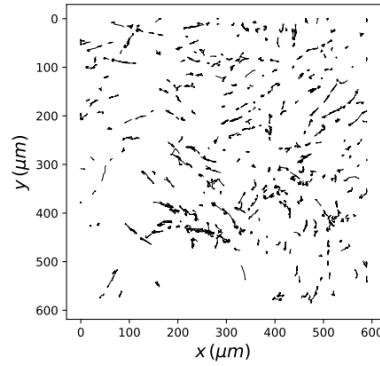

**E** Cell alignment

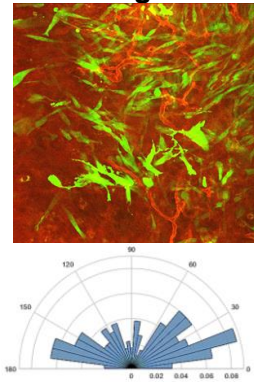

**F** Velocity angle

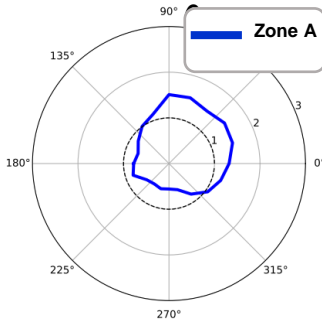

**G** Likelihood: swarm

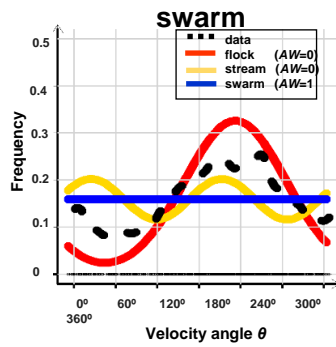

**H** Speed distribution and mean

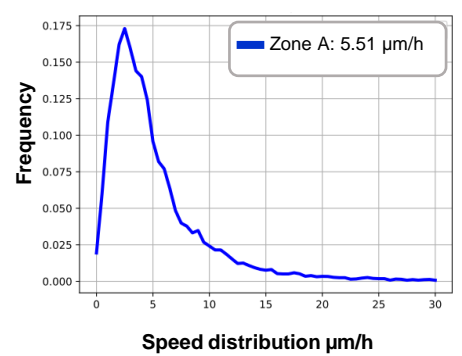

**I** Velocity Vector

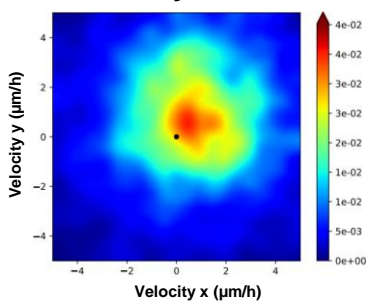

**J** Relative position

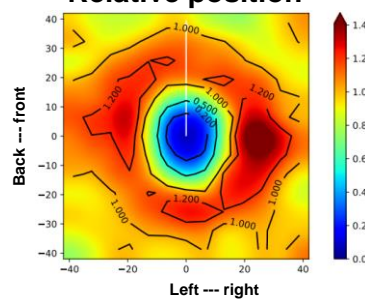

**K** Pairwise Correlation

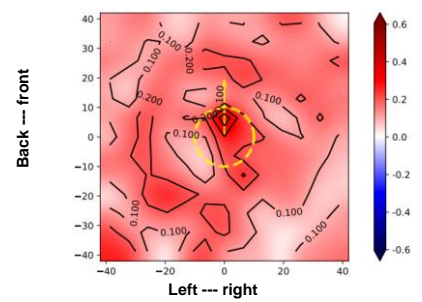

**Fig. S37. Invasion analysis of NPashCol1A1 glioma dynamics using Intravital two-photon microscopy *in vivo*: Movie #17**

**A)** High-resolution 3D Z-stacks (spanning up to 300  $\mu\text{m}$  depth from the brain's surface) were imported into the Imaris viewer to reconstruct the 3D image. To do so, 300 x-y frames from the brain's surface were taken at a depth increment of 1  $\mu\text{m}$  (voxel size=1) and resolution of 1024x1024 pixels. The XYZ axes of the 3D image are shown in white color (each comprising an area of 596x596x300  $\mu\text{m}$ ), and the yellow line (at 110  $\mu\text{m}$  depth) shows the exact imaging plane used to obtain the *in vivo* time-lapse data for movie #17. The image shows tumor cells (green) and brain parenchyma (red). **B)** shows an image generated with the Orthoslicer3D from Imaris using the 3D reconstruction data shown in **(A)**; this illustrates the depth of the imaging plane and its distance from the brain surface. Normal brain parenchyma is shown in red, and tumor cells are shown in green. **C)** Single representative time-lapse two-photon image of NPashCol1A1 glioma cells within the tumor core *in vivo* taken at a depth of 110  $\mu\text{m}$ . Preferred directions of cells within tumor core superimposed onto a representative time-lapse image. **D)** Individual cell paths trajectories of this *in vivo* time-lapse experiment. **E)** Angle histogram plots show the random alignment of NPashCol1A1 glioma cells lacking oncostreams *in vivo*. Angle histograms correspond to the representative time-lapse two-photon image on the top. **F)** Angle Velocity distribution for the migration of NPashCol1A1 glioma cells growing within the tumor core for the *in vivo* time-lapse dataset. The Angle Velocity of each cell is denoted  $\theta$ . The plot shows the proportion of cells moving in the angle direction  $\theta$ . **G)** The frequency distribution corresponding to Angle Velocity( $\theta$ ) is shown by dotted black lines. Likelihood analysis of the dynamic patterns within the tumor core (Movie#17). Graph of frequency distribution is shown as  $\rho$  flock (red),  $\rho$  stream (yellow) and  $\rho$  swarm (blue). The estimation of the black line (data) uses a *non-parametric* estimation. AW:0 or AW:1. **H)** Histogram of speed distribution and mean speed in  $\mu\text{m}/\text{h}$  for the full time-lapse movie considered as a single zone named Zone A. **I)** Heatmap plot of the distribution of velocity vectors within Zone A. **J)** Histogram plot showing the relative position of nearest neighbors for Zone A; x and y axes are in  $\mu\text{m}$ . Bars to the right of each figure indicate probability values in color. **K)** Histograms of pairwise correlations with nearby neighbors for Zone A; x and y axes are in  $\mu\text{m}$ . Bars to the right of each figure indicate correlation values in colors.
